# Supplementary material for: Human miRNome Profiling in Colon Adenoma-carcinoma Sequence Reveal Early Deregulation of miR-1246, Which Exhibits Oncogenic Properties in Vitro by Targeting AXIN2 and CFTR
Source: Research Square preprint supplement (doi:10.21203/rs.3.rs-558860/v1), 2021-06-02
Supplement: Supplementary file 1 [file 508dc85bf488131f59eae73a.xlsx]

## Sheet: Sheet 1
Supplementary Table 2. Results of isomiR differential expression analysis among CRC, AP and HC tissues (NGS data). Column annotations: gene – isomiR name; baseMean – the average of the normalized counts taken over all samples in comparison; log2FoldChange – log2 fold change between the groups; lfcSE – standard error of the log2FoldChange estimate; stat – Wald statistic; pvalue – Wald test p-value…
gene	baseMean	log2FoldChange	lfcSE	stat	pvalue	padj	comparison
hsa-let-7a-2-3p.ref.t5:0.seed:0.t3:0.ad:0.mm:0	0.256537	0.313806	1.46322	0.214463	0.830186		CRC_vs_HC
hsa-let-7a-3p.iso.t5:0.seed:0.t3:0.ad:A.mm:0	1.59664	0.908211	0.421931	2.15251	0.0313573	0.110286	CRC_vs_HC
hsa-let-7a-3p.iso.t5:0.seed:0.t3:0.ad:G.mm:0	0.256379	0.0146156	0.877434	0.0166572	0.98671		CRC_vs_HC
hsa-let-7a-3p.iso.t5:0.seed:0.t3:0.ad:T.mm:0	113.512	0.218426	0.152911	1.42845	0.153162	0.338314	CRC_vs_HC
hsa-let-7a-3p.iso.t5:0.seed:0.t3:0.ad:TA.mm:0	0.100766	0.19755	1.79012	0.110356	0.912127		CRC_vs_HC
hsa-let-7a-3p.iso.t5:0.seed:0.t3:0.ad:TT.mm:0	0.710982	-0.266364	0.563066	-0.473061	0.63617	0.801273	CRC_vs_HC
hsa-let-7a-3p.iso.t5:0.seed:0.t3:0.ad:TTT.mm:0	0.11267	-1.10354	2.50338	-0.440821	0.659342		CRC_vs_HC
hsa-let-7a-3p.iso.t5:0.seed:0.t3:c.ad:0.mm:0	7.22464	0.221379	0.286712	0.772131	0.440037	0.649893	CRC_vs_HC
hsa-let-7a-3p.iso.t5:0.seed:0.t3:C.ad:0.mm:0	19.2973	0.463194	0.146451	3.16279	0.00156263	0.0109005	CRC_vs_HC
hsa-let-7a-3p.iso.t5:0.seed:0.t3:C.ad:A.mm:0	0.87382	0.0752211	0.450977	0.166796	0.867531	0.933241	CRC_vs_HC
hsa-let-7a-3p.iso.t5:0.seed:0.t3:c.ad:AT.mm:0	0.119397	-0.0712789	1.34628	-0.052945	0.957776		CRC_vs_HC
hsa-let-7a-3p.iso.t5:0.seed:0.t3:c.ad:T.mm:0	0.698619	0.156254	0.517624	0.301867	0.762753	0.880188	CRC_vs_HC
hsa-let-7a-3p.iso.t5:0.seed:0.t3:c.ad:TT.mm:0	0.521051	0.407534	0.535251	0.76139	0.446424	0.656224	CRC_vs_HC
hsa-let-7a-3p.iso.t5:0.seed:0.t3:CT.ad:0.mm:0	2.26213	0.120097	0.30944	0.388112	0.697933	0.842876	CRC_vs_HC
hsa-let-7a-3p.iso.t5:0.seed:0.t3:tc.ad:0.mm:0	0.688558	0.207834	0.518742	0.40065	0.688678	0.836814	CRC_vs_HC
hsa-let-7a-3p.iso.t5:0.seed:0.t3:ttc.ad:0.mm:0	0.645429	0.231459	0.528357	0.438073	0.661334	0.819314	CRC_vs_HC
hsa-let-7a-3p.iso.t5:A.seed:0.t3:0.ad:0.mm:0	0.472362	-0.465704	0.996339	-0.467415	0.640203	0.804385	CRC_vs_HC
hsa-let-7a-3p.iso.t5:c.seed:0.t3:0.ad:0.mm:0	0.509698	0.17589	0.610457	0.288128	0.773249	0.885867	CRC_vs_HC
hsa-let-7a-3p.iso.t5:c.seed:0.t3:0.ad:T.mm:0	0.705059	0.904405	0.61573	1.46883	0.141878	0.321674	CRC_vs_HC
hsa-let-7a-3p.iso.t5:c.seed:0.t3:0.ad:TT.mm:0	0.326837	-0.897425	0.807298	-1.11164	0.266293		CRC_vs_HC
hsa-let-7a-3p.iso.t5:c.seed:0.t3:c.ad:0.mm:0	0.149045	0.0444915	1.67147	0.0266181	0.978764		CRC_vs_HC
hsa-let-7a-3p.iso.t5:c.seed:0.t3:C.ad:0.mm:0	1.08747	1.04348	0.397637	2.62421	0.00868494	0.0424545	CRC_vs_HC
hsa-let-7a-3p.iso.t5:c.seed:0.t3:C.ad:A.mm:0	0.267711	-0.884612	0.798104	-1.10839	0.267692		CRC_vs_HC
hsa-let-7a-3p.iso.t5:c.seed:0.t3:c.ad:T.mm:0	0.0260481	-0.482525	3.81644	-0.126433	0.899389		CRC_vs_HC
hsa-let-7a-3p.iso.t5:c.seed:0.t3:CT.ad:0.mm:0	9.00585	0.553574	0.199373	2.77658	0.00549346	0.0300169	CRC_vs_HC
hsa-let-7a-3p.iso.t5:c.seed:0.t3:CT.ad:G.mm:0	0.0682526	-0.91906	3.05141	-0.301192	0.763268		CRC_vs_HC
hsa-let-7a-3p.iso.t5:ct.seed:0.t3:0.ad:TT.mm:0	0.0691918	-0.24104	3.03868	-0.0793237	0.936775		CRC_vs_HC
hsa-let-7a-3p.iso.t5:ct.seed:0.t3:CT.ad:0.mm:0	0.883303	0.786514	0.476325	1.65121	0.0986952	0.250988	CRC_vs_HC
hsa-let-7a-3p.iso.t5:ct.seed:0.t3:CT.ad:GA.mm:0	0.028456	-1.0457	3.81644	-0.274	0.784085		CRC_vs_HC
hsa-let-7a-3p.iso.t5:ct.seed:0.t3:CT.ad:GT.mm:0	0.124624	-0.158677	1.77064	-0.0896159	0.928592		CRC_vs_HC
hsa-let-7a-3p.iso.t5:cta.seed:0.t3:CT.ad:G.mm:0	0.133835	-0.0823107	2.18617	-0.0376506	0.969966		CRC_vs_HC
hsa-let-7a-3p.iso.t5:cta.seed:0.t3:CT.ad:GA.mm:0	0.0610423	0.0167021	2.65573	0.00628907	0.994982		CRC_vs_HC
hsa-let-7a-3p.iso.t5:cta.seed:0.t3:CT.ad:GT.mm:0	0.455929	0.343472	0.686801	0.500104	0.617002	0.787222	CRC_vs_HC
hsa-let-7a-3p.iso.t5:TAA.seed:0.t3:0.ad:0.mm:0	0.0431575	-1.00847	3.81602	-0.264272	0.791571		CRC_vs_HC
hsa-let-7a-3p.ref.t5:0.seed:0.t3:0.ad:0.mm:0	23.1711	0.343363	0.24916	1.37808	0.168178	0.35908	CRC_vs_HC
hsa-let-7a-5p.iso.t5:0.seed:0.t3:0.ad:A.mm:0	1960	-0.763074	0.15388	-4.9589	7.08935e-07	1.69143e-05	CRC_vs_HC
hsa-let-7a-5p.iso.t5:0.seed:0.t3:0.ad:AA.mm:0	75.6008	-0.73641	0.168088	-4.3811	1.18081e-05	0.000189914	CRC_vs_HC
hsa-let-7a-5p.iso.t5:0.seed:0.t3:0.ad:AAA.mm:0	3.26908	-0.115313	0.31848	-0.362072	0.717298	0.854921	CRC_vs_HC
hsa-let-7a-5p.iso.t5:0.seed:0.t3:0.ad:AAC.mm:0	0.106331	-0.673755	2.2295	-0.302199	0.7625		CRC_vs_HC
hsa-let-7a-5p.iso.t5:0.seed:0.t3:0.ad:AAG.mm:0	0.0936313	-0.952625	1.98932	-0.47887	0.632031		CRC_vs_HC
hsa-let-7a-5p.iso.t5:0.seed:0.t3:0.ad:AAT.mm:0	0.800129	-0.371624	0.545333	-0.681462	0.495579	0.700089	CRC_vs_HC
hsa-let-7a-5p.iso.t5:0.seed:0.t3:0.ad:AC.mm:0	0.734885	-0.226017	0.711618	-0.31761	0.750781	0.874056	CRC_vs_HC
hsa-let-7a-5p.iso.t5:0.seed:0.t3:0.ad:AG.mm:0	3.25629	-0.61752	0.291271	-2.12009	0.0339986	0.117136	CRC_vs_HC
hsa-let-7a-5p.iso.t5:0.seed:0.t3:0.ad:AGA.mm:0	0.207898	-1.14793	1.22926	-0.933838	0.350387		CRC_vs_HC
hsa-let-7a-5p.iso.t5:0.seed:0.t3:0.ad:AT.mm:0	42.7577	-0.782679	0.162336	-4.82134	1.42599e-06	3.08242e-05	CRC_vs_HC
hsa-let-7a-5p.iso.t5:0.seed:0.t3:0.ad:ATA.mm:0	0.113752	-1.3549	1.60636	-0.843459	0.398972		CRC_vs_HC
hsa-let-7a-5p.iso.t5:0.seed:0.t3:0.ad:ATT.mm:0	0.860365	-0.608688	0.502507	-1.2113	0.225779	0.431972	CRC_vs_HC
hsa-let-7a-5p.iso.t5:0.seed:0.t3:0.ad:C.mm:0	8.97264	-0.895323	0.241036	-3.71447	0.000203628	0.00205952	CRC_vs_HC
hsa-let-7a-5p.iso.t5:0.seed:0.t3:0.ad:CT.mm:0	0.48574	-1.63958	0.838912	-1.95442	0.0506519	0.156726	CRC_vs_HC
hsa-let-7a-5p.iso.t5:0.seed:0.t3:0.ad:G.mm:0	140.093	-0.798677	0.136736	-5.84103	5.18784e-09	2.45922e-07	CRC_vs_HC
hsa-let-7a-5p.iso.t5:0.seed:0.t3:0.ad:GA.mm:0	0.350762	-1.60807	0.988705	-1.62644	0.103856		CRC_vs_HC
hsa-let-7a-5p.iso.t5:0.seed:0.t3:0.ad:GT.mm:0	0.244911	-1.3157	0.950571	-1.38412	0.166322		CRC_vs_HC
hsa-let-7a-5p.iso.t5:0.seed:0.t3:gtt.ad:0.mm:0	137.077	-0.984245	0.17835	-5.51861	3.41687e-08	1.28407e-06	CRC_vs_HC
hsa-let-7a-5p.iso.t5:0.seed:0.t3:gtt.ad:A.mm:0	27.3574	-1.276	0.224803	-5.67608	1.37814e-08	5.93423e-07	CRC_vs_HC
hsa-let-7a-5p.iso.t5:0.seed:0.t3:gtt.ad:AA.mm:0	15.8813	-1.18586	0.313848	-3.77843	0.000157818	0.00166086	CRC_vs_HC
hsa-let-7a-5p.iso.t5:0.seed:0.t3:gtt.ad:AAA.mm:0	4.36941	-1.21333	0.374926	-3.23618	0.00121139	0.00886227	CRC_vs_HC
hsa-let-7a-5p.iso.t5:0.seed:0.t3:gtt.ad:AAT.mm:0	0.424757	-1.24745	0.808691	-1.54255	0.12294	0.292609	CRC_vs_HC
hsa-let-7a-5p.iso.t5:0.seed:0.t3:gtt.ad:AC.mm:0	0.163659	-1.09163	1.37153	-0.795917	0.426081		CRC_vs_HC
hsa-let-7a-5p.iso.t5:0.seed:0.t3:gtt.ad:AG.mm:0	0.442358	-1.28381	0.71075	-1.80627	0.0708759	0.198865	CRC_vs_HC
hsa-let-7a-5p.iso.t5:0.seed:0.t3:gtt.ad:AGA.mm:0	0.125445	-1.67262	1.80885	-0.924688	0.355128		CRC_vs_HC
hsa-let-7a-5p.iso.t5:0.seed:0.t3:gtt.ad:AT.mm:0	2.65471	-0.266208	0.365674	-0.727992	0.466618	0.673866	CRC_vs_HC
hsa-let-7a-5p.iso.t5:0.seed:0.t3:gtt.ad:ATA.mm:0	0.186644	-1.44754	1.57061	-0.921643	0.356715		CRC_vs_HC
hsa-let-7a-5p.iso.t5:0.seed:0.t3:gtt.ad:ATT.mm:0	12.9644	-0.558205	0.275271	-2.02784	0.0425767	0.137982	CRC_vs_HC
hsa-let-7a-5p.iso.t5:0.seed:0.t3:gtt.ad:C.mm:0	0.381656	-0.78101	0.994112	-0.785637	0.43208		CRC_vs_HC
hsa-let-7a-5p.iso.t5:0.seed:0.t3:gtt.ad:CA.mm:0	0.219296	-1.01371	2.66227	-0.380769	0.703375		CRC_vs_HC
hsa-let-7a-5p.iso.t5:0.seed:0.t3:gtt.ad:CAA.mm:0	0.0497613	-0.845046	3.81614	-0.22144	0.82475		CRC_vs_HC
hsa-let-7a-5p.iso.t5:0.seed:0.t3:gtt.ad:CCT.mm:0	0.196418	-1.87435	1.23801	-1.514	0.130026		CRC_vs_HC
hsa-let-7a-5p.iso.t5:0.seed:0.t3:gtt.ad:CT.mm:0	2.39283	-2.8718	0.616621	-4.65732	3.20354e-06	6.12812e-05	CRC_vs_HC
hsa-let-7a-5p.iso.t5:0.seed:0.t3:gtt.ad:CTA.mm:0	0.0774157	-0.97978	2.03086	-0.482447	0.629489		CRC_vs_HC
hsa-let-7a-5p.iso.t5:0.seed:0.t3:gtt.ad:CTT.mm:0	16.2458	-2.20642	0.418304	-5.27469	1.32982e-07	4.14199e-06	CRC_vs_HC
hsa-let-7a-5p.iso.t5:0.seed:0.t3:gtt.ad:T.mm:0	9.82353	-0.843785	0.244248	-3.45463	0.000551057	0.00458846	CRC_vs_HC
hsa-let-7a-5p.iso.t5:0.seed:0.t3:gtt.ad:TA.mm:0	0.469207	-1.24102	0.740521	-1.67587	0.0937641	0.242713	CRC_vs_HC
hsa-let-7a-5p.iso.t5:0.seed:0.t3:gtt.ad:TAA.mm:0	0.0940932	-1.29343	1.99467	-0.648444	0.516698		CRC_vs_HC
hsa-let-7a-5p.iso.t5:0.seed:0.t3:gtt.ad:TCT.mm:0	0.20415	0.216573	1.17329	0.184586	0.853554		CRC_vs_HC
hsa-let-7a-5p.iso.t5:0.seed:0.t3:gtt.ad:TGT.mm:0	0.0810628	-0.91367	2.26057	-0.404177	0.686082		CRC_vs_HC
hsa-let-7a-5p.iso.t5:0.seed:0.t3:gtt.ad:TT.mm:0	1.76982	-0.754565	0.449563	-1.67844	0.0932612	0.242117	CRC_vs_HC
hsa-let-7a-5p.iso.t5:0.seed:0.t3:gtt.ad:TTT.mm:0	13.5719	-0.501653	0.249219	-2.0129	0.0441249	0.141724	CRC_vs_HC
hsa-let-7a-5p.iso.t5:0.seed:0.t3:t.ad:0.mm:0	8336.09	-0.838897	0.14256	-5.88452	3.99207e-09	1.97073e-07	CRC_vs_HC
hsa-let-7a-5p.iso.t5:0.seed:0.t3:T.ad:0.mm:0	2359.55	-0.742059	0.156345	-4.74628	2.07188e-06	4.21711e-05	CRC_vs_HC
hsa-let-7a-5p.iso.t5:0.seed:0.t3:t.ad:A.mm:0	348.97	-0.848446	0.178956	-4.74108	2.12581e-06	4.31065e-05	CRC_vs_HC
hsa-let-7a-5p.iso.t5:0.seed:0.t3:t.ad:AA.mm:0	71.1574	-0.987885	0.203747	-4.84859	1.2434e-06	2.737e-05	CRC_vs_HC
hsa-let-7a-5p.iso.t5:0.seed:0.t3:t.ad:AAA.mm:0	3.07238	-0.606828	0.308101	-1.96958	0.048887	0.15262	CRC_vs_HC
hsa-let-7a-5p.iso.t5:0.seed:0.t3:t.ad:AAT.mm:0	1.14154	-1.7649	0.517218	-3.4123	0.000644165	0.00524623	CRC_vs_HC
hsa-let-7a-5p.iso.t5:0.seed:0.t3:t.ad:AC.mm:0	0.326875	-0.304081	0.74781	-0.406629	0.684281		CRC_vs_HC
hsa-let-7a-5p.iso.t5:0.seed:0.t3:t.ad:AG.mm:0	3.7054	-0.673115	0.289819	-2.32253	0.0202043	0.0799006	CRC_vs_HC
hsa-let-7a-5p.iso.t5:0.seed:0.t3:t.ad:AGA.mm:0	0.308751	-1.40305	0.917203	-1.5297	0.12609		CRC_vs_HC
hsa-let-7a-5p.iso.t5:0.seed:0.t3:t.ad:AGT.mm:0	0.0751545	-0.612977	2.27972	-0.268883	0.78802		CRC_vs_HC
hsa-let-7a-5p.iso.t5:0.seed:0.t3:t.ad:AT.mm:0	29.2047	-0.781288	0.230755	-3.38578	0.000709753	0.00566963	CRC_vs_HC
hsa-let-7a-5p.iso.t5:0.seed:0.t3:t.ad:ATT.mm:0	0.306858	-0.610449	0.764526	-0.798468	0.424599		CRC_vs_HC
hsa-let-7a-5p.iso.t5:0.seed:0.t3:t.ad:C.mm:0	4.74188	-0.523042	0.275024	-1.9018	0.0571971	0.170299	CRC_vs_HC
hsa-let-7a-5p.iso.t5:0.seed:0.t3:T.ad:C.mm:0	0.346389	-1.39952	0.813361	-1.72066	0.0853125		CRC_vs_HC
hsa-let-7a-5p.iso.t5:0.seed:0.t3:t.ad:CA.mm:0	0.927656	-0.19848	0.480835	-0.412782	0.679766	0.830077	CRC_vs_HC
hsa-let-7a-5p.iso.t5:0.seed:0.t3:t.ad:CT.mm:0	0.39306	-0.320991	0.738745	-0.434509	0.663919		CRC_vs_HC
hsa-let-7a-5p.iso.t5:0.seed:0.t3:t.ad:G.mm:0	26.7989	-0.554618	0.234363	-2.36649	0.0179578	0.0730097	CRC_vs_HC
hsa-let-7a-5p.iso.t5:0.seed:0.t3:t.ad:GA.mm:0	1.89518	-0.853494	0.407353	-2.09522	0.0361513	0.121873	CRC_vs_HC
hsa-let-7a-5p.iso.t5:0.seed:0.t3:t.ad:GT.mm:0	2.03187	-0.35545	0.379355	-0.936985	0.348766	0.564545	CRC_vs_HC
hsa-let-7a-5p.iso.t5:0.seed:0.t3:TA.ad:0.mm:0	16.2053	-0.514177	0.195925	-2.62436	0.00868127	0.0424545	CRC_vs_HC
hsa-let-7a-5p.iso.t5:0.seed:0.t3:TA.ad:0.mm:1AT	0.0421721	-0.00821349	3.81557	-0.00215263	0.998282		CRC_vs_HC
hsa-let-7a-5p.iso.t5:0.seed:0.t3:TA.ad:A.mm:0	0.341737	-0.737769	0.742505	-0.993622	0.320407		CRC_vs_HC
hsa-let-7a-5p.iso.t5:0.seed:0.t3:TA.ad:AA.mm:0	0.277069	-0.371172	1.03811	-0.357546	0.720683		CRC_vs_HC
hsa-let-7a-5p.iso.t5:0.seed:0.t3:TA.ad:AAA.mm:0	0.0694183	-0.760306	2.61808	-0.290406	0.771505		CRC_vs_HC
hsa-let-7a-5p.iso.t5:0.seed:0.t3:TA.ad:T.mm:0	0.365142	-0.666019	0.855373	-0.77863	0.436197		CRC_vs_HC
hsa-let-7a-5p.iso.t5:0.seed:0.t3:TG.ad:0.mm:0	1.14722	-0.556512	0.4218	-1.31937	0.187044	0.384621	CRC_vs_HC
hsa-let-7a-5p.iso.t5:0.seed:0.t3:TG.ad:A.mm:0	0.0822497	-0.888036	3.51649	-0.252535	0.800628		CRC_vs_HC
hsa-let-7a-5p.iso.t5:0.seed:0.t3:tt.ad:0.mm:0	752.657	-1.04111	0.157178	-6.62379	3.50099e-11	3.26817e-09	CRC_vs_HC
hsa-let-7a-5p.iso.t5:0.seed:0.t3:TT.ad:0.mm:0	38.3317	-0.618419	0.157583	-3.92439	8.69501e-05	0.00100724	CRC_vs_HC
hsa-let-7a-5p.iso.t5:0.seed:0.t3:tt.ad:A.mm:0	99.1604	-1.26685	0.186814	-6.78137	1.19045e-11	1.29963e-09	CRC_vs_HC
hsa-let-7a-5p.iso.t5:0.seed:0.t3:tt.ad:AA.mm:0	16.7143	-1.32568	0.258164	-5.13501	2.82125e-07	7.83859e-06	CRC_vs_HC
hsa-let-7a-5p.iso.t5:0.seed:0.t3:tt.ad:AAA.mm:0	4.52414	-1.32041	0.30335	-4.35276	1.34432e-05	0.0002118	CRC_vs_HC
hsa-let-7a-5p.iso.t5:0.seed:0.t3:tt.ad:AAC.mm:0	0.161427	-1.31043	3.27064	-0.400664	0.688668		CRC_vs_HC
hsa-let-7a-5p.iso.t5:0.seed:0.t3:tt.ad:AAG.mm:0	0.158737	-0.738003	1.36937	-0.538937	0.58993		CRC_vs_HC
hsa-let-7a-5p.iso.t5:0.seed:0.t3:tt.ad:AAT.mm:0	0.613738	-1.2206	0.673588	-1.81209	0.0699717	0.197301	CRC_vs_HC
hsa-let-7a-5p.iso.t5:0.seed:0.t3:tt.ad:AC.mm:0	0.125504	-1.24851	1.94897	-0.640598	0.521784		CRC_vs_HC
hsa-let-7a-5p.iso.t5:0.seed:0.t3:tt.ad:AG.mm:0	0.169678	-1.50963	1.23344	-1.22392	0.220983		CRC_vs_HC
hsa-let-7a-5p.iso.t5:0.seed:0.t3:tt.ad:AGA.mm:0	0.283665	-1.56539	0.831859	-1.88179	0.0598642		CRC_vs_HC
hsa-let-7a-5p.iso.t5:0.seed:0.t3:tt.ad:AGT.mm:0	0.0709921	-1.00213	3.03314	-0.330393	0.741103		CRC_vs_HC
hsa-let-7a-5p.iso.t5:0.seed:0.t3:tt.ad:AT.mm:0	10.9206	0.47034	0.230122	2.04387	0.0409659	0.134224	CRC_vs_HC
hsa-let-7a-5p.iso.t5:0.seed:0.t3:tt.ad:ATA.mm:0	0.663454	-0.690728	0.50582	-1.36556	0.172077	0.365385	CRC_vs_HC
hsa-let-7a-5p.iso.t5:0.seed:0.t3:tt.ad:ATT.mm:0	1.10086	0.403863	0.423839	0.952868	0.340657	0.55734	CRC_vs_HC
hsa-let-7a-5p.iso.t5:0.seed:0.t3:tt.ad:C.mm:0	0.992904	-0.51501	0.512016	-1.00585	0.314489	0.533929	CRC_vs_HC
hsa-let-7a-5p.iso.t5:0.seed:0.t3:tt.ad:CA.mm:0	0.416416	-0.640183	0.684035	-0.935892	0.349329	0.565202	CRC_vs_HC
hsa-let-7a-5p.iso.t5:0.seed:0.t3:tt.ad:CC.mm:0	0.0572217	-0.818868	3.81634	-0.214569	0.830103		CRC_vs_HC
hsa-let-7a-5p.iso.t5:0.seed:0.t3:tt.ad:CT.mm:0	21.156	-0.966773	0.342251	-2.82475	0.00473181	0.026567	CRC_vs_HC
hsa-let-7a-5p.iso.t5:0.seed:0.t3:tt.ad:CTA.mm:0	0.665234	-1.00983	0.647211	-1.56028	0.118693	0.285328	CRC_vs_HC
hsa-let-7a-5p.iso.t5:0.seed:0.t3:tt.ad:CTG.mm:0	0.0423438	-0.860276	3.81643	-0.225414	0.821657		CRC_vs_HC
hsa-let-7a-5p.iso.t5:0.seed:0.t3:tt.ad:CTT.mm:0	1.21932	-1.04613	0.56302	-1.85807	0.0631591	0.183107	CRC_vs_HC
hsa-let-7a-5p.iso.t5:0.seed:0.t3:tt.ad:G.mm:0	4.0096	-0.704126	0.336268	-2.09394	0.0362652	0.122142	CRC_vs_HC
hsa-let-7a-5p.iso.t5:0.seed:0.t3:tt.ad:GA.mm:0	0.250753	-1.48439	0.932978	-1.59102	0.111604		CRC_vs_HC
hsa-let-7a-5p.iso.t5:0.seed:0.t3:tt.ad:GT.mm:0	8.38459	-1.00797	0.254475	-3.96099	7.46408e-05	0.000900355	CRC_vs_HC
hsa-let-7a-5p.iso.t5:0.seed:0.t3:tt.ad:GTA.mm:0	0.693505	-1.21307	0.574592	-2.11118	0.0347567	0.118464	CRC_vs_HC
hsa-let-7a-5p.iso.t5:0.seed:0.t3:tt.ad:GTT.mm:0	0.766617	-0.734565	0.528772	-1.38919	0.164774	0.35464	CRC_vs_HC
hsa-let-7a-5p.iso.t5:0.seed:0.t3:TT.ad:T.mm:0	0.893569	-0.678983	0.50368	-1.34804	0.177644	0.373171	CRC_vs_HC
hsa-let-7a-5p.iso.t5:0.seed:0.t3:TT.ad:TT.mm:0	0.18566	-0.841162	0.896361	-0.938419	0.348029		CRC_vs_HC
hsa-let-7a-5p.iso.t5:0.seed:0.t3:TT.ad:TTT.mm:0	0.0861757	-0.857014	2.25654	-0.379791	0.7041		CRC_vs_HC
hsa-let-7a-5p.iso.t5:0.seed:0.t3:TTA.ad:TTT.mm:0	0.016785	-0.667353	3.81647	-0.174861	0.861189		CRC_vs_HC
hsa-let-7a-5p.iso.t5:A.seed:0.t3:0.ad:0.mm:0	2.31329	-0.374592	0.34016	-1.10122	0.2708	0.485858	CRC_vs_HC
hsa-let-7a-5p.iso.t5:A.seed:0.t3:t.ad:0.mm:0	0.554536	-1.03104	0.630209	-1.63604	0.101832	0.255834	CRC_vs_HC
hsa-let-7a-5p.iso.t5:A.seed:0.t3:T.ad:0.mm:0	0.131521	-0.859087	2.46406	-0.348647	0.727355		CRC_vs_HC
hsa-let-7a-5p.iso.t5:A.seed:0.t3:t.ad:A.mm:0	0.0844494	-1.07628	3.81641	-0.282013	0.777934		CRC_vs_HC
hsa-let-7a-5p.iso.t5:A.seed:0.t3:tt.ad:0.mm:0	0.0193918	-1.05893	3.81636	-0.277472	0.781418		CRC_vs_HC
hsa-let-7a-5p.iso.t5:G.seed:0.t3:0.ad:0.mm:0	10.1419	0.209824	0.284334	0.73795	0.460545	0.668669	CRC_vs_HC
hsa-let-7a-5p.iso.t5:G.seed:0.t3:0.ad:A.mm:0	0.0600326	-0.525421	2.64124	-0.19893	0.842318		CRC_vs_HC
hsa-let-7a-5p.iso.t5:G.seed:0.t3:t.ad:0.mm:0	10.2529	0.100699	0.312161	0.322586	0.747009	0.871605	CRC_vs_HC
hsa-let-7a-5p.iso.t5:G.seed:0.t3:T.ad:0.mm:0	2.03906	-0.140868	0.33775	-0.417078	0.676621	0.828626	CRC_vs_HC
hsa-let-7a-5p.iso.t5:G.seed:0.t3:t.ad:A.mm:0	0.118389	-0.583888	1.80507	-0.32347	0.746339		CRC_vs_HC
hsa-let-7a-5p.iso.t5:G.seed:0.t3:tt.ad:0.mm:0	1.1288	-0.0468086	0.478547	-0.0978138	0.92208	0.961675	CRC_vs_HC
hsa-let-7a-5p.iso.t5:GA.seed:0.t3:0.ad:0.mm:0	0.276005	-0.0186626	0.977295	-0.0190961	0.984764		CRC_vs_HC
hsa-let-7a-5p.iso.t5:GG.seed:0.t3:0.ad:0.mm:0	0.488418	0.108243	0.769397	0.140686	0.888118	0.944018	CRC_vs_HC
hsa-let-7a-5p.iso.t5:GG.seed:0.t3:t.ad:0.mm:0	0.109191	-0.918276	3.42621	-0.268015	0.788688		CRC_vs_HC
hsa-let-7a-5p.iso.t5:GGG.seed:0.t3:0.ad:0.mm:0	1.75464	0.0525041	0.463061	0.113385	0.909725	0.956025	CRC_vs_HC
hsa-let-7a-5p.iso.t5:GGG.seed:0.t3:t.ad:0.mm:0	0.270418	-0.382636	1.19653	-0.319789	0.749128		CRC_vs_HC
hsa-let-7a-5p.iso.t5:GGG.seed:0.t3:T.ad:0.mm:0	0.0683005	-0.717728	3.0456	-0.235661	0.813696		CRC_vs_HC
hsa-let-7a-5p.iso.t5:t.seed:0.t3:0.ad:0.mm:0	3.71659	0.43354	0.282751	1.5333	0.125203	0.29591	CRC_vs_HC
hsa-let-7a-5p.iso.t5:T.seed:0.t3:0.ad:0.mm:0	1.56782	0.876196	0.340508	2.5732	0.0100763	0.0476608	CRC_vs_HC
hsa-let-7a-5p.iso.t5:t.seed:0.t3:0.ad:A.mm:0	0.276567	-0.970033	0.860394	-1.12743	0.259561		CRC_vs_HC
hsa-let-7a-5p.iso.t5:t.seed:0.t3:t.ad:0.mm:0	0.56043	0.0814306	0.723481	0.112554	0.910384	0.95612	CRC_vs_HC
hsa-let-7a-5p.iso.t5:T.seed:0.t3:t.ad:0.mm:0	0.772953	-0.613543	0.629511	-0.974636	0.329741	0.548452	CRC_vs_HC
hsa-let-7a-5p.iso.t5:t.seed:0.t3:tt.ad:0.mm:0	0.035023	-0.609243	3.81641	-0.159638	0.873166		CRC_vs_HC
hsa-let-7a-5p.iso.t5:T.seed:0.t3:tt.ad:0.mm:0	0.0883926	-0.858242	3.81642	-0.224881	0.822072		CRC_vs_HC
hsa-let-7a-5p.iso.t5:tga.seed:0.t3:0.ad:0.mm:0	5.0806	-0.833233	0.504404	-1.65192	0.0985518	0.250934	CRC_vs_HC
hsa-let-7a-5p.iso.t5:tga.seed:0.t3:0.ad:A.mm:0	0.308562	0.085679	1.0323	0.0829981	0.933853		CRC_vs_HC
hsa-let-7a-5p.iso.t5:tga.seed:0.t3:t.ad:0.mm:0	1.36804	-0.707866	0.690002	-1.02589	0.304943	0.524276	CRC_vs_HC
hsa-let-7a-5p.iso.t5:tga.seed:0.t3:T.ad:0.mm:0	0.235173	-0.787751	1.03445	-0.761514	0.44635		CRC_vs_HC
hsa-let-7a-5p.iso.t5:tga.seed:0.t3:t.ad:A.mm:0	0.0351824	0	3.8164	0	1		CRC_vs_HC
hsa-let-7a-5p.ref.t5:0.seed:0.t3:0.ad:0.mm:0	48108.8	-0.599399	0.124203	-4.82595	1.3934e-06	3.02406e-05	CRC_vs_HC
hsa-let-7b-3p.iso.t5:0.seed:0.t3:c.ad:0.mm:0	25.3937	0.121665	0.131998	0.921719	0.356675	0.572701	CRC_vs_HC
hsa-let-7b-3p.iso.t5:0.seed:0.t3:c.ad:A.mm:0	2.68443	0.932248	0.298624	3.12181	0.0017974	0.0122564	CRC_vs_HC
hsa-let-7b-3p.iso.t5:0.seed:0.t3:c.ad:AA.mm:0	0.147839	0.297945	1.35088	0.220557	0.825437		CRC_vs_HC
hsa-let-7b-3p.iso.t5:0.seed:0.t3:c.ad:AAT.mm:0	0.0161063	-0.872701	3.81635	-0.228674	0.819122		CRC_vs_HC
hsa-let-7b-3p.iso.t5:0.seed:0.t3:c.ad:AT.mm:0	0.0428282	-0.373989	3.81633	-0.0979971	0.921935		CRC_vs_HC
hsa-let-7b-3p.iso.t5:0.seed:0.t3:c.ad:G.mm:0	0.511333	0.136119	0.761443	0.178764	0.858123	0.927874	CRC_vs_HC
hsa-let-7b-3p.iso.t5:0.seed:0.t3:c.ad:T.mm:0	76.5894	0.296046	0.151882	1.94918	0.0512735	0.157837	CRC_vs_HC
hsa-let-7b-3p.iso.t5:0.seed:0.t3:c.ad:TA.mm:0	0.432789	0.954456	0.716119	1.33282	0.182592	0.379291	CRC_vs_HC
hsa-let-7b-3p.iso.t5:0.seed:0.t3:c.ad:TAT.mm:0	0.0858594	-0.412541	2.5724	-0.160372	0.872588		CRC_vs_HC
hsa-let-7b-3p.iso.t5:0.seed:0.t3:c.ad:TT.mm:0	0.813244	0.269526	0.543636	0.495784	0.620047	0.789399	CRC_vs_HC
hsa-let-7b-3p.iso.t5:0.seed:0.t3:c.ad:TTT.mm:0	0.161789	-0.950421	1.45165	-0.654716	0.512651		CRC_vs_HC
hsa-let-7b-3p.iso.t5:0.seed:0.t3:cc.ad:0.mm:0	4.37917	0.310151	0.259652	1.19449	0.232286	0.439739	CRC_vs_HC
hsa-let-7b-3p.iso.t5:0.seed:0.t3:cc.ad:A.mm:0	0.134028	-0.752024	1.45811	-0.515752	0.606028		CRC_vs_HC
hsa-let-7b-3p.iso.t5:0.seed:0.t3:cc.ad:AT.mm:0	0.186636	0.0399426	1.0025	0.0398431	0.968218		CRC_vs_HC
hsa-let-7b-3p.iso.t5:0.seed:0.t3:cc.ad:G.mm:0	0.034944	-1.30023	3.81597	-0.340733	0.733305		CRC_vs_HC
hsa-let-7b-3p.iso.t5:0.seed:0.t3:cc.ad:T.mm:0	6.83901	-0.274634	0.238902	-1.14956	0.250323	0.460994	CRC_vs_HC
hsa-let-7b-3p.iso.t5:0.seed:0.t3:cc.ad:TA.mm:0	0.15101	0.481787	1.75241	0.274929	0.783371		CRC_vs_HC
hsa-let-7b-3p.iso.t5:0.seed:0.t3:cc.ad:TT.mm:0	3.26995	0.334757	0.265209	1.26224	0.206864	0.409409	CRC_vs_HC
hsa-let-7b-3p.iso.t5:0.seed:0.t3:cc.ad:TTT.mm:0	0.253637	0.0711836	0.875192	0.0813349	0.935176		CRC_vs_HC
hsa-let-7b-3p.iso.t5:0.seed:0.t3:ccc.ad:0.mm:0	0.495064	0.0318663	0.62466	0.0510138	0.959314	0.979247	CRC_vs_HC
hsa-let-7b-3p.iso.t5:0.seed:0.t3:ccc.ad:GCT.mm:0	0.0180071	-0.767426	3.81637	-0.201088	0.84063		CRC_vs_HC
hsa-let-7b-3p.iso.t5:0.seed:0.t3:ccc.ad:TT.mm:0	0.149794	-1.46371	2.16026	-0.67756	0.498051		CRC_vs_HC
hsa-let-7b-3p.iso.t5:0.seed:0.t3:ccc.ad:TTT.mm:0	0.140996	-0.0518579	1.33775	-0.0387649	0.969078		CRC_vs_HC
hsa-let-7b-3p.iso.t5:c.seed:0.t3:c.ad:0.mm:0	0.327127	-0.0769661	0.900084	-0.0855099	0.931856		CRC_vs_HC
hsa-let-7b-3p.iso.t5:c.seed:0.t3:c.ad:A.mm:0	0.0901363	-0.386332	3.48016	-0.11101	0.911608		CRC_vs_HC
hsa-let-7b-3p.iso.t5:c.seed:0.t3:c.ad:T.mm:0	1.85293	-0.684178	0.418428	-1.63512	0.102025	0.256125	CRC_vs_HC
hsa-let-7b-3p.iso.t5:c.seed:0.t3:cc.ad:T.mm:0	0.105527	-0.555345	1.48008	-0.375213	0.707502		CRC_vs_HC
hsa-let-7b-3p.iso.t5:ct.seed:0.t3:c.ad:0.mm:0	0.0327899	-0.64378	3.81646	-0.168685	0.866045		CRC_vs_HC
hsa-let-7b-3p.iso.t5:ct.seed:0.t3:c.ad:T.mm:0	0.100982	-1.34283	3.43748	-0.390644	0.696061		CRC_vs_HC
hsa-let-7b-5p.iso.t5:0.seed:0.t3:0.ad:A.mm:0	609.317	-0.224526	0.133641	-1.68007	0.0929435	0.241591	CRC_vs_HC
hsa-let-7b-5p.iso.t5:0.seed:0.t3:0.ad:AA.mm:0	113.421	-0.108489	0.156656	-0.692527	0.488606	0.693937	CRC_vs_HC
hsa-let-7b-5p.iso.t5:0.seed:0.t3:0.ad:AAA.mm:0	11.9073	0.462178	0.25664	1.80088	0.0717218	0.20023	CRC_vs_HC
hsa-let-7b-5p.iso.t5:0.seed:0.t3:0.ad:AAC.mm:0	0.681045	0.481507	0.584649	0.823582	0.410177	0.622552	CRC_vs_HC
hsa-let-7b-5p.iso.t5:0.seed:0.t3:0.ad:AAG.mm:0	2.75793	0.225775	0.39416	0.572801	0.566779	0.751044	CRC_vs_HC
hsa-let-7b-5p.iso.t5:0.seed:0.t3:0.ad:AAT.mm:0	13.5179	0.186905	0.240507	0.77713	0.437082	0.647443	CRC_vs_HC
hsa-let-7b-5p.iso.t5:0.seed:0.t3:0.ad:AC.mm:0	2.29705	-0.110775	0.429845	-0.257709	0.796632	0.899355	CRC_vs_HC
hsa-let-7b-5p.iso.t5:0.seed:0.t3:0.ad:ACT.mm:0	0.612865	-0.785203	0.658169	-1.19301	0.232865	0.440155	CRC_vs_HC
hsa-let-7b-5p.iso.t5:0.seed:0.t3:0.ad:AG.mm:0	20.9516	-0.48574	0.195769	-2.48118	0.0130948	0.0576255	CRC_vs_HC
hsa-let-7b-5p.iso.t5:0.seed:0.t3:0.ad:AGA.mm:0	3.48453	0.258939	0.310841	0.833029	0.404828	0.61773	CRC_vs_HC
hsa-let-7b-5p.iso.t5:0.seed:0.t3:0.ad:AGC.mm:0	0.145746	-0.452405	1.48656	-0.304331	0.760876		CRC_vs_HC
hsa-let-7b-5p.iso.t5:0.seed:0.t3:0.ad:AGG.mm:0	0.200431	-0.791134	2.38654	-0.331499	0.740268		CRC_vs_HC
hsa-let-7b-5p.iso.t5:0.seed:0.t3:0.ad:AGT.mm:0	3.76824	-0.166162	0.306204	-0.542651	0.58737	0.767537	CRC_vs_HC
hsa-let-7b-5p.iso.t5:0.seed:0.t3:0.ad:AT.mm:0	247.23	-0.448924	0.165446	-2.71342	0.00665918	0.0347357	CRC_vs_HC
hsa-let-7b-5p.iso.t5:0.seed:0.t3:0.ad:ATA.mm:0	2.49078	-0.167087	0.354914	-0.470782	0.637796	0.80248	CRC_vs_HC
hsa-let-7b-5p.iso.t5:0.seed:0.t3:0.ad:ATC.mm:0	0.263588	-0.746191	1.14991	-0.648911	0.516396		CRC_vs_HC
hsa-let-7b-5p.iso.t5:0.seed:0.t3:0.ad:ATG.mm:0	0.274071	-0.756092	1.44156	-0.524496	0.599933		CRC_vs_HC
hsa-let-7b-5p.iso.t5:0.seed:0.t3:0.ad:ATT.mm:0	13.0893	-0.48797	0.216328	-2.25569	0.02409	0.0906877	CRC_vs_HC
hsa-let-7b-5p.iso.t5:0.seed:0.t3:0.ad:C.mm:0	6.58557	-0.6093	0.264037	-2.30764	0.0210194	0.0822059	CRC_vs_HC
hsa-let-7b-5p.iso.t5:0.seed:0.t3:0.ad:CA.mm:0	0.50512	-1.06118	0.703015	-1.50947	0.131178	0.305621	CRC_vs_HC
hsa-let-7b-5p.iso.t5:0.seed:0.t3:0.ad:CAA.mm:0	0.0628725	-0.936941	3.6288	-0.258195	0.796256		CRC_vs_HC
hsa-let-7b-5p.iso.t5:0.seed:0.t3:0.ad:CAT.mm:0	0.0695054	-0.59433	3.5919	-0.165464	0.868579		CRC_vs_HC
hsa-let-7b-5p.iso.t5:0.seed:0.t3:0.ad:CT.mm:0	3.25889	-0.195738	0.329693	-0.593697	0.552715	0.740914	CRC_vs_HC
hsa-let-7b-5p.iso.t5:0.seed:0.t3:0.ad:G.mm:0	100.463	-0.435336	0.172686	-2.52098	0.011703	0.0532521	CRC_vs_HC
hsa-let-7b-5p.iso.t5:0.seed:0.t3:0.ad:GA.mm:0	12.6713	-0.610234	0.201494	-3.02855	0.00245732	0.0157806	CRC_vs_HC
hsa-let-7b-5p.iso.t5:0.seed:0.t3:0.ad:GAA.mm:0	0.910597	-0.315579	0.504524	-0.625498	0.531644	0.727222	CRC_vs_HC
hsa-let-7b-5p.iso.t5:0.seed:0.t3:0.ad:GAT.mm:0	0.63933	-0.446213	0.553461	-0.806224	0.420114	0.63055	CRC_vs_HC
hsa-let-7b-5p.iso.t5:0.seed:0.t3:0.ad:GT.mm:0	27.4193	-0.54257	0.207762	-2.6115	0.00901458	0.0437492	CRC_vs_HC
hsa-let-7b-5p.iso.t5:0.seed:0.t3:0.ad:GTA.mm:0	0.402496	-0.830464	0.791908	-1.04869	0.294322		CRC_vs_HC
hsa-let-7b-5p.iso.t5:0.seed:0.t3:0.ad:GTT.mm:0	0.997364	-0.971045	0.534275	-1.8175	0.0691407	0.195365	CRC_vs_HC
hsa-let-7b-5p.iso.t5:0.seed:0.t3:gtt.ad:0.mm:0	30.3833	-0.837844	0.159286	-5.25999	1.44063e-07	4.44867e-06	CRC_vs_HC
hsa-let-7b-5p.iso.t5:0.seed:0.t3:gtt.ad:A.mm:0	23.4276	-1.35729	0.192545	-7.04921	1.79942e-12	2.64132e-10	CRC_vs_HC
hsa-let-7b-5p.iso.t5:0.seed:0.t3:gtt.ad:AA.mm:0	8.40263	-1.38435	0.23278	-5.94704	2.73037e-09	1.45369e-07	CRC_vs_HC
hsa-let-7b-5p.iso.t5:0.seed:0.t3:gtt.ad:AAA.mm:0	5.80685	-1.52916	0.333092	-4.5908	4.4155e-06	8.14381e-05	CRC_vs_HC
hsa-let-7b-5p.iso.t5:0.seed:0.t3:gtt.ad:AAG.mm:0	0.291868	-1.86318	0.914281	-2.03786	0.0415639		CRC_vs_HC
hsa-let-7b-5p.iso.t5:0.seed:0.t3:gtt.ad:AAT.mm:0	0.627122	-2.03055	0.702014	-2.89246	0.00382232	0.0224033	CRC_vs_HC
hsa-let-7b-5p.iso.t5:0.seed:0.t3:gtt.ad:AC.mm:0	0.0449489	-1.26258	3.17582	-0.397561	0.690953		CRC_vs_HC
hsa-let-7b-5p.iso.t5:0.seed:0.t3:gtt.ad:AG.mm:0	0.155274	0.019648	1.34501	0.014608	0.988345		CRC_vs_HC
hsa-let-7b-5p.iso.t5:0.seed:0.t3:gtt.ad:AGA.mm:0	0.200094	-1.289	0.901986	-1.42907	0.152985		CRC_vs_HC
hsa-let-7b-5p.iso.t5:0.seed:0.t3:gtt.ad:AT.mm:0	0.680693	-1.6741	0.581418	-2.87933	0.00398521	0.0232195	CRC_vs_HC
hsa-let-7b-5p.iso.t5:0.seed:0.t3:gtt.ad:ATT.mm:0	1.1591	0.263285	0.548559	0.479957	0.631258	0.797515	CRC_vs_HC
hsa-let-7b-5p.iso.t5:0.seed:0.t3:gtt.ad:C.mm:0	0.186991	-0.976427	1.42971	-0.682956	0.494635		CRC_vs_HC
hsa-let-7b-5p.iso.t5:0.seed:0.t3:gtt.ad:CA.mm:0	0.124103	-0.904636	3.8161	-0.237057	0.812612		CRC_vs_HC
hsa-let-7b-5p.iso.t5:0.seed:0.t3:gtt.ad:CAA.mm:0	0.0572881	-1.0085	3.66952	-0.274832	0.783445		CRC_vs_HC
hsa-let-7b-5p.iso.t5:0.seed:0.t3:gtt.ad:CT.mm:0	0.193452	-1.07016	1.15348	-0.927764	0.35353		CRC_vs_HC
hsa-let-7b-5p.iso.t5:0.seed:0.t3:gtt.ad:CTT.mm:0	0.960932	-1.12218	0.605614	-1.85296	0.063888	0.184675	CRC_vs_HC
hsa-let-7b-5p.iso.t5:0.seed:0.t3:gtt.ad:T.mm:0	19.6981	-0.873971	0.207855	-4.20471	2.61415e-05	0.000369329	CRC_vs_HC
hsa-let-7b-5p.iso.t5:0.seed:0.t3:gtt.ad:TA.mm:0	0.426249	-1.1197	0.696198	-1.60831	0.107768	0.265684	CRC_vs_HC
hsa-let-7b-5p.iso.t5:0.seed:0.t3:gtt.ad:TAA.mm:0	0.578213	-1.67495	0.877683	-1.90838	0.0563421	0.168595	CRC_vs_HC
hsa-let-7b-5p.iso.t5:0.seed:0.t3:gtt.ad:TAT.mm:0	0.171027	-0.703834	2.42609	-0.290111	0.771732		CRC_vs_HC
hsa-let-7b-5p.iso.t5:0.seed:0.t3:gtt.ad:TT.mm:0	1.04232	0.379666	0.471465	0.805289	0.420653	0.631101	CRC_vs_HC
hsa-let-7b-5p.iso.t5:0.seed:0.t3:gtt.ad:TTA.mm:0	0.13217	-0.940445	1.45876	-0.644688	0.519129		CRC_vs_HC
hsa-let-7b-5p.iso.t5:0.seed:0.t3:gtt.ad:TTT.mm:0	1.70832	-0.689284	0.449928	-1.53199	0.125526	0.296348	CRC_vs_HC
hsa-let-7b-5p.iso.t5:0.seed:0.t3:t.ad:0.mm:0	1107.73	-0.447089	0.130296	-3.43134	0.000600605	0.00495901	CRC_vs_HC
hsa-let-7b-5p.iso.t5:0.seed:0.t3:T.ad:0.mm:0	1598.73	-0.284365	0.152718	-1.86202	0.0625996	0.1819	CRC_vs_HC
hsa-let-7b-5p.iso.t5:0.seed:0.t3:t.ad:A.mm:0	140.499	-0.428858	0.189021	-2.26884	0.0232781	0.0884871	CRC_vs_HC
hsa-let-7b-5p.iso.t5:0.seed:0.t3:T.ad:A.mm:0	38.9192	0.0684265	0.191528	0.357266	0.720892	0.856936	CRC_vs_HC
hsa-let-7b-5p.iso.t5:0.seed:0.t3:t.ad:AA.mm:0	79.8121	-0.709377	0.165036	-4.29832	1.721e-05	0.000261611	CRC_vs_HC
hsa-let-7b-5p.iso.t5:0.seed:0.t3:T.ad:AA.mm:0	5.64719	0.617185	0.314552	1.96211	0.0497501	0.154467	CRC_vs_HC
hsa-let-7b-5p.iso.t5:0.seed:0.t3:t.ad:AAA.mm:0	7.63985	-0.636458	0.240875	-2.64228	0.00823505	0.040697	CRC_vs_HC
hsa-let-7b-5p.iso.t5:0.seed:0.t3:T.ad:AAA.mm:0	1.80435	0.874943	0.413244	2.11726	0.0342381	0.117736	CRC_vs_HC
hsa-let-7b-5p.iso.t5:0.seed:0.t3:t.ad:AAC.mm:0	0.43898	-0.41532	0.699709	-0.593561	0.552806	0.740914	CRC_vs_HC
hsa-let-7b-5p.iso.t5:0.seed:0.t3:T.ad:AAC.mm:0	0.0738668	-0.201837	2.02689	-0.0995797	0.920678		CRC_vs_HC
hsa-let-7b-5p.iso.t5:0.seed:0.t3:t.ad:AAG.mm:0	2.08167	-1.07268	0.353574	-3.03382	0.00241479	0.0155908	CRC_vs_HC
hsa-let-7b-5p.iso.t5:0.seed:0.t3:T.ad:AAG.mm:0	0.463756	0.811769	0.801242	1.01314	0.310994	0.531167	CRC_vs_HC
hsa-let-7b-5p.iso.t5:0.seed:0.t3:t.ad:AAT.mm:0	8.74936	-0.0290775	0.226788	-0.128214	0.897979	0.949525	CRC_vs_HC
hsa-let-7b-5p.iso.t5:0.seed:0.t3:T.ad:AAT.mm:0	3.0863	0.693257	0.448812	1.54465	0.122431	0.291976	CRC_vs_HC
hsa-let-7b-5p.iso.t5:0.seed:0.t3:t.ad:AC.mm:0	1.98352	-0.649193	0.457473	-1.41908	0.155875	0.342696	CRC_vs_HC
hsa-let-7b-5p.iso.t5:0.seed:0.t3:T.ad:AC.mm:0	0.176112	-0.7302	2.14923	-0.339749	0.734046		CRC_vs_HC
hsa-let-7b-5p.iso.t5:0.seed:0.t3:T.ad:ACA.mm:0	0.0637227	-0.55033	3.81633	-0.144204	0.885339		CRC_vs_HC
hsa-let-7b-5p.iso.t5:0.seed:0.t3:t.ad:ACG.mm:0	0.0233764	-1.15688	3.81633	-0.303139	0.761784		CRC_vs_HC
hsa-let-7b-5p.iso.t5:0.seed:0.t3:t.ad:ACT.mm:0	0.288346	-0.591697	0.812731	-0.728035	0.466592		CRC_vs_HC
hsa-let-7b-5p.iso.t5:0.seed:0.t3:T.ad:ACT.mm:0	0.146175	-1.00243	1.57369	-0.636994	0.524129		CRC_vs_HC
hsa-let-7b-5p.iso.t5:0.seed:0.t3:t.ad:AG.mm:0	16.0136	-0.583443	0.206136	-2.83038	0.00464935	0.0262129	CRC_vs_HC
hsa-let-7b-5p.iso.t5:0.seed:0.t3:t.ad:AGA.mm:0	3.61061	-1.21203	0.272922	-4.44093	8.95715e-06	0.000149435	CRC_vs_HC
hsa-let-7b-5p.iso.t5:0.seed:0.t3:T.ad:AGA.mm:0	0.784115	0.637355	0.502709	1.26784	0.204855	0.406923	CRC_vs_HC
hsa-let-7b-5p.iso.t5:0.seed:0.t3:t.ad:AGT.mm:0	2.5899	-0.495112	0.300194	-1.6493	0.0990856	0.251625	CRC_vs_HC
hsa-let-7b-5p.iso.t5:0.seed:0.t3:T.ad:AGT.mm:0	0.596847	-0.234058	0.553987	-0.422498	0.672661	0.826026	CRC_vs_HC
hsa-let-7b-5p.iso.t5:0.seed:0.t3:t.ad:AT.mm:0	102.36	-0.645119	0.192907	-3.34419	0.000825239	0.00650086	CRC_vs_HC
hsa-let-7b-5p.iso.t5:0.seed:0.t3:T.ad:AT.mm:0	11.9442	-0.309948	0.279067	-1.11066	0.266717	0.480927	CRC_vs_HC
hsa-let-7b-5p.iso.t5:0.seed:0.t3:t.ad:ATA.mm:0	0.892155	-0.474633	0.533802	-0.889156	0.373919	0.590146	CRC_vs_HC
hsa-let-7b-5p.iso.t5:0.seed:0.t3:T.ad:ATA.mm:0	0.143215	-0.422895	1.60599	-0.263323	0.792302		CRC_vs_HC
hsa-let-7b-5p.iso.t5:0.seed:0.t3:t.ad:ATC.mm:0	0.148588	-0.6396	1.74898	-0.365698	0.71459		CRC_vs_HC
hsa-let-7b-5p.iso.t5:0.seed:0.t3:t.ad:ATG.mm:0	0.307366	-1.06473	0.882104	-1.20704	0.227417		CRC_vs_HC
hsa-let-7b-5p.iso.t5:0.seed:0.t3:t.ad:ATT.mm:0	6.04144	-0.780351	0.285985	-2.72865	0.00635945	0.0334664	CRC_vs_HC
hsa-let-7b-5p.iso.t5:0.seed:0.t3:T.ad:ATT.mm:0	1.58002	-0.56424	0.516089	-1.0933	0.274262	0.488985	CRC_vs_HC
hsa-let-7b-5p.iso.t5:0.seed:0.t3:t.ad:C.mm:0	0.530422	0.468985	0.57768	0.811843	0.416882	0.628054	CRC_vs_HC
hsa-let-7b-5p.iso.t5:0.seed:0.t3:t.ad:CA.mm:0	0.614298	-0.490742	0.801583	-0.612215	0.540395	0.733216	CRC_vs_HC
hsa-let-7b-5p.iso.t5:0.seed:0.t3:t.ad:CT.mm:0	0.480984	-0.388552	0.69077	-0.56249	0.573782	0.75639	CRC_vs_HC
hsa-let-7b-5p.iso.t5:0.seed:0.t3:t.ad:G.mm:0	8.48187	-0.244751	0.246442	-0.993141	0.320641	0.540048	CRC_vs_HC
hsa-let-7b-5p.iso.t5:0.seed:0.t3:T.ad:G.mm:0	9.18084	-0.694895	0.228397	-3.04248	0.00234635	0.015221	CRC_vs_HC
hsa-let-7b-5p.iso.t5:0.seed:0.t3:t.ad:GA.mm:0	2.85703	-0.826363	0.289992	-2.8496	0.00437739	0.0249925	CRC_vs_HC
hsa-let-7b-5p.iso.t5:0.seed:0.t3:T.ad:GA.mm:0	1.12923	0.155542	0.571933	0.271959	0.785653	0.893355	CRC_vs_HC
hsa-let-7b-5p.iso.t5:0.seed:0.t3:t.ad:GAA.mm:0	0.239752	0.160704	0.76301	0.210618	0.833185		CRC_vs_HC
hsa-let-7b-5p.iso.t5:0.seed:0.t3:T.ad:GAA.mm:0	0.192449	-0.286902	1.4674	-0.195517	0.844988		CRC_vs_HC
hsa-let-7b-5p.iso.t5:0.seed:0.t3:t.ad:GAC.mm:0	0.0148783	0	3.81643	0	1		CRC_vs_HC
hsa-let-7b-5p.iso.t5:0.seed:0.t3:t.ad:GAT.mm:0	0.221598	-1.47895	0.954029	-1.55022	0.121089		CRC_vs_HC
hsa-let-7b-5p.iso.t5:0.seed:0.t3:T.ad:GAT.mm:0	0.206937	-0.769604	1.43169	-0.537548	0.590889		CRC_vs_HC
hsa-let-7b-5p.iso.t5:0.seed:0.t3:t.ad:GT.mm:0	2.72403	0.0329931	0.323605	0.101955	0.918793	0.960518	CRC_vs_HC
hsa-let-7b-5p.iso.t5:0.seed:0.t3:T.ad:GT.mm:0	2.39508	-0.978693	0.369012	-2.6522	0.00799697	0.0398117	CRC_vs_HC
hsa-let-7b-5p.iso.t5:0.seed:0.t3:t.ad:GTT.mm:0	0.102651	-0.788943	1.78949	-0.440876	0.659302		CRC_vs_HC
hsa-let-7b-5p.iso.t5:0.seed:0.t3:T.ad:GTT.mm:0	0.167162	-0.470902	1.15583	-0.407413	0.683705		CRC_vs_HC
hsa-let-7b-5p.iso.t5:0.seed:0.t3:T.ad:T.mm:0	196.685	-0.310794	0.188399	-1.64966	0.0990128	0.2515	CRC_vs_HC
hsa-let-7b-5p.iso.t5:0.seed:0.t3:T.ad:TA.mm:0	3.83738	-0.00352024	0.37455	-0.00939857	0.992501	0.995911	CRC_vs_HC
hsa-let-7b-5p.iso.t5:0.seed:0.t3:T.ad:TAA.mm:0	0.748226	0.602735	0.587653	1.02566	0.30505	0.524329	CRC_vs_HC
hsa-let-7b-5p.iso.t5:0.seed:0.t3:T.ad:TAG.mm:0	0.137147	-0.415585	2.84166	-0.146247	0.883727		CRC_vs_HC
hsa-let-7b-5p.iso.t5:0.seed:0.t3:T.ad:TAT.mm:0	2.01191	-0.0291829	0.418724	-0.069695	0.944436	0.972062	CRC_vs_HC
hsa-let-7b-5p.iso.t5:0.seed:0.t3:T.ad:TC.mm:0	0.180747	-1.24027	1.44165	-0.860314	0.389616		CRC_vs_HC
hsa-let-7b-5p.iso.t5:0.seed:0.t3:T.ad:TG.mm:0	0.572175	-0.551327	0.667029	-0.826541	0.408497	0.620874	CRC_vs_HC
hsa-let-7b-5p.iso.t5:0.seed:0.t3:T.ad:TGT.mm:0	0.256451	-1.17825	0.966071	-1.21963	0.222605		CRC_vs_HC
hsa-let-7b-5p.iso.t5:0.seed:0.t3:T.ad:TT.mm:0	20.8369	-0.311793	0.251587	-1.23931	0.215232	0.419518	CRC_vs_HC
hsa-let-7b-5p.iso.t5:0.seed:0.t3:T.ad:TTA.mm:0	0.290952	-0.381662	0.749299	-0.509358	0.610501		CRC_vs_HC
hsa-let-7b-5p.iso.t5:0.seed:0.t3:T.ad:TTT.mm:0	6.19805	-0.398537	0.315884	-1.26166	0.207072	0.409715	CRC_vs_HC
hsa-let-7b-5p.iso.t5:0.seed:0.t3:TC.ad:0.mm:0	1.32553	-0.537045	0.466236	-1.15187	0.249373	0.459937	CRC_vs_HC
hsa-let-7b-5p.iso.t5:0.seed:0.t3:TC.ad:T.mm:0	0.43435	-0.497063	0.712552	-0.697582	0.485439	0.691346	CRC_vs_HC
hsa-let-7b-5p.iso.t5:0.seed:0.t3:TC.ad:TAT.mm:0	0.205613	-0.53366	1.00678	-0.530068	0.596065		CRC_vs_HC
hsa-let-7b-5p.iso.t5:0.seed:0.t3:TC.ad:TTT.mm:0	0.513429	-0.0420727	0.787133	-0.0534505	0.957373	0.978777	CRC_vs_HC
hsa-let-7b-5p.iso.t5:0.seed:0.t3:TCA.ad:0.mm:0	0.0607937	-0.448937	3.0768	-0.14591	0.883992		CRC_vs_HC
hsa-let-7b-5p.iso.t5:0.seed:0.t3:TCA.ad:AA.mm:0	0.256576	0.929078	0.993376	0.935273	0.349648		CRC_vs_HC
hsa-let-7b-5p.iso.t5:0.seed:0.t3:TCA.ad:AT.mm:0	0.429339	-0.683527	0.727711	-0.939284	0.347585	0.563731	CRC_vs_HC
hsa-let-7b-5p.iso.t5:0.seed:0.t3:TCA.ad:ATT.mm:0	0.0594453	-0.498737	3.81641	-0.130682	0.896027		CRC_vs_HC
hsa-let-7b-5p.iso.t5:0.seed:0.t3:TCA.ad:TT.mm:0	0.197664	-0.373729	1.45135	-0.257504	0.79679		CRC_vs_HC
hsa-let-7b-5p.iso.t5:0.seed:0.t3:TCA.ad:TTT.mm:0	0.032165	-0.69165	3.81644	-0.181229	0.856188		CRC_vs_HC
hsa-let-7b-5p.iso.t5:0.seed:0.t3:tt.ad:AA.mm:0	0.139894	-1.62495	1.7822	-0.911767	0.361891		CRC_vs_HC
hsa-let-7b-5p.iso.t5:0.seed:0.t3:tt.ad:AAA.mm:0	7.09774	-1.16356	0.279989	-4.15574	3.24233e-05	0.000443642	CRC_vs_HC
hsa-let-7b-5p.iso.t5:0.seed:0.t3:tt.ad:AAC.mm:0	0.19651	-0.861245	1.56462	-0.550448	0.582012		CRC_vs_HC
hsa-let-7b-5p.iso.t5:0.seed:0.t3:tt.ad:AAG.mm:0	0.738079	-1.41345	0.568948	-2.48432	0.01298	0.0572134	CRC_vs_HC
hsa-let-7b-5p.iso.t5:0.seed:0.t3:tt.ad:AAT.mm:0	0.0910601	-0.481273	1.614	-0.298187	0.765561		CRC_vs_HC
hsa-let-7b-5p.iso.t5:0.seed:0.t3:tt.ad:AG.mm:0	0.514055	-1.63142	0.655716	-2.488	0.0128465	0.0567816	CRC_vs_HC
hsa-let-7b-5p.iso.t5:0.seed:0.t3:tt.ad:AGA.mm:0	0.679254	-0.942647	0.637113	-1.47956	0.138991	0.317257	CRC_vs_HC
hsa-let-7b-5p.iso.t5:0.seed:0.t3:tt.ad:AGT.mm:0	0.137334	-0.924214	1.36231	-0.678419	0.497506		CRC_vs_HC
hsa-let-7b-5p.iso.t5:0.seed:0.t3:tt.ad:AT.mm:0	3.0464	-0.623778	0.261526	-2.38514	0.0170724	0.0704808	CRC_vs_HC
hsa-let-7b-5p.iso.t5:0.seed:0.t3:tt.ad:ATA.mm:0	0.398104	-0.30639	0.699795	-0.437829	0.661511		CRC_vs_HC
hsa-let-7b-5p.iso.t5:0.seed:0.t3:tt.ad:ATT.mm:0	1.01296	-0.355348	0.455998	-0.779275	0.435818	0.646146	CRC_vs_HC
hsa-let-7b-5p.iso.t5:0.seed:0.t3:tt.ad:C.mm:0	0.544727	-1.25962	0.794616	-1.58519	0.112924	0.275565	CRC_vs_HC
hsa-let-7b-5p.iso.t5:0.seed:0.t3:tt.ad:CA.mm:0	0.327493	-1.05161	1.01808	-1.03293	0.301637		CRC_vs_HC
hsa-let-7b-5p.iso.t5:0.seed:0.t3:tt.ad:CT.mm:0	2.88929	-0.310445	0.376865	-0.823757	0.410078	0.622489	CRC_vs_HC
hsa-let-7b-5p.iso.t5:0.seed:0.t3:tt.ad:CTA.mm:0	0.300143	-0.414678	0.80295	-0.516443	0.605545		CRC_vs_HC
hsa-let-7b-5p.iso.t5:0.seed:0.t3:tt.ad:CTT.mm:0	1.03006	-1.9765	0.615724	-3.21004	0.00132717	0.00956911	CRC_vs_HC
hsa-let-7b-5p.iso.t5:0.seed:0.t3:tt.ad:G.mm:0	2.15996	-0.714562	0.374847	-1.90628	0.056614	0.169122	CRC_vs_HC
hsa-let-7b-5p.iso.t5:0.seed:0.t3:tt.ad:GA.mm:0	0.101068	-0.722112	1.78396	-0.40478	0.685639		CRC_vs_HC
hsa-let-7b-5p.iso.t5:0.seed:0.t3:tt.ad:GAA.mm:0	0.0884103	-1.1522	2.0008	-0.57587	0.564703		CRC_vs_HC
hsa-let-7b-5p.iso.t5:0.seed:0.t3:tt.ad:GAT.mm:0	0.0691329	-0.49479	2.62584	-0.188432	0.850538		CRC_vs_HC
hsa-let-7b-5p.iso.t5:0.seed:0.t3:tt.ad:GT.mm:0	2.41306	-1.11106	0.330613	-3.36059	0.000777753	0.0061537	CRC_vs_HC
hsa-let-7b-5p.iso.t5:0.seed:0.t3:tt.ad:GTA.mm:0	0.257146	-1.0254	0.967505	-1.05984	0.289217		CRC_vs_HC
hsa-let-7b-5p.iso.t5:0.seed:0.t3:tt.ad:GTT.mm:0	1.34399	-0.453327	0.43603	-1.03967	0.298494	0.518086	CRC_vs_HC
hsa-let-7b-5p.iso.t5:G.seed:0.t3:0.ad:0.mm:0	3.91473	0.205068	0.26835	0.764182	0.444759	0.654809	CRC_vs_HC
hsa-let-7b-5p.iso.t5:G.seed:0.t3:0.ad:A.mm:0	0.350499	-0.857451	0.818416	-1.0477	0.294779		CRC_vs_HC
hsa-let-7b-5p.iso.t5:G.seed:0.t3:0.ad:AT.mm:0	0.189833	-0.714399	1.22068	-0.585245	0.558383		CRC_vs_HC
hsa-let-7b-5p.iso.t5:G.seed:0.t3:t.ad:0.mm:0	0.990998	-0.648266	0.514659	-1.2596	0.207812	0.410474	CRC_vs_HC
hsa-let-7b-5p.iso.t5:G.seed:0.t3:T.ad:0.mm:0	1.36608	-0.419122	0.435021	-0.963451	0.335321	0.552578	CRC_vs_HC
hsa-let-7b-5p.iso.t5:G.seed:0.t3:t.ad:A.mm:0	0.0519962	-1.07582	3.73692	-0.28789	0.773431		CRC_vs_HC
hsa-let-7b-5p.iso.t5:G.seed:0.t3:T.ad:T.mm:0	0.126513	-0.944174	1.76318	-0.535495	0.592307		CRC_vs_HC
hsa-let-7b-5p.iso.t5:GGG.seed:0.t3:0.ad:0.mm:0	0.0927699	-0.392552	1.8111	-0.216748	0.828405		CRC_vs_HC
hsa-let-7b-5p.iso.t5:t.seed:0.t3:0.ad:0.mm:0	0.329205	-0.185471	0.634347	-0.292381	0.769996		CRC_vs_HC
hsa-let-7b-5p.iso.t5:t.seed:0.t3:t.ad:A.mm:0	0.104824	-0.581856	3.81645	-0.15246	0.878824		CRC_vs_HC
hsa-let-7b-5p.iso.t5:tga.seed:0.t3:0.ad:0.mm:0	0.575062	-1.91963	0.891228	-2.15392	0.0312467	0.109969	CRC_vs_HC
hsa-let-7b-5p.iso.t5:tga.seed:0.t3:0.ad:A.mm:0	0.306592	-0.824459	3.60463	-0.228723	0.819085		CRC_vs_HC
hsa-let-7b-5p.ref.t5:0.seed:0.t3:0.ad:0.mm:0	5164.53	-0.308733	0.127615	-2.41925	0.0155523	0.0658401	CRC_vs_HC
hsa-let-7c-3p.iso.t5:0.seed:0.t3:c.ad:0.mm:0	0.0530148	-0.57829	3.71983	-0.155462	0.876457		CRC_vs_HC
hsa-let-7c-3p.iso.t5:0.seed:0.t3:T.ad:0.mm:0	0.0583911	-0.328976	3.67223	-0.0895847	0.928617		CRC_vs_HC
hsa-let-7c-3p.iso.t5:AA.seed:0.t3:cc.ad:0.mm:0	0.0370745	-0.618675	3.81639	-0.16211	0.871219		CRC_vs_HC
hsa-let-7c-3p.iso.t5:c.seed:0.t3:T.ad:0.mm:0	0.058308	-0.0130547	3.09549	-0.00421732	0.996635		CRC_vs_HC
hsa-let-7c-3p.ref.t5:0.seed:0.t3:0.ad:0.mm:0	0.511912	2.6867	1.05346	2.55035	0.0107614	0.0500458	CRC_vs_HC
hsa-let-7c-5p.iso.t5:0.seed:0.t3:0.ad:A.mm:0	32.8672	1.02736	0.367448	2.79593	0.00517501	0.0286095	CRC_vs_HC
hsa-let-7c-5p.iso.t5:0.seed:0.t3:0.ad:AA.mm:0	1.66356	1.02785	0.54424	1.88859	0.0589462	0.174164	CRC_vs_HC
hsa-let-7c-5p.iso.t5:0.seed:0.t3:0.ad:AAG.mm:0	0.0567376	-0.366214	3.81634	-0.0959595	0.923553		CRC_vs_HC
hsa-let-7c-5p.iso.t5:0.seed:0.t3:0.ad:AAT.mm:0	0.111228	-0.624871	2.88426	-0.216648	0.828482		CRC_vs_HC
hsa-let-7c-5p.iso.t5:0.seed:0.t3:0.ad:AG.mm:0	0.291746	0.0846294	1.19648	0.0707319	0.943611		CRC_vs_HC
hsa-let-7c-5p.iso.t5:0.seed:0.t3:0.ad:AT.mm:0	2.51461	1.00644	0.476037	2.11421	0.0344969	0.117988	CRC_vs_HC
hsa-let-7c-5p.iso.t5:0.seed:0.t3:0.ad:C.mm:0	0.123533	-0.197607	1.61411	-0.122425	0.902563		CRC_vs_HC
hsa-let-7c-5p.iso.t5:0.seed:0.t3:0.ad:G.mm:0	4.58674	0.96426	0.455974	2.11473	0.0344531	0.117963	CRC_vs_HC
hsa-let-7c-5p.iso.t5:0.seed:0.t3:0.ad:GA.mm:0	0.278143	-0.170602	1.23899	-0.137695	0.890482		CRC_vs_HC
hsa-let-7c-5p.iso.t5:0.seed:0.t3:0.ad:GT.mm:0	0.24977	0.753783	1.067	0.706451	0.479908		CRC_vs_HC
hsa-let-7c-5p.iso.t5:0.seed:0.t3:gtt.ad:0.mm:0	2.69081	0.141414	0.506675	0.279103	0.780166	0.890499	CRC_vs_HC
hsa-let-7c-5p.iso.t5:0.seed:0.t3:gtt.ad:A.mm:0	1.18995	-0.130711	0.61379	-0.212958	0.83136	0.911179	CRC_vs_HC
hsa-let-7c-5p.iso.t5:0.seed:0.t3:gtt.ad:AA.mm:0	0.287046	-0.697602	0.792063	-0.880741	0.378458		CRC_vs_HC
hsa-let-7c-5p.iso.t5:0.seed:0.t3:gtt.ad:AAA.mm:0	0.259822	-0.834125	0.936815	-0.890385	0.373259		CRC_vs_HC
hsa-let-7c-5p.iso.t5:0.seed:0.t3:gtt.ad:AAT.mm:0	0.0485786	-0.758964	3.75733	-0.201995	0.83992		CRC_vs_HC
hsa-let-7c-5p.iso.t5:0.seed:0.t3:gtt.ad:AGT.mm:0	0.0298831	-1.16466	3.81635	-0.305176	0.760232		CRC_vs_HC
hsa-let-7c-5p.iso.t5:0.seed:0.t3:gtt.ad:ATT.mm:0	0.152808	-0.799155	2.42975	-0.328904	0.742228		CRC_vs_HC
hsa-let-7c-5p.iso.t5:0.seed:0.t3:gtt.ad:CAA.mm:0	0.0129265	-0.979385	3.81643	-0.256623	0.797469		CRC_vs_HC
hsa-let-7c-5p.iso.t5:0.seed:0.t3:gtt.ad:CTT.mm:0	0.223033	-0.771646	1.07821	-0.715671	0.474194		CRC_vs_HC
hsa-let-7c-5p.iso.t5:0.seed:0.t3:gtt.ad:T.mm:0	0.548897	0.229448	0.701187	0.327227	0.743496	0.869507	CRC_vs_HC
hsa-let-7c-5p.iso.t5:0.seed:0.t3:gtt.ad:TC.mm:0	0.0265901	0	3.81645	0	1		CRC_vs_HC
hsa-let-7c-5p.iso.t5:0.seed:0.t3:gtt.ad:TT.mm:0	0.132559	-1.32663	1.2388	-1.07091	0.284212		CRC_vs_HC
hsa-let-7c-5p.iso.t5:0.seed:0.t3:gtt.ad:TTT.mm:0	0.153304	-0.381612	1.5068	-0.25326	0.800068		CRC_vs_HC
hsa-let-7c-5p.iso.t5:0.seed:0.t3:t.ad:0.mm:0	85.7822	1.35088	0.368551	3.66539	0.000246963	0.00240684	CRC_vs_HC
hsa-let-7c-5p.iso.t5:0.seed:0.t3:T.ad:0.mm:0	38.1435	1.1285	0.338237	3.33642	0.000848634	0.00665122	CRC_vs_HC
hsa-let-7c-5p.iso.t5:0.seed:0.t3:t.ad:A.mm:0	10.235	1.28142	0.475079	2.69728	0.00699087	0.0359113	CRC_vs_HC
hsa-let-7c-5p.iso.t5:0.seed:0.t3:t.ad:AA.mm:0	4.1076	0.773546	0.493875	1.56628	0.117283	0.282693	CRC_vs_HC
hsa-let-7c-5p.iso.t5:0.seed:0.t3:t.ad:AAA.mm:0	0.128366	-0.850331	1.96268	-0.43325	0.664833		CRC_vs_HC
hsa-let-7c-5p.iso.t5:0.seed:0.t3:t.ad:AAG.mm:0	0.0252342	-0.855378	3.81638	-0.224133	0.822654		CRC_vs_HC
hsa-let-7c-5p.iso.t5:0.seed:0.t3:t.ad:AAT.mm:0	0.0693831	0.0519496	3.04418	0.0170652	0.986385		CRC_vs_HC
hsa-let-7c-5p.iso.t5:0.seed:0.t3:t.ad:AG.mm:0	0.409779	0.233035	0.944526	0.246721	0.805124	0.903973	CRC_vs_HC
hsa-let-7c-5p.iso.t5:0.seed:0.t3:t.ad:AGA.mm:0	0.0254329	-0.608948	3.81642	-0.15956	0.873228		CRC_vs_HC
hsa-let-7c-5p.iso.t5:0.seed:0.t3:t.ad:AT.mm:0	1.79541	0.367617	0.578381	0.635597	0.525039	0.722974	CRC_vs_HC
hsa-let-7c-5p.iso.t5:0.seed:0.t3:t.ad:ATA.mm:0	0.012381	-0.674921	3.81647	-0.176844	0.859631		CRC_vs_HC
hsa-let-7c-5p.iso.t5:0.seed:0.t3:t.ad:C.mm:0	0.175676	-0.086837	2.13625	-0.0406493	0.967575		CRC_vs_HC
hsa-let-7c-5p.iso.t5:0.seed:0.t3:t.ad:CA.mm:0	0.064552	-0.73207	3.64719	-0.200722	0.840916		CRC_vs_HC
hsa-let-7c-5p.iso.t5:0.seed:0.t3:t.ad:G.mm:0	0.717242	0.690388	0.693005	0.996224	0.319141	0.538529	CRC_vs_HC
hsa-let-7c-5p.iso.t5:0.seed:0.t3:T.ad:G.mm:0	0.0783162	-0.694414	3.00447	-0.231127	0.817216		CRC_vs_HC
hsa-let-7c-5p.iso.t5:0.seed:0.t3:t.ad:GA.mm:0	0.142765	-0.312298	1.36377	-0.228997	0.818872		CRC_vs_HC
hsa-let-7c-5p.iso.t5:0.seed:0.t3:t.ad:GT.mm:0	0.0778469	-0.583498	2.59515	-0.224842	0.822102		CRC_vs_HC
hsa-let-7c-5p.iso.t5:0.seed:0.t3:T.ad:T.mm:0	0.920932	0.667974	0.526831	1.26791	0.20483	0.406923	CRC_vs_HC
hsa-let-7c-5p.iso.t5:0.seed:0.t3:T.ad:TTT.mm:0	0.0142053	0	3.81646	0	1		CRC_vs_HC
hsa-let-7c-5p.iso.t5:0.seed:0.t3:TA.ad:0.mm:0	0.407333	0.496231	0.75193	0.659943	0.509291	0.709902	CRC_vs_HC
hsa-let-7c-5p.iso.t5:0.seed:0.t3:TAG.ad:0.mm:0	0.973208	-0.782419	0.606055	-1.291	0.196703	0.396339	CRC_vs_HC
hsa-let-7c-5p.iso.t5:0.seed:0.t3:TAG.ad:0.mm:17GA	0.205704	-0.20838	2.80448	-0.0743026	0.94077		CRC_vs_HC
hsa-let-7c-5p.iso.t5:0.seed:0.t3:tt.ad:AAA.mm:0	0.266729	-0.176323	1.11062	-0.158761	0.873857		CRC_vs_HC
hsa-let-7c-5p.iso.t5:0.seed:0.t3:tt.ad:AAG.mm:0	0.0158208	-0.4625	3.81644	-0.121186	0.903544		CRC_vs_HC
hsa-let-7c-5p.iso.t5:0.seed:0.t3:tt.ad:AT.mm:0	0.142955	0.456293	1.46825	0.310773	0.755973		CRC_vs_HC
hsa-let-7c-5p.iso.t5:0.seed:0.t3:tt.ad:CT.mm:0	0.882171	-0.732844	0.742202	-0.987392	0.323451	0.542582	CRC_vs_HC
hsa-let-7c-5p.iso.t5:0.seed:0.t3:tt.ad:CTA.mm:0	0.0335582	-1.03782	3.81631	-0.271943	0.785666		CRC_vs_HC
hsa-let-7c-5p.iso.t5:0.seed:0.t3:tt.ad:CTT.mm:0	0.0662887	-0.78868	3.62475	-0.217582	0.827755		CRC_vs_HC
hsa-let-7c-5p.iso.t5:0.seed:0.t3:tt.ad:G.mm:0	0.0932235	-0.543033	2.57798	-0.210643	0.833166		CRC_vs_HC
hsa-let-7c-5p.iso.t5:0.seed:0.t3:tt.ad:GT.mm:0	0.174196	0.0701209	1.6454	0.0426163	0.966007		CRC_vs_HC
hsa-let-7c-5p.iso.t5:GT.seed:0.t3:t.ad:0.mm:0	0.0581225	0.0679721	3.81518	0.0178162	0.985785		CRC_vs_HC
hsa-let-7c-5p.iso.t5:t.seed:0.t3:0.ad:0.mm:0	0.204953	-0.0643144	1.87953	-0.0342183	0.972703		CRC_vs_HC
hsa-let-7c-5p.iso.t5:T.seed:0.t3:0.ad:0.mm:0	3.70968	1.88003	0.467148	4.02449	5.70983e-05	0.000726022	CRC_vs_HC
hsa-let-7c-5p.iso.t5:T.seed:0.t3:0.ad:A.mm:0	0.0849718	-0.937158	3.8161	-0.24558	0.806007		CRC_vs_HC
hsa-let-7c-5p.iso.t5:T.seed:0.t3:t.ad:0.mm:0	2.51115	1.46762	0.55445	2.64699	0.00812123	0.0403004	CRC_vs_HC
hsa-let-7c-5p.iso.t5:T.seed:0.t3:T.ad:0.mm:0	0.165025	-0.20938	1.35695	-0.154302	0.877372		CRC_vs_HC
hsa-let-7c-5p.iso.t5:T.seed:0.t3:t.ad:A.mm:0	0.284724	0.0042467	1.40556	0.00302135	0.997589		CRC_vs_HC
hsa-let-7c-5p.ref.t5:0.seed:0.t3:0.ad:0.mm:0	547.112	1.40151	0.367256	3.81616	0.000135542	0.00146494	CRC_vs_HC
hsa-let-7d-3p.iso.t5:0.seed:0.t3:0.ad:A.mm:0	0.817371	-0.817479	0.60566	-1.34973	0.177102	0.372686	CRC_vs_HC
hsa-let-7d-3p.iso.t5:0.seed:0.t3:ct.ad:0.mm:0	20.2508	-0.0866689	0.171896	-0.504194	0.614125	0.785127	CRC_vs_HC
hsa-let-7d-3p.iso.t5:0.seed:0.t3:ct.ad:A.mm:0	0.390534	-0.392346	0.740445	-0.529879	0.596196		CRC_vs_HC
hsa-let-7d-3p.iso.t5:0.seed:0.t3:ct.ad:AA.mm:0	0.101391	-0.719725	1.98367	-0.362825	0.716735		CRC_vs_HC
hsa-let-7d-3p.iso.t5:0.seed:0.t3:ct.ad:AT.mm:0	0.219483	-0.704097	1.22871	-0.573036	0.56662		CRC_vs_HC
hsa-let-7d-3p.iso.t5:0.seed:0.t3:ct.ad:T.mm:0	0.937288	-0.350615	0.535534	-0.654702	0.51266	0.712854	CRC_vs_HC
hsa-let-7d-3p.iso.t5:0.seed:0.t3:ct.ad:TT.mm:0	0.207222	-1.14304	1.1135	-1.02652	0.304645		CRC_vs_HC
hsa-let-7d-3p.iso.t5:0.seed:0.t3:t.ad:0.mm:0	38.789	0.11245	0.125302	0.897434	0.369487	0.585202	CRC_vs_HC
hsa-let-7d-3p.iso.t5:0.seed:0.t3:T.ad:0.mm:0	0.463488	0.0862566	0.672115	0.128336	0.897883	0.949525	CRC_vs_HC
hsa-let-7d-3p.iso.t5:0.seed:0.t3:t.ad:A.mm:0	8.45618	-0.441384	0.233872	-1.88728	0.0591221	0.174493	CRC_vs_HC
hsa-let-7d-3p.iso.t5:0.seed:0.t3:t.ad:AA.mm:0	0.258029	-1.02083	1.01983	-1.00098	0.316837		CRC_vs_HC
hsa-let-7d-3p.iso.t5:0.seed:0.t3:t.ad:AAG.mm:0	0.0288059	-0.770919	3.81628	-0.202008	0.83991		CRC_vs_HC
hsa-let-7d-3p.iso.t5:0.seed:0.t3:t.ad:AT.mm:0	0.0907162	-0.419069	1.62877	-0.257291	0.796954		CRC_vs_HC
hsa-let-7d-3p.iso.t5:0.seed:0.t3:t.ad:C.mm:0	4.18998	-0.44104	0.317406	-1.38951	0.164677	0.354588	CRC_vs_HC
hsa-let-7d-3p.iso.t5:0.seed:0.t3:t.ad:CA.mm:0	0.301059	-0.688859	0.752297	-0.915674	0.359838		CRC_vs_HC
hsa-let-7d-3p.iso.t5:0.seed:0.t3:t.ad:CAT.mm:0	0.0268649	-0.738315	3.81644	-0.193457	0.846601		CRC_vs_HC
hsa-let-7d-3p.iso.t5:0.seed:0.t3:t.ad:G.mm:0	0.616888	0.105878	0.627151	0.168824	0.865935	0.932335	CRC_vs_HC
hsa-let-7d-3p.iso.t5:0.seed:0.t3:TA.ad:0.mm:0	0.0421603	-0.83906	3.81638	-0.219858	0.825982		CRC_vs_HC
hsa-let-7d-3p.iso.t5:0.seed:0.t3:tct.ad:0.mm:0	1.74588	0.283358	0.397534	0.712788	0.475977	0.682638	CRC_vs_HC
hsa-let-7d-3p.iso.t5:0.seed:0.t3:tct.ad:A.mm:0	0.194823	-0.479309	1.04473	-0.458787	0.646387		CRC_vs_HC
hsa-let-7d-3p.iso.t5:0.seed:0.t3:tct.ad:ACT.mm:0	0.0400625	-0.981054	3.81618	-0.257077	0.797119		CRC_vs_HC
hsa-let-7d-3p.iso.t5:0.seed:0.t3:tct.ad:AG.mm:0	0.012381	-0.674921	3.81647	-0.176844	0.859631		CRC_vs_HC
hsa-let-7d-3p.iso.t5:0.seed:0.t3:tct.ad:CCT.mm:0	0.0227202	-0.905858	3.8163	-0.237366	0.812373		CRC_vs_HC
hsa-let-7d-3p.iso.t5:0.seed:0.t3:tct.ad:GCT.mm:0	0.0821371	-0.0608323	2.27197	-0.0267752	0.978639		CRC_vs_HC
hsa-let-7d-3p.iso.t5:c.seed:0.t3:0.ad:0.mm:0	18.5866	0.0569713	0.207883	0.274055	0.784043	0.892552	CRC_vs_HC
hsa-let-7d-3p.iso.t5:c.seed:0.t3:ct.ad:0.mm:0	1.83466	-0.344103	0.400561	-0.859052	0.390312	0.605587	CRC_vs_HC
hsa-let-7d-3p.iso.t5:c.seed:0.t3:t.ad:0.mm:0	3.4995	-0.226447	0.275427	-0.822166	0.410983	0.623398	CRC_vs_HC
hsa-let-7d-3p.iso.t5:c.seed:0.t3:t.ad:A.mm:0	1.13774	-0.555138	0.465654	-1.19217	0.233195	0.44047	CRC_vs_HC
hsa-let-7d-3p.iso.t5:c.seed:0.t3:t.ad:C.mm:0	0.281508	-1.78845	0.992604	-1.80177	0.0715808		CRC_vs_HC
hsa-let-7d-3p.iso.t5:c.seed:0.t3:t.ad:CT.mm:0	0.0479116	-1.01252	3.81636	-0.265311	0.79077		CRC_vs_HC
hsa-let-7d-3p.iso.t5:c.seed:0.t3:T.ad:T.mm:0	0.059689	-0.154841	3.08906	-0.0501255	0.960022		CRC_vs_HC
hsa-let-7d-3p.iso.t5:TAA.seed:0.t3:t.ad:0.mm:0	0.030476	-1.02765	3.81623	-0.269284	0.787711		CRC_vs_HC
hsa-let-7d-3p.ref.t5:0.seed:0.t3:0.ad:0.mm:0	170.968	-0.0740785	0.170865	-0.43355	0.664616	0.821108	CRC_vs_HC
hsa-let-7d-5p.iso.t5:0.seed:0.t3:0.ad:A.mm:0	74.386	-0.00159892	0.165052	-0.00968732	0.992271	0.995852	CRC_vs_HC
hsa-let-7d-5p.iso.t5:0.seed:0.t3:0.ad:AA.mm:0	7.5831	-0.0331925	0.224099	-0.148115	0.882252	0.940651	CRC_vs_HC
hsa-let-7d-5p.iso.t5:0.seed:0.t3:0.ad:AAA.mm:0	0.408311	0.438718	0.722102	0.607557	0.543482	0.735347	CRC_vs_HC
hsa-let-7d-5p.iso.t5:0.seed:0.t3:0.ad:AC.mm:0	0.138786	-0.855532	2.46863	-0.346561	0.728921		CRC_vs_HC
hsa-let-7d-5p.iso.t5:0.seed:0.t3:0.ad:AG.mm:0	0.570444	0.515735	0.695518	0.741512	0.458383	0.667053	CRC_vs_HC
hsa-let-7d-5p.iso.t5:0.seed:0.t3:0.ad:AGA.mm:0	0.0945403	-0.288393	2.53818	-0.113622	0.909537		CRC_vs_HC
hsa-let-7d-5p.iso.t5:0.seed:0.t3:0.ad:AGT.mm:0	0.0443227	-1.17042	3.81598	-0.306717	0.759059		CRC_vs_HC
hsa-let-7d-5p.iso.t5:0.seed:0.t3:0.ad:AT.mm:0	3.32724	-0.38603	0.259841	-1.48564	0.137375	0.314383	CRC_vs_HC
hsa-let-7d-5p.iso.t5:0.seed:0.t3:0.ad:C.mm:0	0.574266	0.0556878	0.579784	0.0960492	0.923482	0.961992	CRC_vs_HC
hsa-let-7d-5p.iso.t5:0.seed:0.t3:0.ad:G.mm:0	5.75531	-0.364546	0.224666	-1.62261	0.104672	0.260909	CRC_vs_HC
hsa-let-7d-5p.iso.t5:0.seed:0.t3:0.ad:GA.mm:0	0.431052	-1.49723	0.758441	-1.97408	0.0483723	0.151672	CRC_vs_HC
hsa-let-7d-5p.iso.t5:0.seed:0.t3:0.ad:GT.mm:0	0.438671	-1.33509	0.657222	-2.03142	0.0422124	0.137089	CRC_vs_HC
hsa-let-7d-5p.iso.t5:0.seed:0.t3:0.ad:GTT.mm:0	0.0173148	-0.575405	3.81645	-0.15077	0.880157		CRC_vs_HC
hsa-let-7d-5p.iso.t5:0.seed:0.t3:gtt.ad:0.mm:0	5.47378	-0.344363	0.295752	-1.16436	0.244276	0.453944	CRC_vs_HC
hsa-let-7d-5p.iso.t5:0.seed:0.t3:gtt.ad:A.mm:0	0.84971	0.071023	0.542874	0.130828	0.895911	0.948612	CRC_vs_HC
hsa-let-7d-5p.iso.t5:0.seed:0.t3:gtt.ad:AA.mm:0	0.451898	-0.340492	0.696306	-0.488998	0.624843	0.792755	CRC_vs_HC
hsa-let-7d-5p.iso.t5:0.seed:0.t3:gtt.ad:AAA.mm:0	0.0830662	-0.126094	2.99203	-0.0421434	0.966384		CRC_vs_HC
hsa-let-7d-5p.iso.t5:0.seed:0.t3:gtt.ad:AT.mm:0	0.242352	-1.05031	1.11223	-0.944332	0.345		CRC_vs_HC
hsa-let-7d-5p.iso.t5:0.seed:0.t3:gtt.ad:ATT.mm:0	0.387465	-0.568053	0.772933	-0.734932	0.462381		CRC_vs_HC
hsa-let-7d-5p.iso.t5:0.seed:0.t3:gtt.ad:CTT.mm:0	0.535519	-1.24342	0.694445	-1.79053	0.0733693	0.203693	CRC_vs_HC
hsa-let-7d-5p.iso.t5:0.seed:0.t3:gtt.ad:T.mm:0	0.112026	-0.831989	2.23101	-0.37292	0.709208		CRC_vs_HC
hsa-let-7d-5p.iso.t5:0.seed:0.t3:gtt.ad:TTT.mm:0	0.18879	-0.0941338	1.03454	-0.0909909	0.9275		CRC_vs_HC
hsa-let-7d-5p.iso.t5:0.seed:0.t3:t.ad:0.mm:0	326.866	-0.150476	0.129544	-1.16158	0.245408	0.454951	CRC_vs_HC
hsa-let-7d-5p.iso.t5:0.seed:0.t3:T.ad:0.mm:0	116.078	-0.148786	0.172851	-0.860774	0.389363	0.605066	CRC_vs_HC
hsa-let-7d-5p.iso.t5:0.seed:0.t3:t.ad:A.mm:0	15.7906	-0.126233	0.194068	-0.65046	0.515395	0.714952	CRC_vs_HC
hsa-let-7d-5p.iso.t5:0.seed:0.t3:T.ad:A.mm:0	1.33263	0.0674206	0.46469	0.145087	0.884642	0.941938	CRC_vs_HC
hsa-let-7d-5p.iso.t5:0.seed:0.t3:t.ad:AA.mm:0	5.01344	-0.269287	0.278	-0.968657	0.332716	0.550099	CRC_vs_HC
hsa-let-7d-5p.iso.t5:0.seed:0.t3:t.ad:AAA.mm:0	0.223672	-0.643183	1.0018	-0.642025	0.520857		CRC_vs_HC
hsa-let-7d-5p.iso.t5:0.seed:0.t3:t.ad:AAG.mm:0	0.033623	-1.17134	3.81634	-0.306928	0.758899		CRC_vs_HC
hsa-let-7d-5p.iso.t5:0.seed:0.t3:t.ad:AG.mm:0	0.352716	-0.570897	0.820676	-0.695643	0.486652		CRC_vs_HC
hsa-let-7d-5p.iso.t5:0.seed:0.t3:t.ad:AGA.mm:0	0.122526	-0.571314	1.45471	-0.392733	0.694517		CRC_vs_HC
hsa-let-7d-5p.iso.t5:0.seed:0.t3:t.ad:AT.mm:0	1.98964	0.00541108	0.387211	0.0139745	0.98885	0.994648	CRC_vs_HC
hsa-let-7d-5p.iso.t5:0.seed:0.t3:T.ad:AT.mm:0	0.0708548	-0.670047	3.81635	-0.175573	0.86063		CRC_vs_HC
hsa-let-7d-5p.iso.t5:0.seed:0.t3:t.ad:C.mm:0	0.234989	-0.364378	1.41982	-0.256636	0.797459		CRC_vs_HC
hsa-let-7d-5p.iso.t5:0.seed:0.t3:t.ad:G.mm:0	1.35619	0.276827	0.394247	0.702165	0.482576	0.689176	CRC_vs_HC
hsa-let-7d-5p.iso.t5:0.seed:0.t3:T.ad:G.mm:0	0.133674	-0.723648	1.61762	-0.447354	0.65462		CRC_vs_HC
hsa-let-7d-5p.iso.t5:0.seed:0.t3:t.ad:GA.mm:0	0.242922	-0.847071	1.0533	-0.804204	0.421279		CRC_vs_HC
hsa-let-7d-5p.iso.t5:0.seed:0.t3:t.ad:GT.mm:0	0.107739	0.110017	1.77445	0.0620009	0.950562		CRC_vs_HC
hsa-let-7d-5p.iso.t5:0.seed:0.t3:tt.ad:0.mm:0	50.6961	-0.559554	0.161516	-3.46439	0.000531442	0.00446296	CRC_vs_HC
hsa-let-7d-5p.iso.t5:0.seed:0.t3:TT.ad:0.mm:0	3.30436	0.268957	0.286927	0.937372	0.348567	0.564392	CRC_vs_HC
hsa-let-7d-5p.iso.t5:0.seed:0.t3:tt.ad:A.mm:0	10.301	-0.44512	0.222956	-1.99644	0.0458858	0.146164	CRC_vs_HC
hsa-let-7d-5p.iso.t5:0.seed:0.t3:tt.ad:AA.mm:0	2.04322	-0.948365	0.332733	-2.85023	0.00436879	0.0249698	CRC_vs_HC
hsa-let-7d-5p.iso.t5:0.seed:0.t3:tt.ad:AAA.mm:0	0.473121	-0.688308	0.624935	-1.10141	0.27072	0.485857	CRC_vs_HC
hsa-let-7d-5p.iso.t5:0.seed:0.t3:tt.ad:AAC.mm:0	0.0712866	0	3.81637	0	1		CRC_vs_HC
hsa-let-7d-5p.iso.t5:0.seed:0.t3:tt.ad:AAG.mm:0	0.0536409	-0.439701	3.11314	-0.14124	0.88768		CRC_vs_HC
hsa-let-7d-5p.iso.t5:0.seed:0.t3:tt.ad:AAT.mm:0	0.142311	-0.683667	1.44372	-0.473544	0.635825		CRC_vs_HC
hsa-let-7d-5p.iso.t5:0.seed:0.t3:tt.ad:AGA.mm:0	0.164591	-0.990978	1.77506	-0.558278	0.576655		CRC_vs_HC
hsa-let-7d-5p.iso.t5:0.seed:0.t3:tt.ad:AT.mm:0	0.546388	0.916673	0.581828	1.57551	0.11514	0.279146	CRC_vs_HC
hsa-let-7d-5p.iso.t5:0.seed:0.t3:tt.ad:ATT.mm:0	0.144038	-0.810014	2.46214	-0.328988	0.742164		CRC_vs_HC
hsa-let-7d-5p.iso.t5:0.seed:0.t3:tt.ad:C.mm:0	0.05339	-0.350046	3.11356	-0.112426	0.910485		CRC_vs_HC
hsa-let-7d-5p.iso.t5:0.seed:0.t3:tt.ad:CT.mm:0	0.423087	-0.230271	0.739281	-0.311479	0.755436	0.876329	CRC_vs_HC
hsa-let-7d-5p.iso.t5:0.seed:0.t3:tt.ad:G.mm:0	0.347838	-0.928297	0.895966	-1.03609	0.300162		CRC_vs_HC
hsa-let-7d-5p.iso.t5:0.seed:0.t3:tt.ad:GT.mm:0	0.250812	-1.28199	0.948137	-1.35211	0.17634		CRC_vs_HC
hsa-let-7d-5p.iso.t5:0.seed:0.t3:TT.ad:T.mm:0	0.207194	-1.14353	1.02167	-1.11928	0.26302		CRC_vs_HC
hsa-let-7d-5p.iso.t5:a.seed:0.t3:0.ad:0.mm:0	0.388781	-0.0451932	0.913583	-0.0494681	0.960546		CRC_vs_HC
hsa-let-7d-5p.iso.t5:A.seed:0.t3:0.ad:0.mm:0	1.35703	0.182036	0.411558	0.44231	0.658265	0.816354	CRC_vs_HC
hsa-let-7d-5p.iso.t5:A.seed:0.t3:t.ad:0.mm:0	1.02266	-0.179003	0.504539	-0.354785	0.722751	0.857688	CRC_vs_HC
hsa-let-7d-5p.iso.t5:A.seed:0.t3:tt.ad:0.mm:0	0.0859065	-1.15812	2.26024	-0.512386	0.608381		CRC_vs_HC
hsa-let-7d-5p.iso.t5:aga.seed:0.t3:0.ad:0.mm:0	1.76455	-0.157878	0.500877	-0.315203	0.752608	0.874549	CRC_vs_HC
hsa-let-7d-5p.iso.t5:aga.seed:0.t3:t.ad:0.mm:0	0.400403	-0.126168	0.83465	-0.151163	0.879847		CRC_vs_HC
hsa-let-7d-5p.ref.t5:0.seed:0.t3:0.ad:0.mm:0	1661.17	0.0161739	0.137522	0.11761	0.906377	0.954043	CRC_vs_HC
hsa-let-7e-3p.iso.t5:0.seed:0.t3:0.ad:A.mm:0	0.200781	0.147341	1.24322	0.118516	0.905659		CRC_vs_HC
hsa-let-7e-3p.iso.t5:0.seed:0.t3:0.ad:T.mm:0	1.71523	0.375896	0.459048	0.818859	0.412867	0.625142	CRC_vs_HC
hsa-let-7e-3p.iso.t5:0.seed:0.t3:c.ad:0.mm:0	1.57332	-0.251505	0.344209	-0.730675	0.464978	0.672348	CRC_vs_HC
hsa-let-7e-3p.iso.t5:0.seed:0.t3:c.ad:T.mm:0	1.35831	0.881775	0.401957	2.1937	0.0282566	0.102277	CRC_vs_HC
hsa-let-7e-3p.iso.t5:0.seed:0.t3:cc.ad:0.mm:0	0.329147	0.300705	0.674615	0.445743	0.655783		CRC_vs_HC
hsa-let-7e-3p.iso.t5:0.seed:0.t3:cc.ad:A.mm:0	0.0916828	-0.826732	2.00032	-0.413299	0.679388		CRC_vs_HC
hsa-let-7e-3p.iso.t5:0.seed:0.t3:tcc.ad:0.mm:0	0.0861036	-1.01437	2.01027	-0.504593	0.613845		CRC_vs_HC
hsa-let-7e-3p.iso.t5:c.seed:0.t3:0.ad:0.mm:0	0.197056	-0.535508	1.09275	-0.490056	0.624094		CRC_vs_HC
hsa-let-7e-3p.iso.t5:c.seed:0.t3:0.ad:A.mm:0	0.012381	-0.674921	3.81647	-0.176844	0.859631		CRC_vs_HC
hsa-let-7e-3p.iso.t5:c.seed:0.t3:0.ad:T.mm:0	1.29706	0.654216	0.482077	1.35708	0.174757	0.369405	CRC_vs_HC
hsa-let-7e-3p.iso.t5:c.seed:0.t3:c.ad:0.mm:0	0.0364406	-1.02037	3.81626	-0.267376	0.78918		CRC_vs_HC
hsa-let-7e-3p.ref.t5:0.seed:0.t3:0.ad:0.mm:0	4.54791	0.313271	0.307685	1.01815	0.308605	0.528925	CRC_vs_HC
hsa-let-7e-5p.iso.t5:0.seed:0.t3:0.ad:A.mm:0	95.8916	0.00910911	0.195386	0.046621	0.962815	0.981431	CRC_vs_HC
hsa-let-7e-5p.iso.t5:0.seed:0.t3:0.ad:AA.mm:0	10.7968	-0.0151294	0.23518	-0.064331	0.948707	0.974155	CRC_vs_HC
hsa-let-7e-5p.iso.t5:0.seed:0.t3:0.ad:AAA.mm:0	0.841514	0.663132	0.542891	1.22148	0.221903	0.426901	CRC_vs_HC
hsa-let-7e-5p.iso.t5:0.seed:0.t3:0.ad:AAT.mm:0	0.246185	-0.60728	1.29485	-0.468998	0.639071		CRC_vs_HC
hsa-let-7e-5p.iso.t5:0.seed:0.t3:0.ad:AG.mm:0	0.766509	-0.194273	0.515183	-0.377096	0.706103	0.847943	CRC_vs_HC
hsa-let-7e-5p.iso.t5:0.seed:0.t3:0.ad:AGA.mm:0	0.13045	-0.63707	1.75701	-0.362588	0.716912		CRC_vs_HC
hsa-let-7e-5p.iso.t5:0.seed:0.t3:0.ad:AGT.mm:0	0.057274	-0.81262	3.11309	-0.261034	0.794067		CRC_vs_HC
hsa-let-7e-5p.iso.t5:0.seed:0.t3:0.ad:AT.mm:0	6.91025	0.108578	0.211546	0.513261	0.607769	0.781048	CRC_vs_HC
hsa-let-7e-5p.iso.t5:0.seed:0.t3:0.ad:ATA.mm:0	0.106525	-0.582964	2.21098	-0.263668	0.792036		CRC_vs_HC
hsa-let-7e-5p.iso.t5:0.seed:0.t3:0.ad:ATT.mm:0	0.280981	-0.202397	0.918919	-0.220256	0.825672		CRC_vs_HC
hsa-let-7e-5p.iso.t5:0.seed:0.t3:0.ad:C.mm:0	0.854126	0.470782	0.620417	0.758815	0.447963	0.657533	CRC_vs_HC
hsa-let-7e-5p.iso.t5:0.seed:0.t3:0.ad:T.mm:0	106.151	0.10055	0.184588	0.544729	0.58594	0.766594	CRC_vs_HC
hsa-let-7e-5p.iso.t5:0.seed:0.t3:0.ad:TA.mm:0	0.193611	-0.784808	1.53852	-0.510105	0.609978		CRC_vs_HC
hsa-let-7e-5p.iso.t5:0.seed:0.t3:0.ad:TC.mm:0	0.091933	-0.261023	1.80601	-0.14453	0.885082		CRC_vs_HC
hsa-let-7e-5p.iso.t5:0.seed:0.t3:0.ad:TT.mm:0	0.203093	-0.519529	1.22313	-0.424752	0.671017		CRC_vs_HC
hsa-let-7e-5p.iso.t5:0.seed:0.t3:0.ad:TTT.mm:0	0.426434	-0.941778	0.915195	-1.02905	0.303458	0.52309	CRC_vs_HC
hsa-let-7e-5p.iso.t5:0.seed:0.t3:G.ad:0.mm:0	30.6015	0.403179	0.201643	1.99947	0.0455579	0.145376	CRC_vs_HC
hsa-let-7e-5p.iso.t5:0.seed:0.t3:G.ad:T.mm:0	3.17833	0.0948459	0.329218	0.288094	0.773274	0.885867	CRC_vs_HC
hsa-let-7e-5p.iso.t5:0.seed:0.t3:G.ad:TA.mm:0	0.11518	-0.997325	2.86435	-0.348185	0.727701		CRC_vs_HC
hsa-let-7e-5p.iso.t5:0.seed:0.t3:GA.ad:0.mm:0	7.10632	-0.223238	0.220963	-1.0103	0.312353	0.532225	CRC_vs_HC
hsa-let-7e-5p.iso.t5:0.seed:0.t3:gtt.ad:0.mm:0	5.87784	-0.471397	0.27421	-1.71911	0.0855943	0.228026	CRC_vs_HC
hsa-let-7e-5p.iso.t5:0.seed:0.t3:gtt.ad:A.mm:0	2.45383	-0.149216	0.389866	-0.382737	0.701915	0.844799	CRC_vs_HC
hsa-let-7e-5p.iso.t5:0.seed:0.t3:gtt.ad:AA.mm:0	2.52788	-0.234965	0.370671	-0.63389	0.526153	0.723493	CRC_vs_HC
hsa-let-7e-5p.iso.t5:0.seed:0.t3:gtt.ad:AAA.mm:0	1.69004	-0.179215	0.435173	-0.411825	0.680467	0.830641	CRC_vs_HC
hsa-let-7e-5p.iso.t5:0.seed:0.t3:gtt.ad:AG.mm:0	0.169896	-1.07786	1.7301	-0.623005	0.533281		CRC_vs_HC
hsa-let-7e-5p.iso.t5:0.seed:0.t3:gtt.ad:AT.mm:0	0.333034	-0.0910692	0.792899	-0.114856	0.908559		CRC_vs_HC
hsa-let-7e-5p.iso.t5:0.seed:0.t3:gtt.ad:ATA.mm:0	0.0399505	-0.48875	3.81643	-0.128064	0.898098		CRC_vs_HC
hsa-let-7e-5p.iso.t5:0.seed:0.t3:gtt.ad:ATT.mm:0	1.26072	-0.140458	1.11764	-0.125674	0.89999	0.950097	CRC_vs_HC
hsa-let-7e-5p.iso.t5:0.seed:0.t3:gtt.ad:C.mm:0	0.0100131	-0.808556	3.81636	-0.211866	0.832212		CRC_vs_HC
hsa-let-7e-5p.iso.t5:0.seed:0.t3:gtt.ad:CTT.mm:0	0.535709	-1.88426	0.648673	-2.9048	0.00367493	0.021645	CRC_vs_HC
hsa-let-7e-5p.iso.t5:0.seed:0.t3:gtt.ad:T.mm:0	0.898697	0.108941	0.542415	0.200844	0.84082	0.916886	CRC_vs_HC
hsa-let-7e-5p.iso.t5:0.seed:0.t3:gtt.ad:TA.mm:0	0.0774383	-1.12445	2.28377	-0.492366	0.62246		CRC_vs_HC
hsa-let-7e-5p.iso.t5:0.seed:0.t3:gtt.ad:TAA.mm:0	0.0727499	-1.15341	3.58198	-0.322003	0.74745		CRC_vs_HC
hsa-let-7e-5p.iso.t5:0.seed:0.t3:gtt.ad:TTT.mm:0	0.612148	-0.0139629	0.805718	-0.0173298	0.986174	0.993342	CRC_vs_HC
hsa-let-7e-5p.iso.t5:0.seed:0.t3:t.ad:0.mm:0	316.953	-0.0593973	0.179704	-0.33053	0.741	0.868437	CRC_vs_HC
hsa-let-7e-5p.iso.t5:0.seed:0.t3:t.ad:A.mm:0	24.6585	-0.128474	0.210459	-0.610445	0.541567	0.734135	CRC_vs_HC
hsa-let-7e-5p.iso.t5:0.seed:0.t3:t.ad:AA.mm:0	10.7825	-0.354981	0.275071	-1.2905	0.196876	0.396383	CRC_vs_HC
hsa-let-7e-5p.iso.t5:0.seed:0.t3:t.ad:AAA.mm:0	1.32371	-0.124481	0.420711	-0.295883	0.76732	0.883194	CRC_vs_HC
hsa-let-7e-5p.iso.t5:0.seed:0.t3:t.ad:AAT.mm:0	0.484625	-0.636695	0.674789	-0.943547	0.345401	0.561965	CRC_vs_HC
hsa-let-7e-5p.iso.t5:0.seed:0.t3:t.ad:AC.mm:0	0.0843586	-0.674983	3.81639	-0.176864	0.859615		CRC_vs_HC
hsa-let-7e-5p.iso.t5:0.seed:0.t3:t.ad:AG.mm:0	0.918948	-0.325078	0.522966	-0.621603	0.534203	0.729274	CRC_vs_HC
hsa-let-7e-5p.iso.t5:0.seed:0.t3:t.ad:AGA.mm:0	0.394116	-0.41998	0.654849	-0.641339	0.521303		CRC_vs_HC
hsa-let-7e-5p.iso.t5:0.seed:0.t3:t.ad:AGT.mm:0	0.145758	-0.68151	1.45658	-0.467884	0.639867		CRC_vs_HC
hsa-let-7e-5p.iso.t5:0.seed:0.t3:t.ad:AT.mm:0	5.3659	-0.0632535	0.285543	-0.22152	0.824688	0.908085	CRC_vs_HC
hsa-let-7e-5p.iso.t5:0.seed:0.t3:t.ad:ATT.mm:0	0.215083	-1.25515	1.04462	-1.20154	0.229542		CRC_vs_HC
hsa-let-7e-5p.iso.t5:0.seed:0.t3:t.ad:C.mm:0	0.127602	-0.161594	1.47257	-0.109736	0.912619		CRC_vs_HC
hsa-let-7e-5p.iso.t5:0.seed:0.t3:t.ad:CT.mm:0	0.0163332	-1.08576	3.81642	-0.284497	0.77603		CRC_vs_HC
hsa-let-7e-5p.iso.t5:0.seed:0.t3:t.ad:G.mm:0	0.875809	0.631958	0.469744	1.34532	0.17852	0.373996	CRC_vs_HC
hsa-let-7e-5p.iso.t5:0.seed:0.t3:t.ad:GA.mm:0	0.416616	-0.293301	0.732973	-0.400152	0.689045	0.836992	CRC_vs_HC
hsa-let-7e-5p.iso.t5:0.seed:0.t3:t.ad:GAA.mm:0	0.0234385	-0.700615	3.81634	-0.183583	0.854341		CRC_vs_HC
hsa-let-7e-5p.iso.t5:0.seed:0.t3:t.ad:GT.mm:0	0.333347	-0.472068	0.84306	-0.559946	0.575516		CRC_vs_HC
hsa-let-7e-5p.iso.t5:0.seed:0.t3:tt.ad:0.mm:0	33.1205	-0.295643	0.18013	-1.64127	0.100741	0.253861	CRC_vs_HC
hsa-let-7e-5p.iso.t5:0.seed:0.t3:tt.ad:A.mm:0	12.6006	-0.303898	0.254466	-1.19426	0.232376	0.439739	CRC_vs_HC
hsa-let-7e-5p.iso.t5:0.seed:0.t3:tt.ad:AA.mm:0	3.77867	0.168464	0.307396	0.548035	0.583668	0.764281	CRC_vs_HC
hsa-let-7e-5p.iso.t5:0.seed:0.t3:tt.ad:AAA.mm:0	2.65302	0.108706	0.311099	0.349426	0.726769	0.860719	CRC_vs_HC
hsa-let-7e-5p.iso.t5:0.seed:0.t3:tt.ad:AAT.mm:0	0.498879	-0.157406	0.671357	-0.234459	0.814629	0.903973	CRC_vs_HC
hsa-let-7e-5p.iso.t5:0.seed:0.t3:tt.ad:AG.mm:0	0.0612861	-0.953597	2.64756	-0.360179	0.718713		CRC_vs_HC
hsa-let-7e-5p.iso.t5:0.seed:0.t3:tt.ad:AGA.mm:0	0.299694	-0.468151	0.855894	-0.546973	0.584397		CRC_vs_HC
hsa-let-7e-5p.iso.t5:0.seed:0.t3:tt.ad:AT.mm:0	0.674892	-0.428608	0.526823	-0.813571	0.415891	0.627348	CRC_vs_HC
hsa-let-7e-5p.iso.t5:0.seed:0.t3:tt.ad:CA.mm:0	0.0917611	-1.15348	2.5542	-0.451601	0.651556		CRC_vs_HC
hsa-let-7e-5p.iso.t5:0.seed:0.t3:tt.ad:CT.mm:0	1.64283	-1.25988	0.611628	-2.05988	0.0394099	0.130258	CRC_vs_HC
hsa-let-7e-5p.iso.t5:0.seed:0.t3:tt.ad:CTA.mm:0	0.0584046	-1.18719	3.09198	-0.383959	0.701009		CRC_vs_HC
hsa-let-7e-5p.iso.t5:0.seed:0.t3:tt.ad:CTT.mm:0	0.11047	-0.965061	2.00468	-0.481403	0.63023		CRC_vs_HC
hsa-let-7e-5p.iso.t5:0.seed:0.t3:tt.ad:GA.mm:0	0.0426675	-0.726064	3.81643	-0.190247	0.849116		CRC_vs_HC
hsa-let-7e-5p.iso.t5:0.seed:0.t3:tt.ad:GT.mm:0	0.151367	-0.879567	1.33745	-0.657647	0.510765		CRC_vs_HC
hsa-let-7e-5p.iso.t5:C.seed:0.t3:0.ad:0.mm:0	0.569393	0.327548	0.507311	0.645655	0.518503	0.717263	CRC_vs_HC
hsa-let-7e-5p.iso.t5:C.seed:0.t3:G.ad:0.mm:0	0.193093	-0.753474	1.43925	-0.523519	0.600613		CRC_vs_HC
hsa-let-7e-5p.iso.t5:C.seed:0.t3:t.ad:0.mm:0	0.114295	-0.777668	1.79433	-0.433402	0.664722		CRC_vs_HC
hsa-let-7e-5p.iso.t5:t.seed:0.t3:G.ad:0.mm:0	0.035757	-0.153191	3.81612	-0.0401432	0.967979		CRC_vs_HC
hsa-let-7e-5p.ref.t5:0.seed:0.t3:0.ad:0.mm:0	1091.57	0.179645	0.155837	1.15277	0.249003	0.459332	CRC_vs_HC
hsa-let-7f-1-3p.iso.t5:0.seed:0.t3:c.ad:0.mm:0	6.01332	0.366546	0.187921	1.95054	0.0511121	0.157474	CRC_vs_HC
hsa-let-7f-1-3p.iso.t5:0.seed:0.t3:c.ad:A.mm:0	0.625283	0.141059	0.550893	0.256055	0.797908	0.899855	CRC_vs_HC
hsa-let-7f-1-3p.iso.t5:0.seed:0.t3:c.ad:AT.mm:0	0.0988833	-1.40638	1.78275	-0.788881	0.430181		CRC_vs_HC
hsa-let-7f-1-3p.iso.t5:0.seed:0.t3:c.ad:T.mm:0	23.7509	0.391707	0.144574	2.70938	0.00674085	0.0350433	CRC_vs_HC
hsa-let-7f-1-3p.iso.t5:0.seed:0.t3:c.ad:TA.mm:0	0.152961	0.0134392	1.26466	0.0106267	0.991521		CRC_vs_HC
hsa-let-7f-1-3p.iso.t5:0.seed:0.t3:c.ad:TAT.mm:0	0.0945682	-0.570633	1.79216	-0.318404	0.750178		CRC_vs_HC
hsa-let-7f-1-3p.iso.t5:0.seed:0.t3:c.ad:TT.mm:0	0.527463	-0.295913	0.628424	-0.470882	0.637725	0.80248	CRC_vs_HC
hsa-let-7f-1-3p.iso.t5:0.seed:0.t3:c.ad:TTA.mm:0	0.0384665	-1.05035	3.81627	-0.275229	0.78314		CRC_vs_HC
hsa-let-7f-1-3p.iso.t5:0.seed:0.t3:c.ad:TTT.mm:0	0.359625	-0.921715	0.749331	-1.23005	0.218678		CRC_vs_HC
hsa-let-7f-1-3p.iso.t5:0.seed:0.t3:cc.ad:0.mm:0	0.528361	0.249678	0.649268	0.384553	0.700568	0.844024	CRC_vs_HC
hsa-let-7f-1-3p.iso.t5:0.seed:0.t3:cc.ad:GT.mm:0	0.0357453	-0.703737	3.81623	-0.184406	0.853695		CRC_vs_HC
hsa-let-7f-1-3p.iso.t5:0.seed:0.t3:cc.ad:T.mm:0	1.33037	0.616243	0.438416	1.40561	0.159839	0.348155	CRC_vs_HC
hsa-let-7f-1-3p.iso.t5:0.seed:0.t3:cc.ad:TT.mm:0	0.533904	0.585942	0.601117	0.974756	0.329681	0.548452	CRC_vs_HC
hsa-let-7f-1-3p.iso.t5:0.seed:0.t3:ccc.ad:TT.mm:0	0.0384617	-1.29756	3.81598	-0.340034	0.733831		CRC_vs_HC
hsa-let-7f-1-3p.iso.t5:A.seed:0.t3:c.ad:0.mm:0	0.0502221	-0.124423	3.74548	-0.0332194	0.9735		CRC_vs_HC
hsa-let-7f-1-3p.iso.t5:AA.seed:0.t3:cc.ad:0.mm:0	0.14328	-0.721315	1.62173	-0.444781	0.656478		CRC_vs_HC
hsa-let-7f-1-3p.iso.t5:c.seed:0.t3:c.ad:T.mm:0	0.0988889	-0.37152	1.98832	-0.186851	0.851777		CRC_vs_HC
hsa-let-7f-2-3p.iso.t5:0.seed:0.t3:c.ad:0.mm:0	2.51405	0.0244604	0.325814	0.075075	0.940155	0.969608	CRC_vs_HC
hsa-let-7f-2-3p.iso.t5:0.seed:0.t3:c.ad:A.mm:0	0.253339	-0.98861	0.964525	-1.02497	0.305377		CRC_vs_HC
hsa-let-7f-2-3p.iso.t5:0.seed:0.t3:c.ad:T.mm:0	56.0883	0.139877	0.138585	1.00933	0.312819	0.532567	CRC_vs_HC
hsa-let-7f-2-3p.iso.t5:0.seed:0.t3:c.ad:TT.mm:0	0.117872	-1.07169	1.75686	-0.610001	0.541861		CRC_vs_HC
hsa-let-7f-2-3p.iso.t5:0.seed:0.t3:cc.ad:0.mm:0	1.09056	-0.335635	0.456873	-0.734637	0.462561	0.670514	CRC_vs_HC
hsa-let-7f-2-3p.iso.t5:0.seed:0.t3:tcc.ad:0.mm:0	0.211883	-0.739128	3.8164	-0.193672	0.846433		CRC_vs_HC
hsa-let-7f-2-3p.iso.t5:A.seed:0.t3:c.ad:T.mm:0	0.00986998	-1.03477	3.81641	-0.271137	0.786286		CRC_vs_HC
hsa-let-7f-2-3p.iso.t5:c.seed:0.t3:0.ad:T.mm:0	0.0679352	-0.827925	3.04247	-0.272123	0.785528		CRC_vs_HC
hsa-let-7f-2-3p.iso.t5:c.seed:0.t3:c.ad:T.mm:0	0.0897367	-1.00196	2.55382	-0.392337	0.69481		CRC_vs_HC
hsa-let-7f-2-3p.ref.t5:0.seed:0.t3:0.ad:0.mm:0	0.114305	0.118356	1.62731	0.0727311	0.94202		CRC_vs_HC
hsa-let-7f-5p.iso.t5:0.seed:0.t3:0.ad:A.mm:0	1696.26	-0.972654	0.180995	-5.37391	7.70459e-08	2.56219e-06	CRC_vs_HC
hsa-let-7f-5p.iso.t5:0.seed:0.t3:0.ad:AA.mm:0	51.0358	-0.831411	0.166428	-4.99561	5.86506e-07	1.43415e-05	CRC_vs_HC
hsa-let-7f-5p.iso.t5:0.seed:0.t3:0.ad:AAA.mm:0	0.975929	-0.875711	0.468673	-1.86849	0.0616937	0.180073	CRC_vs_HC
hsa-let-7f-5p.iso.t5:0.seed:0.t3:0.ad:AAT.mm:0	0.489907	-1.85762	0.813206	-2.28432	0.022353	0.0857618	CRC_vs_HC
hsa-let-7f-5p.iso.t5:0.seed:0.t3:0.ad:AC.mm:0	0.40114	-0.373491	0.646352	-0.577844	0.563369		CRC_vs_HC
hsa-let-7f-5p.iso.t5:0.seed:0.t3:0.ad:AG.mm:0	1.28619	-0.740424	0.483307	-1.532	0.125523	0.296348	CRC_vs_HC
hsa-let-7f-5p.iso.t5:0.seed:0.t3:0.ad:AGA.mm:0	0.0792183	-0.950191	2.2747	-0.417721	0.676151		CRC_vs_HC
hsa-let-7f-5p.iso.t5:0.seed:0.t3:0.ad:AT.mm:0	17.4215	-1.05994	0.211589	-5.00943	5.45924e-07	1.35329e-05	CRC_vs_HC
hsa-let-7f-5p.iso.t5:0.seed:0.t3:0.ad:ATT.mm:0	0.231188	-0.796727	0.865769	-0.920254	0.35744		CRC_vs_HC
hsa-let-7f-5p.iso.t5:0.seed:0.t3:0.ad:C.mm:0	8.17197	-0.645157	0.242875	-2.65633	0.00789966	0.0394363	CRC_vs_HC
hsa-let-7f-5p.iso.t5:0.seed:0.t3:0.ad:CA.mm:0	0.157685	-0.540052	2.7925	-0.193393	0.846651		CRC_vs_HC
hsa-let-7f-5p.iso.t5:0.seed:0.t3:0.ad:CT.mm:0	0.1375	-1.2744	1.9767	-0.644715	0.519112		CRC_vs_HC
hsa-let-7f-5p.iso.t5:0.seed:0.t3:G.ad:0.mm:0	96.0527	-0.881487	0.177722	-4.95993	7.05188e-07	1.68621e-05	CRC_vs_HC
hsa-let-7f-5p.iso.t5:0.seed:0.t3:G.ad:A.mm:0	1.97819	-1.23091	0.416703	-2.95392	0.00313765	0.0191946	CRC_vs_HC
hsa-let-7f-5p.iso.t5:0.seed:0.t3:G.ad:AA.mm:0	0.0511307	-1.11579	3.81632	-0.292373	0.770001		CRC_vs_HC
hsa-let-7f-5p.iso.t5:0.seed:0.t3:G.ad:CCA.mm:0	0.0444788	-0.462496	3.80482	-0.121555	0.903251		CRC_vs_HC
hsa-let-7f-5p.iso.t5:0.seed:0.t3:G.ad:GG.mm:0	0.0460642	-0.185619	3.7866	-0.0490199	0.960903		CRC_vs_HC
hsa-let-7f-5p.iso.t5:0.seed:0.t3:G.ad:GGC.mm:0	0.225152	0.768841	1.19144	0.645307	0.518728		CRC_vs_HC
hsa-let-7f-5p.iso.t5:0.seed:0.t3:G.ad:GGG.mm:0	0.0513578	-0.302252	3.73012	-0.0810302	0.935418		CRC_vs_HC
hsa-let-7f-5p.iso.t5:0.seed:0.t3:GT.ad:0.mm:0	7.96659	-0.788583	0.199288	-3.957	7.58957e-05	0.000911171	CRC_vs_HC
hsa-let-7f-5p.iso.t5:0.seed:0.t3:GT.ad:A.mm:0	0.0317574	-1.39186	3.81575	-0.364767	0.715285		CRC_vs_HC
hsa-let-7f-5p.iso.t5:0.seed:0.t3:gtt.ad:0.mm:0	148.597	-1.06465	0.190088	-5.60084	2.13316e-08	8.50744e-07	CRC_vs_HC
hsa-let-7f-5p.iso.t5:0.seed:0.t3:gtt.ad:A.mm:0	20.5208	-1.11872	0.264277	-4.23312	2.30469e-05	0.000334799	CRC_vs_HC
hsa-let-7f-5p.iso.t5:0.seed:0.t3:gtt.ad:AA.mm:0	11.566	-0.893616	0.355822	-2.51141	0.0120249	0.0542652	CRC_vs_HC
hsa-let-7f-5p.iso.t5:0.seed:0.t3:gtt.ad:AAA.mm:0	4.03738	-0.925492	0.371932	-2.48834	0.0128342	0.056756	CRC_vs_HC
hsa-let-7f-5p.iso.t5:0.seed:0.t3:gtt.ad:AAT.mm:0	0.196946	-0.180129	1.03385	-0.174231	0.861684		CRC_vs_HC
hsa-let-7f-5p.iso.t5:0.seed:0.t3:gtt.ad:AG.mm:0	0.136608	-1.17355	1.94383	-0.603729	0.546024		CRC_vs_HC
hsa-let-7f-5p.iso.t5:0.seed:0.t3:gtt.ad:AT.mm:0	2.30212	-1.71641	0.441622	-3.8866	0.000101657	0.00115411	CRC_vs_HC
hsa-let-7f-5p.iso.t5:0.seed:0.t3:gtt.ad:ATA.mm:0	0.0993236	-0.956386	1.9882	-0.48103	0.630495		CRC_vs_HC
hsa-let-7f-5p.iso.t5:0.seed:0.t3:gtt.ad:ATT.mm:0	10.1654	-1.13485	0.386122	-2.93909	0.00329182	0.0198871	CRC_vs_HC
hsa-let-7f-5p.iso.t5:0.seed:0.t3:gtt.ad:C.mm:0	0.307657	-0.871981	1.20101	-0.726039	0.467815		CRC_vs_HC
hsa-let-7f-5p.iso.t5:0.seed:0.t3:gtt.ad:CA.mm:0	0.249488	-0.887353	3.06021	-0.289965	0.771843		CRC_vs_HC
hsa-let-7f-5p.iso.t5:0.seed:0.t3:gtt.ad:CAA.mm:0	0.0628159	-0.891988	3.81612	-0.233742	0.815185		CRC_vs_HC
hsa-let-7f-5p.iso.t5:0.seed:0.t3:gtt.ad:CAT.mm:0	0.0327772	-0.771899	3.81627	-0.202265	0.839709		CRC_vs_HC
hsa-let-7f-5p.iso.t5:0.seed:0.t3:gtt.ad:CCT.mm:0	0.116437	-1.33947	1.78511	-0.750354	0.453041		CRC_vs_HC
hsa-let-7f-5p.iso.t5:0.seed:0.t3:gtt.ad:CT.mm:0	1.23211	-2.05774	0.616442	-3.3381	0.000843543	0.00661612	CRC_vs_HC
hsa-let-7f-5p.iso.t5:0.seed:0.t3:gtt.ad:CTA.mm:0	0.045667	-1.04739	3.81595	-0.274476	0.783719		CRC_vs_HC
hsa-let-7f-5p.iso.t5:0.seed:0.t3:gtt.ad:CTT.mm:0	9.10106	-1.89274	0.362053	-5.22781	1.7153e-07	5.25182e-06	CRC_vs_HC
hsa-let-7f-5p.iso.t5:0.seed:0.t3:gtt.ad:T.mm:0	2.4386	-1.12702	0.378667	-2.97629	0.00291757	0.0180913	CRC_vs_HC
hsa-let-7f-5p.iso.t5:0.seed:0.t3:gtt.ad:TA.mm:0	0.146683	-1.04608	1.32154	-0.791556	0.428619		CRC_vs_HC
hsa-let-7f-5p.iso.t5:0.seed:0.t3:gtt.ad:TCT.mm:0	0.612578	0.706508	0.708875	0.99666	0.31893	0.538353	CRC_vs_HC
hsa-let-7f-5p.iso.t5:0.seed:0.t3:gtt.ad:TT.mm:0	2.17626	-0.64392	0.405273	-1.58886	0.112093	0.273784	CRC_vs_HC
hsa-let-7f-5p.iso.t5:0.seed:0.t3:gtt.ad:TTT.mm:0	15.8091	-0.797369	0.316581	-2.51869	0.0117793	0.0534471	CRC_vs_HC
hsa-let-7f-5p.iso.t5:0.seed:0.t3:t.ad:0.mm:0	6353.52	-1.05633	0.180582	-5.84959	4.92789e-09	2.35667e-07	CRC_vs_HC
hsa-let-7f-5p.iso.t5:0.seed:0.t3:T.ad:0.mm:0	1298.1	-0.878689	0.173522	-5.06385	4.10877e-07	1.06493e-05	CRC_vs_HC
hsa-let-7f-5p.iso.t5:0.seed:0.t3:t.ad:A.mm:0	173.353	-1.01239	0.196115	-5.16223	2.44031e-07	7.0521e-06	CRC_vs_HC
hsa-let-7f-5p.iso.t5:0.seed:0.t3:T.ad:A.mm:0	10.9544	-0.806157	0.250669	-3.21603	0.00129979	0.00940935	CRC_vs_HC
hsa-let-7f-5p.iso.t5:0.seed:0.t3:t.ad:AA.mm:0	47.7283	-1.15	0.226345	-5.08074	3.75972e-07	9.88687e-06	CRC_vs_HC
hsa-let-7f-5p.iso.t5:0.seed:0.t3:T.ad:AA.mm:0	0.0568218	-0.753483	3.6879	-0.204312	0.83811		CRC_vs_HC
hsa-let-7f-5p.iso.t5:0.seed:0.t3:t.ad:AAA.mm:0	1.88526	-0.7875	0.449484	-1.75201	0.0797719	0.216464	CRC_vs_HC
hsa-let-7f-5p.iso.t5:0.seed:0.t3:t.ad:AAT.mm:0	0.595184	-1.43255	0.735824	-1.94687	0.0515506	0.158149	CRC_vs_HC
hsa-let-7f-5p.iso.t5:0.seed:0.t3:t.ad:AC.mm:0	0.318653	-0.781063	0.973044	-0.8027	0.422148		CRC_vs_HC
hsa-let-7f-5p.iso.t5:0.seed:0.t3:t.ad:AG.mm:0	1.87482	-1.42621	0.419284	-3.40152	0.000670118	0.00541303	CRC_vs_HC
hsa-let-7f-5p.iso.t5:0.seed:0.t3:t.ad:AT.mm:0	8.88123	-0.816314	0.256576	-3.18156	0.00146483	0.0103409	CRC_vs_HC
hsa-let-7f-5p.iso.t5:0.seed:0.t3:t.ad:C.mm:0	4.37749	-0.367347	0.269315	-1.36401	0.172565	0.366133	CRC_vs_HC
hsa-let-7f-5p.iso.t5:0.seed:0.t3:T.ad:C.mm:0	0.126921	-0.795581	1.77787	-0.447491	0.654521		CRC_vs_HC
hsa-let-7f-5p.iso.t5:0.seed:0.t3:t.ad:CA.mm:0	0.492512	-0.174551	0.681219	-0.256233	0.797771	0.899844	CRC_vs_HC
hsa-let-7f-5p.iso.t5:0.seed:0.t3:t.ad:CT.mm:0	0.310029	-0.462717	0.958122	-0.482941	0.629137		CRC_vs_HC
hsa-let-7f-5p.iso.t5:0.seed:0.t3:t.ad:G.mm:0	16.1052	-0.665184	0.264057	-2.51909	0.0117657	0.0534291	CRC_vs_HC
hsa-let-7f-5p.iso.t5:0.seed:0.t3:T.ad:G.mm:0	0.567141	-1.01737	0.551496	-1.84475	0.065074	0.187103	CRC_vs_HC
hsa-let-7f-5p.iso.t5:0.seed:0.t3:t.ad:GA.mm:0	1.44357	-0.335817	0.462933	-0.72541	0.4682	0.675187	CRC_vs_HC
hsa-let-7f-5p.iso.t5:0.seed:0.t3:t.ad:GAA.mm:0	0.0583312	-1.15681	3.09743	-0.373473	0.708796		CRC_vs_HC
hsa-let-7f-5p.iso.t5:0.seed:0.t3:t.ad:GT.mm:0	0.777806	-1.29499	0.559189	-2.31584	0.0205669	0.0810379	CRC_vs_HC
hsa-let-7f-5p.iso.t5:0.seed:0.t3:tt.ad:0.mm:0	543.819	-1.27893	0.176048	-7.26466	3.73974e-13	6.73651e-11	CRC_vs_HC
hsa-let-7f-5p.iso.t5:0.seed:0.t3:TT.ad:0.mm:0	9.80458	-0.724159	0.225968	-3.2047	0.00135201	0.00969646	CRC_vs_HC
hsa-let-7f-5p.iso.t5:0.seed:0.t3:tt.ad:A.mm:0	66.6383	-1.49718	0.216202	-6.92495	4.36144e-12	5.35665e-10	CRC_vs_HC
hsa-let-7f-5p.iso.t5:0.seed:0.t3:tt.ad:AA.mm:0	9.66528	-1.22322	0.267235	-4.57733	4.70949e-06	8.56905e-05	CRC_vs_HC
hsa-let-7f-5p.iso.t5:0.seed:0.t3:tt.ad:AAA.mm:0	3.21065	-1.06946	0.387461	-2.76018	0.00577702	0.0312073	CRC_vs_HC
hsa-let-7f-5p.iso.t5:0.seed:0.t3:tt.ad:AAG.mm:0	0.066173	-1.10638	2.64499	-0.418292	0.675733		CRC_vs_HC
hsa-let-7f-5p.iso.t5:0.seed:0.t3:tt.ad:AAT.mm:0	0.369849	-1.35538	0.707072	-1.91689	0.0552524		CRC_vs_HC
hsa-let-7f-5p.iso.t5:0.seed:0.t3:tt.ad:ACT.mm:0	0.0343176	0	3.81647	0	1		CRC_vs_HC
hsa-let-7f-5p.iso.t5:0.seed:0.t3:tt.ad:AGA.mm:0	0.170843	-1.49829	1.43803	-1.0419	0.297459		CRC_vs_HC
hsa-let-7f-5p.iso.t5:0.seed:0.t3:tt.ad:AT.mm:0	6.84082	0.562647	0.253206	2.22209	0.0262772	0.0966002	CRC_vs_HC
hsa-let-7f-5p.iso.t5:0.seed:0.t3:tt.ad:ATA.mm:0	0.506856	-0.526523	0.622336	-0.846043	0.397529	0.611637	CRC_vs_HC
hsa-let-7f-5p.iso.t5:0.seed:0.t3:tt.ad:ATT.mm:0	0.455851	0.87999	0.751397	1.17114	0.241543	0.450647	CRC_vs_HC
hsa-let-7f-5p.iso.t5:0.seed:0.t3:tt.ad:C.mm:0	0.570992	-1.41147	0.700894	-2.01382	0.0440283	0.141498	CRC_vs_HC
hsa-let-7f-5p.iso.t5:0.seed:0.t3:tt.ad:CA.mm:0	0.224285	-1.58868	1.21781	-1.30454	0.192051		CRC_vs_HC
hsa-let-7f-5p.iso.t5:0.seed:0.t3:tt.ad:CT.mm:0	15.6423	-0.624839	0.270832	-2.30711	0.0210488	0.0822472	CRC_vs_HC
hsa-let-7f-5p.iso.t5:0.seed:0.t3:tt.ad:CTA.mm:0	0.375589	-1.58306	0.844622	-1.87428	0.0608918		CRC_vs_HC
hsa-let-7f-5p.iso.t5:0.seed:0.t3:tt.ad:CTT.mm:0	0.555715	-1.84738	0.604912	-3.05396	0.0022584	0.0147753	CRC_vs_HC
hsa-let-7f-5p.iso.t5:0.seed:0.t3:tt.ad:G.mm:0	2.34587	-0.764007	0.403198	-1.89487	0.0581103	0.172353	CRC_vs_HC
hsa-let-7f-5p.iso.t5:0.seed:0.t3:tt.ad:GA.mm:0	0.181341	-0.851441	1.55813	-0.54645	0.584757		CRC_vs_HC
hsa-let-7f-5p.iso.t5:0.seed:0.t3:tt.ad:GT.mm:0	5.88009	-1.74246	0.265682	-6.55846	5.43654e-11	4.73856e-09	CRC_vs_HC
hsa-let-7f-5p.iso.t5:0.seed:0.t3:tt.ad:GTA.mm:0	0.561185	-1.32249	0.737523	-1.79315	0.0729482	0.202836	CRC_vs_HC
hsa-let-7f-5p.iso.t5:0.seed:0.t3:tt.ad:GTT.mm:0	0.38327	-0.661927	0.726711	-0.910853	0.362373		CRC_vs_HC
hsa-let-7f-5p.iso.t5:0.seed:0.t3:TT.ad:T.mm:0	0.134513	-0.0414081	1.23067	-0.0336468	0.973159		CRC_vs_HC
hsa-let-7f-5p.iso.t5:0.seed:0.t3:TT.ad:TT.mm:0	0.0679369	-0.517239	3.04082	-0.170098	0.864933		CRC_vs_HC
hsa-let-7f-5p.iso.t5:A.seed:0.t3:0.ad:0.mm:0	31.1465	-0.0627069	0.147812	-0.424235	0.671394	0.825283	CRC_vs_HC
hsa-let-7f-5p.iso.t5:A.seed:0.t3:0.ad:A.mm:0	1.06872	-0.238182	0.483437	-0.492685	0.622235	0.790725	CRC_vs_HC
hsa-let-7f-5p.iso.t5:A.seed:0.t3:gtt.ad:0.mm:0	0.259721	-1.14096	0.824726	-1.38344	0.16653		CRC_vs_HC
hsa-let-7f-5p.iso.t5:A.seed:0.t3:gtt.ad:ATT.mm:0	0.0100131	-0.808556	3.81636	-0.211866	0.832212		CRC_vs_HC
hsa-let-7f-5p.iso.t5:A.seed:0.t3:t.ad:0.mm:0	6.82333	-0.158965	0.249734	-0.63654	0.524425	0.722496	CRC_vs_HC
hsa-let-7f-5p.iso.t5:A.seed:0.t3:T.ad:0.mm:0	0.944475	0.12825	0.49418	0.25952	0.795234	0.899141	CRC_vs_HC
hsa-let-7f-5p.iso.t5:A.seed:0.t3:t.ad:A.mm:0	0.137454	-0.462168	1.24264	-0.371925	0.709949		CRC_vs_HC
hsa-let-7f-5p.iso.t5:A.seed:0.t3:tt.ad:0.mm:0	0.450291	-0.891941	0.683959	-1.30409	0.192204	0.390552	CRC_vs_HC
hsa-let-7f-5p.iso.t5:AG.seed:0.t3:0.ad:0.mm:0	0.0916656	-0.661283	1.99482	-0.331499	0.740267		CRC_vs_HC
hsa-let-7f-5p.iso.t5:G.seed:0.t3:0.ad:0.mm:0	0.411486	-0.648417	1.50482	-0.430893	0.666546	0.821757	CRC_vs_HC
hsa-let-7f-5p.iso.t5:G.seed:0.t3:t.ad:0.mm:0	0.145229	-0.437552	2.44362	-0.179059	0.857892		CRC_vs_HC
hsa-let-7f-5p.iso.t5:GA.seed:0.t3:0.ad:0.mm:0	0.188699	-0.14719	1.32457	-0.111123	0.911519		CRC_vs_HC
hsa-let-7f-5p.iso.t5:GAG.seed:0.t3:0.ad:0.mm:0	0.596745	0.912161	0.763207	1.19517	0.232021	0.439739	CRC_vs_HC
hsa-let-7f-5p.iso.t5:t.seed:0.t3:0.ad:0.mm:0	4.19386	0.206295	0.301073	0.685199	0.493218	0.698742	CRC_vs_HC
hsa-let-7f-5p.iso.t5:t.seed:0.t3:0.ad:A.mm:0	0.342464	0.443182	0.683527	0.648375	0.516743		CRC_vs_HC
hsa-let-7f-5p.iso.t5:t.seed:0.t3:t.ad:0.mm:0	1.26894	0.0807449	0.596543	0.135355	0.892331	0.946264	CRC_vs_HC
hsa-let-7f-5p.iso.t5:t.seed:0.t3:T.ad:0.mm:0	0.265427	-0.187924	1.35707	-0.138477	0.889863		CRC_vs_HC
hsa-let-7f-5p.iso.t5:t.seed:0.t3:t.ad:AA.mm:0	0.0263267	-0.595124	3.81646	-0.155936	0.876083		CRC_vs_HC
hsa-let-7f-5p.iso.t5:tg.seed:0.t3:0.ad:0.mm:0	0.194017	-1.18017	1.31536	-0.897224	0.369599		CRC_vs_HC
hsa-let-7f-5p.iso.t5:tg.seed:0.t3:GT.ad:0.mm:0	0.0639151	-1.45483	3.05754	-0.475816	0.634205		CRC_vs_HC
hsa-let-7f-5p.iso.t5:tga.seed:0.t3:0.ad:0.mm:0	6.79393	-0.706633	0.42996	-1.64348	0.100283	0.253119	CRC_vs_HC
hsa-let-7f-5p.iso.t5:tga.seed:0.t3:0.ad:A.mm:0	0.249162	-1.03838	1.41767	-0.732457	0.46389		CRC_vs_HC
hsa-let-7f-5p.iso.t5:tga.seed:0.t3:t.ad:0.mm:0	1.24457	-0.333734	0.783829	-0.425774	0.670272	0.824716	CRC_vs_HC
hsa-let-7f-5p.iso.t5:tga.seed:0.t3:T.ad:0.mm:0	0.199433	-1.18488	1.59644	-0.742205	0.457963		CRC_vs_HC
hsa-let-7f-5p.ref.t5:0.seed:0.t3:0.ad:0.mm:0	33306.7	-0.802778	0.159469	-5.03406	4.8019e-07	1.20657e-05	CRC_vs_HC
hsa-let-7g-3p.iso.t5:0.seed:0.t3:0.ad:A.mm:0	1.46175	-0.493962	0.393969	-1.25381	0.209912	0.413041	CRC_vs_HC
hsa-let-7g-3p.iso.t5:0.seed:0.t3:0.ad:T.mm:0	15.1244	-0.434806	0.144	-3.0195	0.00253196	0.0161448	CRC_vs_HC
hsa-let-7g-3p.iso.t5:0.seed:0.t3:0.ad:TT.mm:0	0.266102	0.128503	0.82481	0.155797	0.876193		CRC_vs_HC
hsa-let-7g-3p.iso.t5:0.seed:0.t3:0.ad:TTT.mm:0	0.0886485	-0.547932	3.48749	-0.157113	0.875155		CRC_vs_HC
hsa-let-7g-3p.iso.t5:0.seed:0.t3:c.ad:0.mm:0	1.93594	-1.68276	0.413278	-4.07175	4.66621e-05	0.000609087	CRC_vs_HC
hsa-let-7g-3p.iso.t5:0.seed:0.t3:C.ad:0.mm:0	0.755001	-0.400671	0.548855	-0.730013	0.465382	0.67271	CRC_vs_HC
hsa-let-7g-3p.iso.t5:0.seed:0.t3:c.ad:A.mm:0	0.262919	-0.613295	0.885594	-0.692524	0.488608		CRC_vs_HC
hsa-let-7g-3p.iso.t5:0.seed:0.t3:c.ad:T.mm:0	0.229905	-0.684188	1.02612	-0.66677	0.504919		CRC_vs_HC
hsa-let-7g-3p.iso.t5:0.seed:0.t3:C.ad:T.mm:0	0.155941	-0.994827	1.36793	-0.72725	0.467073		CRC_vs_HC
hsa-let-7g-3p.iso.t5:0.seed:0.t3:tgc.ad:0.mm:0	0.0680669	-1.10091	2.62068	-0.420086	0.674423		CRC_vs_HC
hsa-let-7g-3p.iso.t5:A.seed:0.t3:0.ad:0.mm:0	0.264377	0.647597	0.911432	0.710527	0.477378		CRC_vs_HC
hsa-let-7g-3p.iso.t5:AA.seed:0.t3:0.ad:0.mm:0	0.205706	0.00964851	1.01275	0.00952705	0.992399		CRC_vs_HC
hsa-let-7g-3p.ref.t5:0.seed:0.t3:0.ad:0.mm:0	5.5422	-0.510387	0.236391	-2.15908	0.030844	0.108835	CRC_vs_HC
hsa-let-7g-5p.iso.t5:0.seed:0.t3:0.ad:A.mm:0	794.177	-0.944648	0.135634	-6.96466	3.29202e-12	4.44752e-10	CRC_vs_HC
hsa-let-7g-5p.iso.t5:0.seed:0.t3:0.ad:AA.mm:0	45.8068	-0.941619	0.180418	-5.2191	1.79798e-07	5.41297e-06	CRC_vs_HC
hsa-let-7g-5p.iso.t5:0.seed:0.t3:0.ad:AAA.mm:0	1.69679	-0.44734	0.424873	-1.05288	0.292397	0.510372	CRC_vs_HC
hsa-let-7g-5p.iso.t5:0.seed:0.t3:0.ad:AAG.mm:0	0.139779	-1.69845	1.76976	-0.959709	0.337202		CRC_vs_HC
hsa-let-7g-5p.iso.t5:0.seed:0.t3:0.ad:AAT.mm:0	0.422429	-0.314049	0.706032	-0.444809	0.656458	0.815338	CRC_vs_HC
hsa-let-7g-5p.iso.t5:0.seed:0.t3:0.ad:AC.mm:0	0.316836	-0.504434	0.90326	-0.55846	0.57653		CRC_vs_HC
hsa-let-7g-5p.iso.t5:0.seed:0.t3:0.ad:AG.mm:0	1.89955	-1.44237	0.41021	-3.51617	0.000437819	0.00384711	CRC_vs_HC
hsa-let-7g-5p.iso.t5:0.seed:0.t3:0.ad:AGA.mm:0	0.326753	-0.306819	0.817431	-0.375345	0.707404		CRC_vs_HC
hsa-let-7g-5p.iso.t5:0.seed:0.t3:0.ad:AGT.mm:0	0.0721353	-1.23203	2.60388	-0.47315	0.636106		CRC_vs_HC
hsa-let-7g-5p.iso.t5:0.seed:0.t3:0.ad:AT.mm:0	20.2843	-0.921516	0.209681	-4.39485	1.10849e-05	0.000180431	CRC_vs_HC
hsa-let-7g-5p.iso.t5:0.seed:0.t3:0.ad:ATA.mm:0	0.135786	-1.20149	1.96701	-0.610822	0.541318		CRC_vs_HC
hsa-let-7g-5p.iso.t5:0.seed:0.t3:0.ad:ATT.mm:0	0.298611	-0.727906	0.8982	-0.810405	0.417708		CRC_vs_HC
hsa-let-7g-5p.iso.t5:0.seed:0.t3:0.ad:C.mm:0	2.84996	-0.568436	0.376629	-1.50927	0.131229	0.305673	CRC_vs_HC
hsa-let-7g-5p.iso.t5:0.seed:0.t3:0.ad:CCA.mm:0	0.0221159	-1.12849	3.81635	-0.295699	0.76746		CRC_vs_HC
hsa-let-7g-5p.iso.t5:0.seed:0.t3:0.ad:CT.mm:0	0.0769907	-1.06544	2.58471	-0.412209	0.680186		CRC_vs_HC
hsa-let-7g-5p.iso.t5:0.seed:0.t3:0.ad:G.mm:0	39.7723	-1.02585	0.168777	-6.07814	1.21588e-09	7.06515e-08	CRC_vs_HC
hsa-let-7g-5p.iso.t5:0.seed:0.t3:0.ad:GA.mm:0	1.97594	-1.70326	0.380382	-4.47775	7.54333e-06	0.000129205	CRC_vs_HC
hsa-let-7g-5p.iso.t5:0.seed:0.t3:0.ad:GT.mm:0	1.57337	-2.64963	0.526151	-5.03587	4.75685e-07	1.19841e-05	CRC_vs_HC
hsa-let-7g-5p.iso.t5:0.seed:0.t3:gtt.ad:0.mm:0	71.7898	-1.25898	0.216803	-5.80701	6.35995e-09	2.96757e-07	CRC_vs_HC
hsa-let-7g-5p.iso.t5:0.seed:0.t3:gtt.ad:A.mm:0	2.93007	-1.60342	0.351493	-4.56174	5.07304e-06	9.16881e-05	CRC_vs_HC
hsa-let-7g-5p.iso.t5:0.seed:0.t3:gtt.ad:AA.mm:0	1.97494	-1.00203	0.412063	-2.43174	0.0150265	0.0640149	CRC_vs_HC
hsa-let-7g-5p.iso.t5:0.seed:0.t3:gtt.ad:AAA.mm:0	0.650548	-1.02892	0.702709	-1.46422	0.143133	0.323502	CRC_vs_HC
hsa-let-7g-5p.iso.t5:0.seed:0.t3:gtt.ad:AAG.mm:0	0.0359831	-1.0444	3.81636	-0.273665	0.784342		CRC_vs_HC
hsa-let-7g-5p.iso.t5:0.seed:0.t3:gtt.ad:AT.mm:0	0.496713	-1.5121	0.693936	-2.17902	0.0293301	0.104623	CRC_vs_HC
hsa-let-7g-5p.iso.t5:0.seed:0.t3:gtt.ad:ATT.mm:0	3.82497	-1.32777	0.393028	-3.37832	0.000729303	0.00581291	CRC_vs_HC
hsa-let-7g-5p.iso.t5:0.seed:0.t3:gtt.ad:C.mm:0	0.0361318	-0.722235	3.81618	-0.189256	0.849892		CRC_vs_HC
hsa-let-7g-5p.iso.t5:0.seed:0.t3:gtt.ad:CA.mm:0	0.0217131	-0.861662	3.81621	-0.22579	0.821365		CRC_vs_HC
hsa-let-7g-5p.iso.t5:0.seed:0.t3:gtt.ad:CT.mm:0	0.303642	-0.959133	1.08562	-0.88349	0.376972		CRC_vs_HC
hsa-let-7g-5p.iso.t5:0.seed:0.t3:gtt.ad:CTT.mm:0	3.51865	-1.89673	0.453885	-4.17887	2.92962e-05	0.000407507	CRC_vs_HC
hsa-let-7g-5p.iso.t5:0.seed:0.t3:gtt.ad:T.mm:0	0.184281	-1.1558	1.05411	-1.09647	0.272874		CRC_vs_HC
hsa-let-7g-5p.iso.t5:0.seed:0.t3:gtt.ad:TT.mm:0	0.803817	-1.44175	0.755488	-1.90837	0.056344	0.168595	CRC_vs_HC
hsa-let-7g-5p.iso.t5:0.seed:0.t3:gtt.ad:TTT.mm:0	3.50858	-1.03325	0.406082	-2.54444	0.0109453	0.0505972	CRC_vs_HC
hsa-let-7g-5p.iso.t5:0.seed:0.t3:t.ad:0.mm:0	2106.58	-1.36074	0.155125	-8.77193	1.75633e-18	1.05458e-15	CRC_vs_HC
hsa-let-7g-5p.iso.t5:0.seed:0.t3:T.ad:0.mm:0	520.471	-1.00443	0.17025	-5.89973	3.64107e-09	1.83891e-07	CRC_vs_HC
hsa-let-7g-5p.iso.t5:0.seed:0.t3:t.ad:A.mm:0	55.5199	-1.06787	0.173371	-6.15944	7.30012e-10	4.61402e-08	CRC_vs_HC
hsa-let-7g-5p.iso.t5:0.seed:0.t3:T.ad:A.mm:0	4.81675	-1.1291	0.291139	-3.87824	0.000105216	0.00118827	CRC_vs_HC
hsa-let-7g-5p.iso.t5:0.seed:0.t3:t.ad:AA.mm:0	14.1462	-0.983756	0.228491	-4.30545	1.66644e-05	0.000254752	CRC_vs_HC
hsa-let-7g-5p.iso.t5:0.seed:0.t3:T.ad:AA.mm:0	0.139874	-1.28107	1.74719	-0.733218	0.463426		CRC_vs_HC
hsa-let-7g-5p.iso.t5:0.seed:0.t3:t.ad:AAA.mm:0	0.567243	-0.727908	0.616606	-1.18051	0.237799	0.44628	CRC_vs_HC
hsa-let-7g-5p.iso.t5:0.seed:0.t3:T.ad:AAA.mm:0	0.0565367	-0.890015	2.6686	-0.333514	0.738746		CRC_vs_HC
hsa-let-7g-5p.iso.t5:0.seed:0.t3:t.ad:AAT.mm:0	0.0952313	-0.805529	2.23463	-0.360476	0.718491		CRC_vs_HC
hsa-let-7g-5p.iso.t5:0.seed:0.t3:t.ad:AG.mm:0	1.20472	-1.75553	0.482396	-3.63918	0.000273505	0.00262526	CRC_vs_HC
hsa-let-7g-5p.iso.t5:0.seed:0.t3:t.ad:AGA.mm:0	0.176524	-0.517002	1.2816	-0.403404	0.686651		CRC_vs_HC
hsa-let-7g-5p.iso.t5:0.seed:0.t3:T.ad:AGA.mm:0	0.0533961	-0.612499	3.13331	-0.19548	0.845017		CRC_vs_HC
hsa-let-7g-5p.iso.t5:0.seed:0.t3:t.ad:AT.mm:0	2.76896	-1.43724	0.380444	-3.77781	0.000158216	0.00166342	CRC_vs_HC
hsa-let-7g-5p.iso.t5:0.seed:0.t3:t.ad:C.mm:0	1.91953	-0.80142	0.432645	-1.85237	0.063972	0.184721	CRC_vs_HC
hsa-let-7g-5p.iso.t5:0.seed:0.t3:t.ad:CA.mm:0	0.62699	-0.847615	0.607386	-1.39551	0.162862	0.352606	CRC_vs_HC
hsa-let-7g-5p.iso.t5:0.seed:0.t3:t.ad:CT.mm:0	0.536071	-0.397747	0.651784	-0.610243	0.541701	0.734224	CRC_vs_HC
hsa-let-7g-5p.iso.t5:0.seed:0.t3:t.ad:G.mm:0	8.80042	-0.505991	0.293265	-1.72537	0.0844611	0.225508	CRC_vs_HC
hsa-let-7g-5p.iso.t5:0.seed:0.t3:t.ad:GA.mm:0	0.51531	-0.939278	0.72207	-1.30081	0.193323	0.391867	CRC_vs_HC
hsa-let-7g-5p.iso.t5:0.seed:0.t3:t.ad:GAA.mm:0	0.0209274	-0.943492	3.81641	-0.24722	0.804738		CRC_vs_HC
hsa-let-7g-5p.iso.t5:0.seed:0.t3:t.ad:GT.mm:0	0.321023	-1.3603	0.861434	-1.57911	0.11431		CRC_vs_HC
hsa-let-7g-5p.iso.t5:0.seed:0.t3:t.ad:GTT.mm:0	0.0408226	-1.05523	3.8164	-0.276499	0.782165		CRC_vs_HC
hsa-let-7g-5p.iso.t5:0.seed:0.t3:T.ad:T.mm:0	8.59384	-1.16213	0.253656	-4.58152	4.61599e-06	8.42608e-05	CRC_vs_HC
hsa-let-7g-5p.iso.t5:0.seed:0.t3:T.ad:TA.mm:0	0.108267	-1.6748	1.76277	-0.950097	0.342063		CRC_vs_HC
hsa-let-7g-5p.iso.t5:0.seed:0.t3:T.ad:TT.mm:0	0.248124	-1.26904	0.931378	-1.36254	0.173028		CRC_vs_HC
hsa-let-7g-5p.iso.t5:0.seed:0.t3:T.ad:TTT.mm:0	0.129682	-1.25067	2.48443	-0.503402	0.614681		CRC_vs_HC
hsa-let-7g-5p.iso.t5:0.seed:0.t3:TG.ad:0.mm:0	0.348047	-0.562769	0.828026	-0.679651	0.496725		CRC_vs_HC
hsa-let-7g-5p.iso.t5:0.seed:0.t3:tt.ad:0.mm:0	177.333	-1.35033	0.153012	-8.82504	1.09419e-18	6.95646e-16	CRC_vs_HC
hsa-let-7g-5p.iso.t5:0.seed:0.t3:tt.ad:A.mm:0	21.4658	-1.50143	0.214665	-6.99428	2.66631e-12	3.74253e-10	CRC_vs_HC
hsa-let-7g-5p.iso.t5:0.seed:0.t3:tt.ad:AA.mm:0	3.4328	-1.05763	0.347148	-3.04663	0.00231419	0.0150583	CRC_vs_HC
hsa-let-7g-5p.iso.t5:0.seed:0.t3:tt.ad:AAA.mm:0	0.830722	-1.16136	0.631406	-1.83932	0.0658684	0.188935	CRC_vs_HC
hsa-let-7g-5p.iso.t5:0.seed:0.t3:tt.ad:AAT.mm:0	0.144782	-0.568572	2.80029	-0.20304	0.839104		CRC_vs_HC
hsa-let-7g-5p.iso.t5:0.seed:0.t3:tt.ad:AG.mm:0	0.0208123	-1.00927	3.81636	-0.264458	0.791427		CRC_vs_HC
hsa-let-7g-5p.iso.t5:0.seed:0.t3:tt.ad:AT.mm:0	2.39751	0.232125	0.322533	0.719692	0.471715	0.678506	CRC_vs_HC
hsa-let-7g-5p.iso.t5:0.seed:0.t3:tt.ad:ATA.mm:0	0.162818	-0.529649	1.16349	-0.455223	0.648949		CRC_vs_HC
hsa-let-7g-5p.iso.t5:0.seed:0.t3:tt.ad:ATT.mm:0	0.237741	-1.12602	0.95482	-1.1793	0.238278		CRC_vs_HC
hsa-let-7g-5p.iso.t5:0.seed:0.t3:tt.ad:C.mm:0	0.2335	-0.889249	0.883842	-1.00612	0.314359		CRC_vs_HC
hsa-let-7g-5p.iso.t5:0.seed:0.t3:tt.ad:CA.mm:0	0.172701	-1.26908	2.11851	-0.599042	0.549145		CRC_vs_HC
hsa-let-7g-5p.iso.t5:0.seed:0.t3:tt.ad:CT.mm:0	4.28999	-0.824723	0.306704	-2.68899	0.00716695	0.036607	CRC_vs_HC
hsa-let-7g-5p.iso.t5:0.seed:0.t3:tt.ad:CTA.mm:0	0.308829	-1.49502	0.954567	-1.56617	0.117308		CRC_vs_HC
hsa-let-7g-5p.iso.t5:0.seed:0.t3:tt.ad:CTT.mm:0	0.165345	-0.827231	1.06832	-0.774331	0.438735		CRC_vs_HC
hsa-let-7g-5p.iso.t5:0.seed:0.t3:tt.ad:G.mm:0	2.60186	-1.27643	0.386823	-3.29978	0.00096761	0.00743807	CRC_vs_HC
hsa-let-7g-5p.iso.t5:0.seed:0.t3:tt.ad:GT.mm:0	2.33589	-1.66865	0.463629	-3.5991	0.00031932	0.00300628	CRC_vs_HC
hsa-let-7g-5p.iso.t5:0.seed:0.t3:tt.ad:GTA.mm:0	0.220855	0.014809	0.938374	0.0157816	0.987409		CRC_vs_HC
hsa-let-7g-5p.iso.t5:0.seed:0.t3:tt.ad:GTT.mm:0	0.222511	-1.17342	1.1353	-1.03358	0.301333		CRC_vs_HC
hsa-let-7g-5p.iso.t5:C.seed:0.t3:0.ad:0.mm:0	44.199	-0.12728	0.116654	-1.09108	0.275236	0.490071	CRC_vs_HC
hsa-let-7g-5p.iso.t5:C.seed:0.t3:0.ad:A.mm:0	1.05462	0.290317	0.408716	0.710314	0.477509	0.683837	CRC_vs_HC
hsa-let-7g-5p.iso.t5:C.seed:0.t3:gtt.ad:0.mm:0	0.804781	-1.43633	0.676397	-2.12351	0.0337112	0.116347	CRC_vs_HC
hsa-let-7g-5p.iso.t5:C.seed:0.t3:t.ad:0.mm:0	9.98134	-0.573322	0.213682	-2.68306	0.00729523	0.0370869	CRC_vs_HC
hsa-let-7g-5p.iso.t5:C.seed:0.t3:T.ad:0.mm:0	1.86082	-0.0135523	0.382776	-0.0354053	0.971757	0.986636	CRC_vs_HC
hsa-let-7g-5p.iso.t5:C.seed:0.t3:t.ad:A.mm:0	0.136122	-0.177757	1.46873	-0.121028	0.903669		CRC_vs_HC
hsa-let-7g-5p.iso.t5:C.seed:0.t3:tt.ad:0.mm:0	0.519183	0.117818	0.59368	0.198454	0.84269	0.918125	CRC_vs_HC
hsa-let-7g-5p.iso.t5:C.seed:0.t3:tt.ad:AT.mm:0	0.00963035	-0.575405	3.81645	-0.15077	0.880157		CRC_vs_HC
hsa-let-7g-5p.iso.t5:C.seed:0.t3:tt.ad:GT.mm:0	0.0157716	-0.968461	3.81637	-0.253765	0.799677		CRC_vs_HC
hsa-let-7g-5p.iso.t5:GC.seed:0.t3:0.ad:0.mm:0	1.64179	-0.665955	0.453215	-1.4694	0.141724	0.32146	CRC_vs_HC
hsa-let-7g-5p.iso.t5:GC.seed:0.t3:t.ad:0.mm:0	0.220648	-0.454021	1.04338	-0.435145	0.663457		CRC_vs_HC
hsa-let-7g-5p.iso.t5:t.seed:0.t3:0.ad:0.mm:0	0.973756	0.162122	0.473147	0.342647	0.731864	0.864064	CRC_vs_HC
hsa-let-7g-5p.iso.t5:t.seed:0.t3:t.ad:0.mm:0	0.162307	-0.727815	1.0071	-0.722681	0.469876		CRC_vs_HC
hsa-let-7g-5p.iso.t5:tga.seed:0.t3:0.ad:0.mm:0	0.785445	-1.02975	0.642349	-1.6031	0.108912	0.267771	CRC_vs_HC
hsa-let-7g-5p.iso.t5:tga.seed:0.t3:t.ad:0.mm:0	0.217831	-1.16125	1.72674	-0.672508	0.501261		CRC_vs_HC
hsa-let-7g-5p.ref.t5:0.seed:0.t3:0.ad:0.mm:0	13317.3	-0.921473	0.13035	-7.06924	1.55787e-12	2.33854e-10	CRC_vs_HC
hsa-let-7i-3p.iso.t5:0.seed:0.t3:0.ad:T.mm:0	0.302636	0.236557	0.845125	0.279907	0.779549		CRC_vs_HC
hsa-let-7i-3p.iso.t5:0.seed:0.t3:ct.ad:0.mm:0	40.3963	-0.882586	0.209237	-4.21811	2.46356e-05	0.000353601	CRC_vs_HC
hsa-let-7i-3p.iso.t5:0.seed:0.t3:ct.ad:A.mm:0	0.989866	-0.785965	0.450368	-1.74516	0.0809564	0.218588	CRC_vs_HC
hsa-let-7i-3p.iso.t5:0.seed:0.t3:ct.ad:T.mm:0	0.769868	-0.721757	0.531937	-1.35685	0.17483	0.369416	CRC_vs_HC
hsa-let-7i-3p.iso.t5:0.seed:0.t3:ct.ad:TT.mm:0	0.989867	0.637585	0.454363	1.40325	0.160542	0.348801	CRC_vs_HC
hsa-let-7i-3p.iso.t5:0.seed:0.t3:gct.ad:0.mm:0	0.750885	-1.28487	0.598601	-2.14645	0.0318373	0.111611	CRC_vs_HC
hsa-let-7i-3p.iso.t5:0.seed:0.t3:t.ad:0.mm:0	10.6681	0.581252	0.215383	2.69868	0.00696142	0.0358241	CRC_vs_HC
hsa-let-7i-3p.iso.t5:0.seed:0.t3:t.ad:A.mm:0	0.960122	0.207698	0.402015	0.516642	0.605406	0.779884	CRC_vs_HC
hsa-let-7i-3p.ref.t5:0.seed:0.t3:0.ad:0.mm:0	22.3583	0.661744	0.233003	2.84006	0.00451044	0.0256168	CRC_vs_HC
hsa-let-7i-5p.iso.t5:0.seed:0.t3:0.ad:A.mm:0	1262.11	0.135278	0.229832	0.588593	0.556134	0.743655	CRC_vs_HC
hsa-let-7i-5p.iso.t5:0.seed:0.t3:0.ad:AA.mm:0	29.7101	-0.15869	0.162801	-0.974748	0.329685	0.548452	CRC_vs_HC
hsa-let-7i-5p.iso.t5:0.seed:0.t3:0.ad:AAA.mm:0	1.57796	0.429581	0.397741	1.08005	0.280119	0.496072	CRC_vs_HC
hsa-let-7i-5p.iso.t5:0.seed:0.t3:0.ad:AAC.mm:0	0.270066	-0.64276	1.28171	-0.501487	0.616028		CRC_vs_HC
hsa-let-7i-5p.iso.t5:0.seed:0.t3:0.ad:AAG.mm:0	0.233685	-0.326106	1.0508	-0.310341	0.756302		CRC_vs_HC
hsa-let-7i-5p.iso.t5:0.seed:0.t3:0.ad:AAT.mm:0	0.864047	-0.29537	0.507754	-0.58172	0.560756	0.747247	CRC_vs_HC
hsa-let-7i-5p.iso.t5:0.seed:0.t3:0.ad:AC.mm:0	1.66663	0.0619016	0.412501	0.150064	0.880714	0.939612	CRC_vs_HC
hsa-let-7i-5p.iso.t5:0.seed:0.t3:0.ad:AG.mm:0	2.73525	-0.256963	0.379023	-0.677961	0.497796	0.70219	CRC_vs_HC
hsa-let-7i-5p.iso.t5:0.seed:0.t3:0.ad:AGA.mm:0	0.545885	-0.468969	0.615159	-0.762354	0.445849	0.655878	CRC_vs_HC
hsa-let-7i-5p.iso.t5:0.seed:0.t3:0.ad:AGT.mm:0	0.283332	-0.749606	1.02073	-0.734379	0.462718		CRC_vs_HC
hsa-let-7i-5p.iso.t5:0.seed:0.t3:0.ad:AT.mm:0	45.5032	-0.239401	0.162807	-1.47046	0.141437	0.321011	CRC_vs_HC
hsa-let-7i-5p.iso.t5:0.seed:0.t3:0.ad:ATA.mm:0	1.00124	1.126	0.531665	2.11787	0.0341863	0.117596	CRC_vs_HC
hsa-let-7i-5p.iso.t5:0.seed:0.t3:0.ad:ATT.mm:0	5.18216	0.492956	0.288772	1.70708	0.0878073	0.231819	CRC_vs_HC
hsa-let-7i-5p.iso.t5:0.seed:0.t3:0.ad:C.mm:0	2.27389	0.652746	0.396741	1.64527	0.0999139	0.252701	CRC_vs_HC
hsa-let-7i-5p.iso.t5:0.seed:0.t3:0.ad:CA.mm:0	0.172524	-0.796509	1.42259	-0.559899	0.575548		CRC_vs_HC
hsa-let-7i-5p.iso.t5:0.seed:0.t3:0.ad:CCT.mm:0	0.0433985	-0.926961	3.81635	-0.242892	0.808089		CRC_vs_HC
hsa-let-7i-5p.iso.t5:0.seed:0.t3:0.ad:CT.mm:0	0.356029	-0.0087259	0.856906	-0.010183	0.991875		CRC_vs_HC
hsa-let-7i-5p.iso.t5:0.seed:0.t3:0.ad:T.mm:0	497.583	0.00142807	0.171862	0.00830943	0.99337	0.99632	CRC_vs_HC
hsa-let-7i-5p.iso.t5:0.seed:0.t3:0.ad:TA.mm:0	3.48503	-0.230462	0.287647	-0.801197	0.423017	0.633507	CRC_vs_HC
hsa-let-7i-5p.iso.t5:0.seed:0.t3:0.ad:TAA.mm:0	0.0754963	-0.627064	2.59798	-0.241366	0.809271		CRC_vs_HC
hsa-let-7i-5p.iso.t5:0.seed:0.t3:0.ad:TAT.mm:0	0.212639	-1.07655	1.3004	-0.827864	0.407748		CRC_vs_HC
hsa-let-7i-5p.iso.t5:0.seed:0.t3:0.ad:TC.mm:0	0.718601	0.982393	0.598481	1.64148	0.100699	0.253813	CRC_vs_HC
hsa-let-7i-5p.iso.t5:0.seed:0.t3:0.ad:TG.mm:0	0.384117	-0.155432	0.733663	-0.211857	0.832218		CRC_vs_HC
hsa-let-7i-5p.iso.t5:0.seed:0.t3:0.ad:TT.mm:0	13.0278	-0.0955853	0.220571	-0.433355	0.664757	0.821108	CRC_vs_HC
hsa-let-7i-5p.iso.t5:0.seed:0.t3:0.ad:TTA.mm:0	0.7464	0.471521	0.784452	0.601084	0.547784	0.737751	CRC_vs_HC
hsa-let-7i-5p.iso.t5:0.seed:0.t3:0.ad:TTT.mm:0	0.920703	0.268185	0.502896	0.533281	0.593839	0.772782	CRC_vs_HC
hsa-let-7i-5p.iso.t5:0.seed:0.t3:G.ad:0.mm:0	27.7624	-0.19502	0.196403	-0.992957	0.320731	0.540062	CRC_vs_HC
hsa-let-7i-5p.iso.t5:0.seed:0.t3:G.ad:A.mm:0	2.72364	-0.217373	0.340711	-0.637997	0.523476	0.721658	CRC_vs_HC
hsa-let-7i-5p.iso.t5:0.seed:0.t3:G.ad:AAA.mm:0	0.0320487	-0.256609	3.81636	-0.067239	0.946391		CRC_vs_HC
hsa-let-7i-5p.iso.t5:0.seed:0.t3:G.ad:ATT.mm:0	0.16188	-1.05535	2.78328	-0.379175	0.704558		CRC_vs_HC
hsa-let-7i-5p.iso.t5:0.seed:0.t3:G.ad:C.mm:0	0.146377	-0.745354	1.58496	-0.470267	0.638165		CRC_vs_HC
hsa-let-7i-5p.iso.t5:0.seed:0.t3:G.ad:T.mm:0	2.80001	-1.17362	0.383099	-3.06349	0.00218775	0.0143827	CRC_vs_HC
hsa-let-7i-5p.iso.t5:0.seed:0.t3:G.ad:TTT.mm:0	0.143028	-0.647276	1.35123	-0.479027	0.631919		CRC_vs_HC
hsa-let-7i-5p.iso.t5:0.seed:0.t3:GGT.ad:0.mm:0	0.0646754	-1.46667	3.05277	-0.480439	0.630915		CRC_vs_HC
hsa-let-7i-5p.iso.t5:0.seed:0.t3:gtt.ad:0.mm:0	92.9788	-0.797341	0.236196	-3.37576	0.000736113	0.00585855	CRC_vs_HC
hsa-let-7i-5p.iso.t5:0.seed:0.t3:gtt.ad:A.mm:0	4.77861	-0.355103	0.30933	-1.14797	0.25098	0.461796	CRC_vs_HC
hsa-let-7i-5p.iso.t5:0.seed:0.t3:gtt.ad:AA.mm:0	1.00663	-2.34014e-05	0.494646	-4.73093e-05	0.999962	1	CRC_vs_HC
hsa-let-7i-5p.iso.t5:0.seed:0.t3:gtt.ad:AAA.mm:0	0.30327	-1.1465	0.987836	-1.16062	0.245797		CRC_vs_HC
hsa-let-7i-5p.iso.t5:0.seed:0.t3:gtt.ad:AT.mm:0	0.249515	-0.951006	1.27286	-0.747144	0.454977		CRC_vs_HC
hsa-let-7i-5p.iso.t5:0.seed:0.t3:gtt.ad:ATT.mm:0	1.34079	0.353548	0.507012	0.697317	0.485605	0.691491	CRC_vs_HC
hsa-let-7i-5p.iso.t5:0.seed:0.t3:gtt.ad:C.mm:0	0.0610913	-0.913976	3.81614	-0.239503	0.810716		CRC_vs_HC
hsa-let-7i-5p.iso.t5:0.seed:0.t3:gtt.ad:CA.mm:0	0.0167065	-0.879214	3.81626	-0.230386	0.817792		CRC_vs_HC
hsa-let-7i-5p.iso.t5:0.seed:0.t3:gtt.ad:CT.mm:0	0.141137	-1.44835	1.6252	-0.891181	0.372832		CRC_vs_HC
hsa-let-7i-5p.iso.t5:0.seed:0.t3:gtt.ad:CTT.mm:0	1.88753	-2.42818	0.55838	-4.34862	1.36998e-05	0.000215214	CRC_vs_HC
hsa-let-7i-5p.iso.t5:0.seed:0.t3:gtt.ad:T.mm:0	2.05645	0.349821	0.36216	0.965928	0.33408	0.551174	CRC_vs_HC
hsa-let-7i-5p.iso.t5:0.seed:0.t3:gtt.ad:TT.mm:0	0.646418	-1.22728	0.765964	-1.60227	0.109097	0.268103	CRC_vs_HC
hsa-let-7i-5p.iso.t5:0.seed:0.t3:gtt.ad:TTT.mm:0	2.9146	-0.369291	0.437933	-0.843259	0.399084	0.612854	CRC_vs_HC
hsa-let-7i-5p.iso.t5:0.seed:0.t3:t.ad:0.mm:0	751.164	-0.289406	0.213522	-1.35539	0.175294	0.370031	CRC_vs_HC
hsa-let-7i-5p.iso.t5:0.seed:0.t3:t.ad:A.mm:0	44.2141	-0.331867	0.190227	-1.74458	0.0810578	0.218745	CRC_vs_HC
hsa-let-7i-5p.iso.t5:0.seed:0.t3:t.ad:AA.mm:0	29.4001	-0.524415	0.198227	-2.64553	0.00815628	0.0404001	CRC_vs_HC
hsa-let-7i-5p.iso.t5:0.seed:0.t3:t.ad:AAA.mm:0	1.26007	-0.428189	0.465102	-0.920636	0.35724	0.57304	CRC_vs_HC
hsa-let-7i-5p.iso.t5:0.seed:0.t3:t.ad:AAG.mm:0	0.129012	-1.09376	1.4568	-0.750798	0.452774		CRC_vs_HC
hsa-let-7i-5p.iso.t5:0.seed:0.t3:t.ad:AAT.mm:0	0.685984	-0.745873	0.559529	-1.33304	0.182519	0.379213	CRC_vs_HC
hsa-let-7i-5p.iso.t5:0.seed:0.t3:t.ad:AC.mm:0	0.303015	-0.914835	1.15298	-0.793452	0.427515		CRC_vs_HC
hsa-let-7i-5p.iso.t5:0.seed:0.t3:t.ad:AG.mm:0	2.74884	-0.70274	0.317708	-2.2119	0.0269734	0.098423	CRC_vs_HC
hsa-let-7i-5p.iso.t5:0.seed:0.t3:t.ad:AGA.mm:0	0.475758	-0.404077	0.636068	-0.635274	0.52525	0.722987	CRC_vs_HC
hsa-let-7i-5p.iso.t5:0.seed:0.t3:t.ad:AGT.mm:0	0.0773394	-1.07763	2.58385	-0.417065	0.676631		CRC_vs_HC
hsa-let-7i-5p.iso.t5:0.seed:0.t3:t.ad:AT.mm:0	9.85042	-1.05709	0.268622	-3.93522	8.31207e-05	0.000972904	CRC_vs_HC
hsa-let-7i-5p.iso.t5:0.seed:0.t3:t.ad:ATA.mm:0	0.136309	-0.875901	2.83409	-0.309059	0.757276		CRC_vs_HC
hsa-let-7i-5p.iso.t5:0.seed:0.t3:t.ad:ATT.mm:0	0.246922	-0.789098	0.92701	-0.851229	0.394642		CRC_vs_HC
hsa-let-7i-5p.iso.t5:0.seed:0.t3:t.ad:C.mm:0	0.95792	1.0354	0.506939	2.04245	0.0411068	0.134507	CRC_vs_HC
hsa-let-7i-5p.iso.t5:0.seed:0.t3:t.ad:CA.mm:0	0.787388	0.0974415	0.615441	0.158328	0.874198	0.936366	CRC_vs_HC
hsa-let-7i-5p.iso.t5:0.seed:0.t3:t.ad:CT.mm:0	0.093937	0.101662	1.78741	0.0568769	0.954643		CRC_vs_HC
hsa-let-7i-5p.iso.t5:0.seed:0.t3:t.ad:G.mm:0	4.78671	-0.088947	0.357454	-0.248835	0.803488	0.903371	CRC_vs_HC
hsa-let-7i-5p.iso.t5:0.seed:0.t3:t.ad:GA.mm:0	0.973203	-0.312061	0.574357	-0.543322	0.586908	0.767188	CRC_vs_HC
hsa-let-7i-5p.iso.t5:0.seed:0.t3:t.ad:GT.mm:0	0.387851	-0.670688	0.802961	-0.835268	0.403567		CRC_vs_HC
hsa-let-7i-5p.iso.t5:0.seed:0.t3:tt.ad:0.mm:0	184.874	-0.538711	0.226398	-2.37949	0.0173366	0.0712721	CRC_vs_HC
hsa-let-7i-5p.iso.t5:0.seed:0.t3:tt.ad:A.mm:0	12.1158	-0.651667	0.258795	-2.51808	0.0117997	0.053517	CRC_vs_HC
hsa-let-7i-5p.iso.t5:0.seed:0.t3:tt.ad:AA.mm:0	3.01053	-0.788144	0.367376	-2.14534	0.031926	0.111886	CRC_vs_HC
hsa-let-7i-5p.iso.t5:0.seed:0.t3:tt.ad:AAA.mm:0	2.15644	-1.57324	0.361653	-4.35015	1.36041e-05	0.000214023	CRC_vs_HC
hsa-let-7i-5p.iso.t5:0.seed:0.t3:tt.ad:AAG.mm:0	0.368092	-1.14019	0.820431	-1.38974	0.164608		CRC_vs_HC
hsa-let-7i-5p.iso.t5:0.seed:0.t3:tt.ad:AAT.mm:0	0.395978	-0.880995	0.760852	-1.1579	0.246903		CRC_vs_HC
hsa-let-7i-5p.iso.t5:0.seed:0.t3:tt.ad:AG.mm:0	0.273426	-1.42301	1.02216	-1.39215	0.163876		CRC_vs_HC
hsa-let-7i-5p.iso.t5:0.seed:0.t3:tt.ad:AGA.mm:0	0.278048	-0.555945	0.831048	-0.668968	0.503516		CRC_vs_HC
hsa-let-7i-5p.iso.t5:0.seed:0.t3:tt.ad:AT.mm:0	1.52427	0.810537	0.381103	2.12682	0.033435	0.11572	CRC_vs_HC
hsa-let-7i-5p.iso.t5:0.seed:0.t3:tt.ad:ATA.mm:0	0.359576	0.798826	0.726629	1.09936	0.271612		CRC_vs_HC
hsa-let-7i-5p.iso.t5:0.seed:0.t3:tt.ad:ATT.mm:0	0.240145	-0.7762	0.82288	-0.943272	0.345542		CRC_vs_HC
hsa-let-7i-5p.iso.t5:0.seed:0.t3:tt.ad:C.mm:0	1.11128	-0.116609	0.480126	-0.242871	0.808105	0.903973	CRC_vs_HC
hsa-let-7i-5p.iso.t5:0.seed:0.t3:tt.ad:CT.mm:0	1.76696	-0.583814	0.396966	-1.47069	0.141375	0.321005	CRC_vs_HC
hsa-let-7i-5p.iso.t5:0.seed:0.t3:tt.ad:CTA.mm:0	0.199711	-1.09206	0.998768	-1.09341	0.274216		CRC_vs_HC
hsa-let-7i-5p.iso.t5:0.seed:0.t3:tt.ad:CTT.mm:0	0.228213	-0.45659	1.15304	-0.395987	0.692115		CRC_vs_HC
hsa-let-7i-5p.iso.t5:0.seed:0.t3:tt.ad:GT.mm:0	1.02659	-0.852937	0.481579	-1.77112	0.0765401	0.210441	CRC_vs_HC
hsa-let-7i-5p.iso.t5:0.seed:0.t3:tt.ad:GTA.mm:0	0.183361	-0.606578	0.980768	-0.618473	0.536264		CRC_vs_HC
hsa-let-7i-5p.iso.t5:0.seed:0.t3:tt.ad:GTT.mm:0	0.138728	-1.10248	2.842	-0.387925	0.698072		CRC_vs_HC
hsa-let-7i-5p.iso.t5:C.seed:0.t3:0.ad:0.mm:0	1.45525	0.801964	0.366852	2.18607	0.0288106	0.103416	CRC_vs_HC
hsa-let-7i-5p.iso.t5:C.seed:0.t3:0.ad:A.mm:0	0.298957	0.563607	0.781654	0.721044	0.470883		CRC_vs_HC
hsa-let-7i-5p.iso.t5:C.seed:0.t3:t.ad:0.mm:0	0.142864	-0.674537	1.59898	-0.421854	0.673132		CRC_vs_HC
hsa-let-7i-5p.iso.t5:GC.seed:0.t3:0.ad:0.mm:0	0.282712	-0.729281	0.964683	-0.75598	0.449661		CRC_vs_HC
hsa-let-7i-5p.iso.t5:t.seed:0.t3:0.ad:0.mm:0	0.549229	-0.51205	0.691895	-0.740069	0.459258	0.667518	CRC_vs_HC
hsa-let-7i-5p.iso.t5:t.seed:0.t3:0.ad:A.mm:0	0.135546	-0.595197	1.77021	-0.336229	0.736698		CRC_vs_HC
hsa-let-7i-5p.iso.t5:t.seed:0.t3:t.ad:0.mm:0	0.0768692	-1.14398	3.54557	-0.322652	0.746959		CRC_vs_HC
hsa-let-7i-5p.iso.t5:tga.seed:0.t3:0.ad:0.mm:0	1.12563	-0.25475	0.735602	-0.346315	0.729106	0.862303	CRC_vs_HC
hsa-let-7i-5p.iso.t5:tga.seed:0.t3:0.ad:A.mm:0	0.109508	-0.990733	3.81642	-0.259598	0.795174		CRC_vs_HC
hsa-let-7i-5p.iso.t5:tga.seed:0.t3:t.ad:0.mm:0	0.0839427	-1.1894	2.58994	-0.459239	0.646062		CRC_vs_HC
hsa-let-7i-5p.ref.t5:0.seed:0.t3:0.ad:0.mm:0	5851.27	0.059305	0.203072	0.29204	0.770256	0.884784	CRC_vs_HC
hsa-miR-1-3p.iso.t5:0.seed:0.t3:0.ad:A.mm:0	0.901808	1.06945	0.919191	1.16347	0.24464	0.454308	CRC_vs_HC
hsa-miR-1-3p.iso.t5:0.seed:0.t3:0.ad:G.mm:0	0.0458276	-0.56062	3.81615	-0.146907	0.883205		CRC_vs_HC
hsa-miR-1-3p.iso.t5:0.seed:0.t3:at.ad:0.mm:0	6.03588	0.859621	0.500123	1.71882	0.0856474	0.228055	CRC_vs_HC
hsa-miR-1-3p.iso.t5:0.seed:0.t3:at.ad:CT.mm:0	0.0419672	-0.537738	3.81636	-0.140903	0.887946		CRC_vs_HC
hsa-miR-1-3p.iso.t5:0.seed:0.t3:at.ad:GT.mm:0	0.0299489	-0.481447	3.81643	-0.126151	0.899612		CRC_vs_HC
hsa-miR-1-3p.iso.t5:0.seed:0.t3:at.ad:T.mm:0	0.1785	0.0554004	1.54969	0.0357494	0.971482		CRC_vs_HC
hsa-miR-1-3p.iso.t5:0.seed:0.t3:at.ad:TT.mm:0	0.396028	0.482653	1.13569	0.424986	0.670847		CRC_vs_HC
hsa-miR-1-3p.iso.t5:0.seed:0.t3:C.ad:0.mm:0	0.0325583	-0.478654	3.81629	-0.125424	0.900188		CRC_vs_HC
hsa-miR-1-3p.iso.t5:0.seed:0.t3:t.ad:0.mm:0	4.31813	0.984772	0.539927	1.8239	0.0681673	0.193373	CRC_vs_HC
hsa-miR-1-3p.iso.t5:0.seed:0.t3:T.ad:0.mm:0	4.57781	1.38206	0.634038	2.17977			CRC_vs_HC
hsa-miR-1-3p.iso.t5:0.seed:0.t3:t.ad:A.mm:0	2.9785	1.73132	0.595978	2.905	0.00367251	0.0216426	CRC_vs_HC
hsa-miR-1-3p.iso.t5:0.seed:0.t3:t.ad:AA.mm:0	0.258147	1.25266	2.06301	0.607202	0.543717		CRC_vs_HC
hsa-miR-1-3p.iso.t5:0.seed:0.t3:t.ad:AT.mm:0	0.0360876	-0.276575	3.81611	-0.0724757	0.942223		CRC_vs_HC
hsa-miR-1-3p.iso.t5:0.seed:0.t3:t.ad:C.mm:0	0.97101	1.75274	0.904714	1.93734	0.0527039	0.160827	CRC_vs_HC
hsa-miR-1-3p.iso.t5:0.seed:0.t3:t.ad:CA.mm:0	0.0719881	0.154247	3.81451	0.040437	0.967745		CRC_vs_HC
hsa-miR-1-3p.iso.t5:0.seed:0.t3:t.ad:CC.mm:0	0.104789	0.695997	3.81148	0.182606	0.855108		CRC_vs_HC
hsa-miR-1-3p.iso.t5:0.seed:0.t3:t.ad:CT.mm:0	0.0926507	0.29946	3.8133	0.0785304	0.937406		CRC_vs_HC
hsa-miR-1-3p.iso.t5:0.seed:0.t3:t.ad:G.mm:0	0.0752862	-0.34133	3.02375	-0.112883	0.910123		CRC_vs_HC
hsa-miR-1-3p.iso.t5:0.seed:0.t3:t.ad:GT.mm:0	0.00963035	-0.575405	3.81645	-0.15077	0.880157		CRC_vs_HC
hsa-miR-1-3p.iso.t5:0.seed:0.t3:tat.ad:0.mm:0	0.322389	0.343298	1.06566	0.322145	0.747343		CRC_vs_HC
hsa-miR-1-3p.iso.t5:0.seed:0.t3:tat.ad:A.mm:0	0.0404965	-0.267267	3.81573	-0.0700435	0.944159		CRC_vs_HC
hsa-miR-1-3p.iso.t5:0.seed:0.t3:tat.ad:AAA.mm:0	0.012381	-0.674921	3.81647	-0.176844	0.859631		CRC_vs_HC
hsa-miR-1-3p.iso.t5:0.seed:0.t3:TT.ad:0.mm:0	0.0447996	-0.0583149	3.81563	-0.0152832	0.987806		CRC_vs_HC
hsa-miR-1-3p.iso.t5:t.seed:0.t3:0.ad:0.mm:0	0.0192607	-0.251738	3.81637	-0.0659627	0.947408		CRC_vs_HC
hsa-miR-1-3p.iso.t5:tg.seed:0.t3:T.ad:0.mm:0	0.136312	0.520274	2.24663	0.23158	0.816864		CRC_vs_HC
hsa-miR-1-3p.iso.t5:tg.seed:0.t3:t.ad:CTT.mm:0	0.0191522	-0.608948	3.81642	-0.15956	0.873228		CRC_vs_HC
hsa-miR-1-3p.iso.t5:tg.seed:0.t3:TT.ad:0.mm:0	0.135869	0.218827	2.26477	0.096622	0.923027		CRC_vs_HC
hsa-miR-1-3p.iso.t5:tgg.seed:0.t3:0.ad:0.mm:0	0.24699	-1.4812	1.31643	-1.12516	0.26052		CRC_vs_HC
hsa-miR-1-3p.ref.t5:0.seed:0.t3:0.ad:0.mm:0	73.3246	0.672301	0.486254	1.38261	0.166784	0.357233	CRC_vs_HC
hsa-miR-1-5p.iso.t5:0.seed:0.t3:A.ad:0.mm:0	0.0577704	-0.15158	3.6988	-0.0409808	0.967311		CRC_vs_HC
hsa-miR-1-5p.ref.t5:0.seed:0.t3:0.ad:0.mm:0	0.0509492	-0.190778	3.7409	-0.0509979	0.959327		CRC_vs_HC
hsa-miR-100-3p.iso.t5:0.seed:0.t3:0.ad:A.mm:0	0.0244304	-0.594237	3.8164	-0.155706	0.876265		CRC_vs_HC
hsa-miR-100-3p.iso.t5:0.seed:0.t3:atg.ad:CTG.mm:0	0.0164763	-0.86503	3.81626	-0.22667	0.820681		CRC_vs_HC
hsa-miR-100-3p.iso.t5:0.seed:0.t3:g.ad:0.mm:0	0.257243	-0.573236	0.927599	-0.617978	0.53659		CRC_vs_HC
hsa-miR-100-3p.iso.t5:0.seed:0.t3:T.ad:0.mm:0	0.0683501	-0.688261	3.05526	-0.225271	0.821769		CRC_vs_HC
hsa-miR-100-3p.iso.t5:A.seed:0.t3:0.ad:0.mm:0	0.0946125	0.24302	2.57593	0.0943426	0.924837		CRC_vs_HC
hsa-miR-100-3p.ref.t5:0.seed:0.t3:0.ad:0.mm:0	7.21819	1.41026	0.351617	4.01078	6.05173e-05	0.000759665	CRC_vs_HC
hsa-miR-100-5p.iso.t5:0.seed:0.t3:0.ad:A.mm:0	210.519	-0.242223	0.343776	-0.704595	0.481063	0.687378	CRC_vs_HC
hsa-miR-100-5p.iso.t5:0.seed:0.t3:0.ad:AA.mm:0	20.8127	0.296596	0.282142	1.05123	0.293152	0.511278	CRC_vs_HC
hsa-miR-100-5p.iso.t5:0.seed:0.t3:0.ad:AAA.mm:0	0.48037	0.247436	0.662568	0.37345	0.708814	0.849602	CRC_vs_HC
hsa-miR-100-5p.iso.t5:0.seed:0.t3:0.ad:AC.mm:0	0.147852	-0.744541	1.59867	-0.465726	0.641412		CRC_vs_HC
hsa-miR-100-5p.iso.t5:0.seed:0.t3:0.ad:AG.mm:0	0.360317	-0.759938	0.789855	-0.962123	0.335988		CRC_vs_HC
hsa-miR-100-5p.iso.t5:0.seed:0.t3:0.ad:C.mm:0	0.111484	-0.0396311	1.64242	-0.0241297	0.980749		CRC_vs_HC
hsa-miR-100-5p.iso.t5:0.seed:0.t3:0.ad:T.mm:0	8.30501	-0.472556	0.412378	-1.14593	0.251825	0.4628	CRC_vs_HC
hsa-miR-100-5p.iso.t5:0.seed:0.t3:0.ad:TG.mm:0	0.107243	0.160444	1.98299	0.0809101	0.935513		CRC_vs_HC
hsa-miR-100-5p.iso.t5:0.seed:0.t3:g.ad:0.mm:0	317.705	-0.136047	0.34099	-0.398977	0.68991	0.837438	CRC_vs_HC
hsa-miR-100-5p.iso.t5:0.seed:0.t3:g.ad:A.mm:0	5.82664	-0.34956	0.337366	-1.03615	0.300134	0.519694	CRC_vs_HC
hsa-miR-100-5p.iso.t5:0.seed:0.t3:g.ad:AA.mm:0	2.76676	-0.883733	0.401981	-2.19844	0.0279175	0.101253	CRC_vs_HC
hsa-miR-100-5p.iso.t5:0.seed:0.t3:g.ad:AAA.mm:0	0.135585	-1.29428	1.4688	-0.881179	0.378221		CRC_vs_HC
hsa-miR-100-5p.iso.t5:0.seed:0.t3:g.ad:AG.mm:0	0.0996974	-1.03293	2.25826	-0.457401	0.647383		CRC_vs_HC
hsa-miR-100-5p.iso.t5:0.seed:0.t3:g.ad:AT.mm:0	0.0774647	-1.21848	2.59569	-0.469424	0.638766		CRC_vs_HC
hsa-miR-100-5p.iso.t5:0.seed:0.t3:g.ad:T.mm:0	0.601454	-1.93334	0.80919	-2.38923	0.0168835	0.0700811	CRC_vs_HC
hsa-miR-100-5p.iso.t5:0.seed:0.t3:g.ad:TA.mm:0	0.328361	-1.92687	1.07609	-1.79062	0.0733537		CRC_vs_HC
hsa-miR-100-5p.iso.t5:0.seed:0.t3:g.ad:TAA.mm:0	0.0581243	-1.13651	3.6815	-0.308708	0.757544		CRC_vs_HC
hsa-miR-100-5p.iso.t5:0.seed:0.t3:g.ad:TT.mm:0	0.0190437	-0.968461	3.81637	-0.253765	0.799677		CRC_vs_HC
hsa-miR-100-5p.iso.t5:0.seed:0.t3:GT.ad:0.mm:0	0.30677	0.22511	0.835576	0.269408	0.787616		CRC_vs_HC
hsa-miR-100-5p.iso.t5:0.seed:0.t3:gtg.ad:0.mm:0	14.1953	-0.589662	0.37083	-1.59011	0.111809	0.273339	CRC_vs_HC
hsa-miR-100-5p.iso.t5:0.seed:0.t3:gtg.ad:A.mm:0	0.149533	-1.2373	1.475	-0.838846	0.401556		CRC_vs_HC
hsa-miR-100-5p.iso.t5:0.seed:0.t3:gtg.ad:AT.mm:0	0.0387688	-0.577926	3.81622	-0.151439	0.879629		CRC_vs_HC
hsa-miR-100-5p.iso.t5:0.seed:0.t3:gtg.ad:ATG.mm:0	0.107789	-0.356603	1.80187	-0.197908	0.843117		CRC_vs_HC
hsa-miR-100-5p.iso.t5:0.seed:0.t3:gtg.ad:CTG.mm:0	0.0893188	-0.915699	2.98258	-0.307015	0.758832		CRC_vs_HC
hsa-miR-100-5p.iso.t5:0.seed:0.t3:gtg.ad:TTG.mm:0	0.162869	-0.0391268	1.59942	-0.0244631	0.980483		CRC_vs_HC
hsa-miR-100-5p.iso.t5:0.seed:0.t3:tg.ad:0.mm:0	235.913	0.437792	0.268185	1.63243	0.102589	0.25702	CRC_vs_HC
hsa-miR-100-5p.iso.t5:0.seed:0.t3:tg.ad:A.mm:0	1.51173	-0.405032	0.58006	-0.69826	0.485015	0.691223	CRC_vs_HC
hsa-miR-100-5p.iso.t5:0.seed:0.t3:tg.ad:AA.mm:0	0.369538	-0.567735	0.800431	-0.709287	0.478146		CRC_vs_HC
hsa-miR-100-5p.iso.t5:0.seed:0.t3:tg.ad:AG.mm:0	0.166478	-0.358182	1.37385	-0.260714	0.794313		CRC_vs_HC
hsa-miR-100-5p.iso.t5:0.seed:0.t3:tg.ad:C.mm:0	0.393703	-1.45715	0.941355	-1.54793	0.121638		CRC_vs_HC
hsa-miR-100-5p.iso.t5:0.seed:0.t3:tg.ad:CG.mm:0	0.431547	-0.0816397	0.67074	-0.121716	0.903124	0.952097	CRC_vs_HC
hsa-miR-100-5p.iso.t5:0.seed:0.t3:tg.ad:CGA.mm:0	0.163722	-0.884357	1.33426	-0.662808	0.507453		CRC_vs_HC
hsa-miR-100-5p.iso.t5:0.seed:0.t3:tg.ad:CGG.mm:0	0.041183	-1.07735	3.81641	-0.282294	0.777718		CRC_vs_HC
hsa-miR-100-5p.iso.t5:0.seed:0.t3:tg.ad:GG.mm:0	0.443722	-0.288729	0.769278	-0.375325	0.707419	0.848833	CRC_vs_HC
hsa-miR-100-5p.iso.t5:a.seed:0.t3:0.ad:0.mm:0	0.614054	-0.825418	0.618498	-1.33455	0.182023	0.378607	CRC_vs_HC
hsa-miR-100-5p.iso.t5:A.seed:0.t3:0.ad:0.mm:0	0.138334	-0.307564	1.98778	-0.154727	0.877036		CRC_vs_HC
hsa-miR-100-5p.iso.t5:a.seed:0.t3:0.ad:A.mm:0	0.179026	-0.322264	1.16943	-0.275573	0.782876		CRC_vs_HC
hsa-miR-100-5p.iso.t5:a.seed:0.t3:0.ad:AA.mm:0	0.105203	-0.688254	1.80867	-0.380529	0.703552		CRC_vs_HC
hsa-miR-100-5p.iso.t5:a.seed:0.t3:g.ad:0.mm:0	0.132557	-0.48402	1.35432	-0.357389	0.720801		CRC_vs_HC
hsa-miR-100-5p.iso.t5:A.seed:0.t3:g.ad:0.mm:0	0.0876649	-0.627472	2.97182	-0.211141	0.832777		CRC_vs_HC
hsa-miR-100-5p.iso.t5:A.seed:0.t3:gtg.ad:0.mm:0	0.0197977	-0.456126	3.81645	-0.119516	0.904867		CRC_vs_HC
hsa-miR-100-5p.iso.t5:a.seed:0.t3:tg.ad:0.mm:0	1.89571	0.911758	0.388595	2.34629	0.0189612	0.0762683	CRC_vs_HC
hsa-miR-100-5p.iso.t5:A.seed:0.t3:tg.ad:0.mm:0	0.115815	-0.765392	2.20081	-0.347778	0.728007		CRC_vs_HC
hsa-miR-100-5p.iso.t5:aa.seed:0.t3:0.ad:0.mm:0	0.0319865	-0.416858	3.81645	-0.109227	0.913023		CRC_vs_HC
hsa-miR-100-5p.iso.t5:aac.seed:0.t3:0.ad:0.mm:0	0.642268	1.12237	0.507821	2.21016	0.027094	0.098763	CRC_vs_HC
hsa-miR-100-5p.iso.t5:aac.seed:0.t3:0.ad:A.mm:0	0.603328	0.295206	0.610353	0.483665	0.628624	0.795961	CRC_vs_HC
hsa-miR-100-5p.iso.t5:aac.seed:0.t3:g.ad:0.mm:0	1.07793	-0.258967	0.486709	-0.532078	0.594672	0.773082	CRC_vs_HC
hsa-miR-100-5p.ref.t5:0.seed:0.t3:0.ad:0.mm:0	559.259	0.491386	0.295069	1.66533	0.0958476	0.246706	CRC_vs_HC
hsa-miR-101-3p.iso.t5:0.seed:0.t3:0.ad:A.mm:0	501.592	-0.372576	0.188453	-1.97703	0.0480381	0.15114	CRC_vs_HC
hsa-miR-101-3p.iso.t5:0.seed:0.t3:0.ad:AA.mm:0	22.4289	-0.323975	0.236471	-1.37004	0.170674	0.36319	CRC_vs_HC
hsa-miR-101-3p.iso.t5:0.seed:0.t3:0.ad:AAA.mm:0	0.937724	0.0117948	0.508896	0.0231771	0.981509	0.991679	CRC_vs_HC
hsa-miR-101-3p.iso.t5:0.seed:0.t3:0.ad:AAC.mm:0	0.0368078	-0.777635	3.8164	-0.203761	0.83854		CRC_vs_HC
hsa-miR-101-3p.iso.t5:0.seed:0.t3:0.ad:AC.mm:0	0.277147	0.479434	0.765244	0.626511	0.53098		CRC_vs_HC
hsa-miR-101-3p.iso.t5:0.seed:0.t3:0.ad:ACT.mm:0	0.069599	-0.776899	3.59346	-0.216198	0.828833		CRC_vs_HC
hsa-miR-101-3p.iso.t5:0.seed:0.t3:0.ad:AG.mm:0	0.539509	0.0904339	0.582814	0.155168	0.876689	0.937522	CRC_vs_HC
hsa-miR-101-3p.iso.t5:0.seed:0.t3:0.ad:AT.mm:0	3.46743	0.27877	0.273363	1.01978	0.307833	0.527937	CRC_vs_HC
hsa-miR-101-3p.iso.t5:0.seed:0.t3:0.ad:ATT.mm:0	0.0398202	-0.938717	3.81604	-0.245993	0.805688		CRC_vs_HC
hsa-miR-101-3p.iso.t5:0.seed:0.t3:0.ad:C.mm:0	45.6082	0.0982593	0.203108	0.483779	0.628543	0.795961	CRC_vs_HC
hsa-miR-101-3p.iso.t5:0.seed:0.t3:0.ad:CA.mm:0	0.308902	-1.13837	0.749362	-1.51911	0.128734		CRC_vs_HC
hsa-miR-101-3p.iso.t5:0.seed:0.t3:0.ad:CC.mm:0	0.054274	-0.413153	3.1166	-0.132565	0.894537		CRC_vs_HC
hsa-miR-101-3p.iso.t5:0.seed:0.t3:0.ad:CCA.mm:0	0.333025	-0.443766	0.803073	-0.552585	0.580547		CRC_vs_HC
hsa-miR-101-3p.iso.t5:0.seed:0.t3:0.ad:CT.mm:0	5.49905	0.0174496	0.2413	0.0723148	0.942351	0.970826	CRC_vs_HC
hsa-miR-101-3p.iso.t5:0.seed:0.t3:0.ad:T.mm:0	1509.14	-0.424004	0.193913	-2.18657	0.0287742	0.103416	CRC_vs_HC
hsa-miR-101-3p.iso.t5:0.seed:0.t3:0.ad:TA.mm:0	2.98582	-0.874717	0.398606	-2.19444	0.0282038	0.102119	CRC_vs_HC
hsa-miR-101-3p.iso.t5:0.seed:0.t3:0.ad:TAA.mm:0	0.209401	-0.451941	1.42367	-0.317448	0.750904		CRC_vs_HC
hsa-miR-101-3p.iso.t5:0.seed:0.t3:0.ad:TC.mm:0	0.119911	-0.428892	1.78301	-0.240544	0.809909		CRC_vs_HC
hsa-miR-101-3p.iso.t5:0.seed:0.t3:0.ad:TG.mm:0	0.246682	-0.579468	0.958319	-0.604671	0.545398		CRC_vs_HC
hsa-miR-101-3p.iso.t5:0.seed:0.t3:0.ad:TT.mm:0	21.1182	-0.216588	0.190785	-1.13525	0.256273	0.467555	CRC_vs_HC
hsa-miR-101-3p.iso.t5:0.seed:0.t3:0.ad:TTA.mm:0	0.0820325	-0.22977	2.58871	-0.0887587	0.929274		CRC_vs_HC
hsa-miR-101-3p.iso.t5:0.seed:0.t3:0.ad:TTT.mm:0	0.152589	-0.962507	2.0018	-0.48082	0.630645		CRC_vs_HC
hsa-miR-101-3p.iso.t5:0.seed:0.t3:a.ad:0.mm:0	672.331	-0.638679	0.182524	-3.49914	0.000466754	0.00403897	CRC_vs_HC
hsa-miR-101-3p.iso.t5:0.seed:0.t3:a.ad:C.mm:0	167.302	-0.532416	0.195301	-2.72613	0.00640811	0.0336535	CRC_vs_HC
hsa-miR-101-3p.iso.t5:0.seed:0.t3:a.ad:CA.mm:0	18.7387	-0.81843	0.23912	-3.42268	0.000620065	0.00509971	CRC_vs_HC
hsa-miR-101-3p.iso.t5:0.seed:0.t3:a.ad:CC.mm:0	288.141	0.0595183	0.25044	0.237655	0.812149	0.903973	CRC_vs_HC
hsa-miR-101-3p.iso.t5:0.seed:0.t3:a.ad:CCA.mm:0	0.134719	-0.484127	1.79843	-0.269195	0.78778		CRC_vs_HC
hsa-miR-101-3p.iso.t5:0.seed:0.t3:a.ad:CCC.mm:0	0.0915619	-0.605529	3.47709	-0.174148	0.861749		CRC_vs_HC
hsa-miR-101-3p.iso.t5:0.seed:0.t3:a.ad:CCT.mm:0	2.83493	0.138779	0.357863	0.387799	0.698165	0.842876	CRC_vs_HC
hsa-miR-101-3p.iso.t5:0.seed:0.t3:a.ad:CG.mm:0	5.23456	-0.175017	0.375677	-0.46587	0.641308	0.805305	CRC_vs_HC
hsa-miR-101-3p.iso.t5:0.seed:0.t3:a.ad:CGA.mm:0	0.262546	-0.159646	1.45189	-0.109958	0.912443		CRC_vs_HC
hsa-miR-101-3p.iso.t5:0.seed:0.t3:a.ad:CGT.mm:0	0.26963	-1.10088	1.22867	-0.89599	0.370258		CRC_vs_HC
hsa-miR-101-3p.iso.t5:0.seed:0.t3:a.ad:CT.mm:0	2905.71	-0.701996	0.230396	-3.0469	0.00231212	0.0150539	CRC_vs_HC
hsa-miR-101-3p.iso.t5:0.seed:0.t3:a.ad:CTT.mm:0	0.285914	-0.679381	0.748623	-0.907507	0.364138		CRC_vs_HC
hsa-miR-101-3p.iso.t5:0.seed:0.t3:a.ad:G.mm:0	1.35302	-0.611267	0.416943	-1.46607	0.14263	0.322768	CRC_vs_HC
hsa-miR-101-3p.iso.t5:0.seed:0.t3:a.ad:GA.mm:0	1.7499	-1.20762	0.411452	-2.93503	0.00333513	0.020059	CRC_vs_HC
hsa-miR-101-3p.iso.t5:0.seed:0.t3:a.ad:GAA.mm:0	0.170707	-1.27102	1.56181	-0.813813	0.415752		CRC_vs_HC
hsa-miR-101-3p.iso.t5:0.seed:0.t3:a.ad:GG.mm:0	0.403197	-0.923764	0.746425	-1.23758	0.21587		CRC_vs_HC
hsa-miR-101-3p.iso.t5:0.seed:0.t3:a.ad:GGA.mm:0	0.0658923	-0.879473	3.05467	-0.287911	0.773415		CRC_vs_HC
hsa-miR-101-3p.iso.t5:0.seed:0.t3:a.ad:GT.mm:0	1.39633	-1.45759	0.501341	-2.90739	0.00364457	0.0215484	CRC_vs_HC
hsa-miR-101-3p.iso.t5:0.seed:0.t3:a.ad:T.mm:0	120.911	-0.865868	0.16282	-5.31795	1.04941e-07	3.35564e-06	CRC_vs_HC
hsa-miR-101-3p.iso.t5:0.seed:0.t3:a.ad:TA.mm:0	4.67803	-0.121718	0.286601	-0.424693	0.67106	0.825215	CRC_vs_HC
hsa-miR-101-3p.iso.t5:0.seed:0.t3:a.ad:TAA.mm:0	0.159324	-0.371015	1.58762	-0.233693	0.815224		CRC_vs_HC
hsa-miR-101-3p.iso.t5:0.seed:0.t3:a.ad:TAC.mm:0	0.0493856	-0.952707	3.75146	-0.253956	0.799529		CRC_vs_HC
hsa-miR-101-3p.iso.t5:0.seed:0.t3:a.ad:TC.mm:0	0.458479	0.797005	0.662292	1.2034	0.22882	0.435863	CRC_vs_HC
hsa-miR-101-3p.iso.t5:0.seed:0.t3:a.ad:TG.mm:0	0.189732	-0.389315	1.07795	-0.361162	0.717978		CRC_vs_HC
hsa-miR-101-3p.iso.t5:0.seed:0.t3:a.ad:TT.mm:0	87.1637	-0.610808	0.179407	-3.4046	0.000662621	0.0053645	CRC_vs_HC
hsa-miR-101-3p.iso.t5:0.seed:0.t3:a.ad:TTA.mm:0	0.247184	-0.367937	0.84867	-0.433545	0.664619		CRC_vs_HC
hsa-miR-101-3p.iso.t5:0.seed:0.t3:a.ad:TTT.mm:0	0.151625	-1.41881	1.45422	-0.975655	0.329235		CRC_vs_HC
hsa-miR-101-3p.iso.t5:0.seed:0.t3:aa.ad:0.mm:0	233.658	-0.466538	0.190347	-2.45099	0.0142465	0.0614881	CRC_vs_HC
hsa-miR-101-3p.iso.t5:0.seed:0.t3:aa.ad:C.mm:0	10.8921	-3.79817	0.783267	-4.84914	1.24e-06	2.73508e-05	CRC_vs_HC
hsa-miR-101-3p.iso.t5:0.seed:0.t3:aa.ad:CA.mm:0	17.0812	-2.35517	0.734572	-3.20618	0.00134509	0.00967175	CRC_vs_HC
hsa-miR-101-3p.iso.t5:0.seed:0.t3:aa.ad:CAA.mm:0	7.02333	-1.76664	0.768068	-2.30011	0.0214421	0.0833921	CRC_vs_HC
hsa-miR-101-3p.iso.t5:0.seed:0.t3:aa.ad:CAC.mm:0	0.762177	-1.00857	1.35314	-0.745354	0.456058	0.664978	CRC_vs_HC
hsa-miR-101-3p.iso.t5:0.seed:0.t3:aa.ad:CAG.mm:0	16.4126	-0.927093	0.805152	-1.15145	0.249546	0.460177	CRC_vs_HC
hsa-miR-101-3p.iso.t5:0.seed:0.t3:aa.ad:CAT.mm:0	20.6875	-3.35553	0.65775	-5.10153	3.36926e-07	9.01361e-06	CRC_vs_HC
hsa-miR-101-3p.iso.t5:0.seed:0.t3:aa.ad:CC.mm:0	6.1834	-2.3951	0.654391	-3.66004	0.000252173	0.00245291	CRC_vs_HC
hsa-miR-101-3p.iso.t5:0.seed:0.t3:aa.ad:CCA.mm:0	1.42003	-0.9516	0.949373	-1.00235	0.316177	0.536037	CRC_vs_HC
hsa-miR-101-3p.iso.t5:0.seed:0.t3:aa.ad:CCC.mm:0	4.83038	-2.53406	0.827969	-3.06057	0.00220914	0.0145057	CRC_vs_HC
hsa-miR-101-3p.iso.t5:0.seed:0.t3:aa.ad:CCG.mm:0	2.22501	-1.37596	1.25189	-1.0991	0.271723	0.486643	CRC_vs_HC
hsa-miR-101-3p.iso.t5:0.seed:0.t3:aa.ad:CCT.mm:0	64.647	-2.88944	0.59216	-4.87949	1.0636e-06	2.40993e-05	CRC_vs_HC
hsa-miR-101-3p.iso.t5:0.seed:0.t3:aa.ad:CG.mm:0	0.0364648	-0.892537	3.81621	-0.23388	0.815078		CRC_vs_HC
hsa-miR-101-3p.iso.t5:0.seed:0.t3:aa.ad:CGA.mm:0	0.0167065	-0.879214	3.81626	-0.230386	0.817792		CRC_vs_HC
hsa-miR-101-3p.iso.t5:0.seed:0.t3:aa.ad:CGT.mm:0	0.0378572	-0.789676	3.81619	-0.206928	0.836066		CRC_vs_HC
hsa-miR-101-3p.iso.t5:0.seed:0.t3:aa.ad:CT.mm:0	2.68855	-1.22493	0.687322	-1.78218	0.0747205	0.206561	CRC_vs_HC
hsa-miR-101-3p.iso.t5:0.seed:0.t3:aa.ad:CTA.mm:0	0.0579625	-0.90266	3.81615	-0.236537	0.813016		CRC_vs_HC
hsa-miR-101-3p.iso.t5:0.seed:0.t3:aa.ad:CTT.mm:0	1.72934	-0.989793	0.871821	-1.13532	0.256243	0.467555	CRC_vs_HC
hsa-miR-101-3p.iso.t5:0.seed:0.t3:aa.ad:GAG.mm:0	0.442407	-0.314635	0.66166	-0.475524	0.634413	0.800181	CRC_vs_HC
hsa-miR-101-3p.iso.t5:0.seed:0.t3:aa.ad:GAT.mm:0	0.793841	-0.109323	0.511016	-0.213932	0.8306	0.910921	CRC_vs_HC
hsa-miR-101-3p.iso.t5:0.seed:0.t3:aa.ad:GCC.mm:0	0.11533	-1.16575	1.98308	-0.58785	0.556633		CRC_vs_HC
hsa-miR-101-3p.iso.t5:0.seed:0.t3:aa.ad:GCT.mm:0	1.65898	-0.489358	0.484731	-1.00955	0.312713	0.532567	CRC_vs_HC
hsa-miR-101-3p.iso.t5:0.seed:0.t3:aa.ad:GTT.mm:0	0.109743	-1.19149	1.76838	-0.673774	0.500455		CRC_vs_HC
hsa-miR-101-3p.iso.t5:0.seed:0.t3:aa.ad:T.mm:0	22.8885	-0.964447	0.238097	-4.05064	5.10778e-05	0.000660346	CRC_vs_HC
hsa-miR-101-3p.iso.t5:0.seed:0.t3:aa.ad:TA.mm:0	0.268228	0.634775	0.882659	0.719162	0.472041		CRC_vs_HC
hsa-miR-101-3p.iso.t5:0.seed:0.t3:aa.ad:TAA.mm:0	0.176328	-1.13379	1.33434	-0.849703	0.39549		CRC_vs_HC
hsa-miR-101-3p.iso.t5:0.seed:0.t3:aa.ad:TAG.mm:0	0.212726	0.193164	1.02106	0.18918	0.849952		CRC_vs_HC
hsa-miR-101-3p.iso.t5:0.seed:0.t3:aa.ad:TAT.mm:0	0.610011	-0.435731	0.550736	-0.791181	0.428839	0.63903	CRC_vs_HC
hsa-miR-101-3p.iso.t5:0.seed:0.t3:aa.ad:TCT.mm:0	1.80154	-0.959414	0.404891	-2.36956	0.0178093	0.0725852	CRC_vs_HC
hsa-miR-101-3p.iso.t5:0.seed:0.t3:aa.ad:TT.mm:0	0.275138	-0.526978	0.949099	-0.55524	0.578731		CRC_vs_HC
hsa-miR-101-3p.iso.t5:0.seed:0.t3:aa.ad:TTA.mm:0	0.157687	-0.620786	1.16489	-0.532916	0.594092		CRC_vs_HC
hsa-miR-101-3p.iso.t5:0.seed:0.t3:aa.ad:TTT.mm:0	0.371213	-0.163793	0.812681	-0.201546	0.840271		CRC_vs_HC
hsa-miR-101-3p.iso.t5:0.seed:0.t3:G.ad:0.mm:0	1288.26	-0.0845682	0.161552	-0.523474	0.600644	0.777084	CRC_vs_HC
hsa-miR-101-3p.iso.t5:0.seed:0.t3:G.ad:C.mm:0	1.58526	-0.337353	0.38356	-0.879532	0.379113	0.594502	CRC_vs_HC
hsa-miR-101-3p.iso.t5:0.seed:0.t3:G.ad:CC.mm:0	0.0356405	-0.558115	3.8164	-0.146241	0.883731		CRC_vs_HC
hsa-miR-101-3p.iso.t5:0.seed:0.t3:G.ad:CT.mm:0	0.269344	-0.459299	0.933835	-0.491842	0.622831		CRC_vs_HC
hsa-miR-101-3p.iso.t5:0.seed:0.t3:G.ad:T.mm:0	171.531	-0.457457	0.180877	-2.52911	0.0114352	0.0523471	CRC_vs_HC
hsa-miR-101-3p.iso.t5:0.seed:0.t3:G.ad:TA.mm:0	3.08103	-0.575081	0.319529	-1.79978	0.0718956	0.20058	CRC_vs_HC
hsa-miR-101-3p.iso.t5:0.seed:0.t3:G.ad:TAA.mm:0	0.217104	-0.447842	1.06328	-0.421191	0.673616		CRC_vs_HC
hsa-miR-101-3p.iso.t5:0.seed:0.t3:G.ad:TG.mm:0	0.168258	-1.07982	1.32552	-0.814635	0.415281		CRC_vs_HC
hsa-miR-101-3p.iso.t5:0.seed:0.t3:G.ad:TT.mm:0	1.63037	-0.769754	0.43716	-1.76081	0.0782711	0.214025	CRC_vs_HC
hsa-miR-101-3p.iso.t5:0.seed:0.t3:GA.ad:0.mm:0	191.655	-0.338017	0.174243	-1.93992	0.05239	0.160088	CRC_vs_HC
hsa-miR-101-3p.iso.t5:0.seed:0.t3:GA.ad:G.mm:0	0.179699	-0.497792	1.24339	-0.40035	0.688899		CRC_vs_HC
hsa-miR-101-3p.iso.t5:0.seed:0.t3:GA.ad:GA.mm:0	0.11699	0.209036	1.49615	0.139716	0.888884		CRC_vs_HC
hsa-miR-101-3p.iso.t5:0.seed:0.t3:GA.ad:T.mm:0	0.214173	-0.68489	1.3408	-0.510807	0.609486		CRC_vs_HC
hsa-miR-101-3p.iso.t5:0.seed:0.t3:gaa.ad:0.mm:0	135.488	-0.683277	0.21611	-3.16171	0.00156843	0.0109295	CRC_vs_HC
hsa-miR-101-3p.iso.t5:0.seed:0.t3:GAA.ad:0.mm:0	3.89189	-0.322196	0.282433	-1.14079	0.253958	0.465454	CRC_vs_HC
hsa-miR-101-3p.iso.t5:0.seed:0.t3:gaa.ad:A.mm:0	0.431218	-0.727142	0.674015	-1.07882	0.280667	0.496697	CRC_vs_HC
hsa-miR-101-3p.iso.t5:0.seed:0.t3:GAA.ad:A.mm:0	0.475962	0.39687	0.631603	0.628353	0.529773	0.726193	CRC_vs_HC
hsa-miR-101-3p.iso.t5:0.seed:0.t3:gaa.ad:AA.mm:0	0.324764	-0.892182	0.812637	-1.09789	0.272254		CRC_vs_HC
hsa-miR-101-3p.iso.t5:0.seed:0.t3:gaa.ad:AAA.mm:0	0.671999	-0.634579	0.642987	-0.986924	0.32368	0.542798	CRC_vs_HC
hsa-miR-101-3p.iso.t5:0.seed:0.t3:gaa.ad:AAT.mm:0	0.073848	-0.917075	2.03108	-0.451521	0.651614		CRC_vs_HC
hsa-miR-101-3p.iso.t5:0.seed:0.t3:gaa.ad:AGA.mm:0	0.015911	-0.575405	3.81645	-0.15077	0.880157		CRC_vs_HC
hsa-miR-101-3p.iso.t5:0.seed:0.t3:gaa.ad:CAA.mm:0	0.295832	-0.94322	1.30624	-0.722087	0.470241		CRC_vs_HC
hsa-miR-101-3p.iso.t5:0.seed:0.t3:GAA.ad:G.mm:0	0.0759258	-0.568288	2.29129	-0.248021	0.804118		CRC_vs_HC
hsa-miR-101-3p.iso.t5:0.seed:0.t3:gaa.ad:T.mm:0	0.856987	-2.47613	0.762481	-3.24747	0.00116436	0.0086077	CRC_vs_HC
hsa-miR-101-3p.iso.t5:0.seed:0.t3:gaa.ad:TA.mm:0	2.67678	-2.758	0.69513	-3.96759	7.2602e-05	0.000882658	CRC_vs_HC
hsa-miR-101-3p.iso.t5:0.seed:0.t3:gaa.ad:TAA.mm:0	4.33601	-2.00331	0.565737	-3.54107	0.000398513	0.00358628	CRC_vs_HC
hsa-miR-101-3p.iso.t5:0.seed:0.t3:gaa.ad:TAC.mm:0	0.466104	-2.01973	0.798421	-2.52966	0.0114175	0.0523471	CRC_vs_HC
hsa-miR-101-3p.iso.t5:0.seed:0.t3:gaa.ad:TAT.mm:0	0.358491	-1.97575	0.852743	-2.31693	0.0205074		CRC_vs_HC
hsa-miR-101-3p.iso.t5:0.seed:0.t3:gaa.ad:TCC.mm:0	0.0691722	-1.21651	3.03386	-0.400977	0.688437		CRC_vs_HC
hsa-miR-101-3p.iso.t5:0.seed:0.t3:gaa.ad:TT.mm:0	0.0726003	-1.0046	3.02247	-0.332378	0.739604		CRC_vs_HC
hsa-miR-101-3p.iso.t5:0.seed:0.t3:GG.ad:0.mm:0	2.11094	-0.136096	0.380033	-0.358116	0.720256	0.856809	CRC_vs_HC
hsa-miR-101-3p.iso.t5:0.seed:0.t3:GG.ad:T.mm:0	0.0343563	-0.928313	3.81628	-0.243251	0.807811		CRC_vs_HC
hsa-miR-101-3p.iso.t5:0.seed:0.t3:GGA.ad:0.mm:0	0.269705	-0.933751	1.23303	-0.75728	0.448882		CRC_vs_HC
hsa-miR-101-3p.iso.t5:G.seed:0.t3:0.ad:0.mm:0	914.557	0.0666819	0.117564	0.567194	0.570582	0.75371	CRC_vs_HC
hsa-miR-101-3p.iso.t5:G.seed:0.t3:0.ad:A.mm:0	135.51	-0.0256567	0.148914	-0.172292	0.863208	0.930923	CRC_vs_HC
hsa-miR-101-3p.iso.t5:G.seed:0.t3:0.ad:AA.mm:0	4.44159	0.204428	0.285688	0.715563	0.474261	0.681081	CRC_vs_HC
hsa-miR-101-3p.iso.t5:G.seed:0.t3:0.ad:AAA.mm:0	0.0210384	-0.510308	3.81642	-0.133714	0.893629		CRC_vs_HC
hsa-miR-101-3p.iso.t5:G.seed:0.t3:0.ad:AC.mm:0	0.110437	-0.29514	2.51999	-0.117119	0.906765		CRC_vs_HC
hsa-miR-101-3p.iso.t5:G.seed:0.t3:0.ad:AG.mm:0	0.0244854	-0.725638	3.81645	-0.190134	0.849204		CRC_vs_HC
hsa-miR-101-3p.iso.t5:G.seed:0.t3:0.ad:AT.mm:0	0.320011	-0.589156	0.772878	-0.762288	0.445888		CRC_vs_HC
hsa-miR-101-3p.iso.t5:G.seed:0.t3:0.ad:C.mm:0	4.03857	0.503425	0.264042	1.90661	0.056571	0.169087	CRC_vs_HC
hsa-miR-101-3p.iso.t5:G.seed:0.t3:0.ad:CA.mm:0	0.177221	-0.0535908	1.34133	-0.0399534	0.96813		CRC_vs_HC
hsa-miR-101-3p.iso.t5:G.seed:0.t3:0.ad:CCA.mm:0	0.148276	-1.0874	1.45672	-0.746469	0.455384		CRC_vs_HC
hsa-miR-101-3p.iso.t5:G.seed:0.t3:0.ad:CT.mm:0	0.208774	-0.530797	1.21458	-0.437021	0.662096		CRC_vs_HC
hsa-miR-101-3p.iso.t5:G.seed:0.t3:0.ad:T.mm:0	55.4247	-0.211596	0.140887	-1.50189	0.133126	0.307835	CRC_vs_HC
hsa-miR-101-3p.iso.t5:G.seed:0.t3:0.ad:TA.mm:0	3.09256	-0.497998	0.303275	-1.64206	0.100577	0.253624	CRC_vs_HC
hsa-miR-101-3p.iso.t5:G.seed:0.t3:0.ad:TG.mm:0	0.141893	-0.959869	1.44178	-0.665752	0.505569		CRC_vs_HC
hsa-miR-101-3p.iso.t5:G.seed:0.t3:0.ad:TT.mm:0	7.28292	0.126362	0.220024	0.574311	0.565758	0.750265	CRC_vs_HC
hsa-miR-101-3p.iso.t5:G.seed:0.t3:a.ad:0.mm:0	1424.59	-0.200055	0.137532	-1.45461	0.145777	0.327627	CRC_vs_HC
hsa-miR-101-3p.iso.t5:G.seed:0.t3:a.ad:C.mm:0	131.548	-0.0828909	0.166906	-0.496631	0.619449	0.789146	CRC_vs_HC
hsa-miR-101-3p.iso.t5:G.seed:0.t3:a.ad:CA.mm:0	2.38779	-0.215947	0.409001	-0.527987	0.597508	0.774604	CRC_vs_HC
hsa-miR-101-3p.iso.t5:G.seed:0.t3:a.ad:CC.mm:0	2.44759	0.906101	0.377512	2.40019	0.0163865	0.0685658	CRC_vs_HC
hsa-miR-101-3p.iso.t5:G.seed:0.t3:a.ad:CCT.mm:0	0.103308	-0.413344	1.97616	-0.209165	0.834319		CRC_vs_HC
hsa-miR-101-3p.iso.t5:G.seed:0.t3:a.ad:CG.mm:0	0.173463	-0.940021	1.22158	-0.769514	0.441588		CRC_vs_HC
hsa-miR-101-3p.iso.t5:G.seed:0.t3:a.ad:CT.mm:0	26.4786	-0.713575	0.234457	-3.04353	0.00233823	0.0151781	CRC_vs_HC
hsa-miR-101-3p.iso.t5:G.seed:0.t3:a.ad:G.mm:0	0.912099	0.422215	0.431062	0.979477	0.327344	0.546071	CRC_vs_HC
hsa-miR-101-3p.iso.t5:G.seed:0.t3:a.ad:GA.mm:0	1.3888	-0.338589	0.410707	-0.824406	0.409709	0.622279	CRC_vs_HC
hsa-miR-101-3p.iso.t5:G.seed:0.t3:a.ad:GTT.mm:0	0.0242741	-0.562137	3.81645	-0.147293	0.882901		CRC_vs_HC
hsa-miR-101-3p.iso.t5:G.seed:0.t3:a.ad:T.mm:0	67.237	-0.218537	0.111607	-1.9581	0.0502179	0.155606	CRC_vs_HC
hsa-miR-101-3p.iso.t5:G.seed:0.t3:a.ad:TA.mm:0	9.97046	-0.354408	0.205225	-1.72692	0.0841815	0.225039	CRC_vs_HC
hsa-miR-101-3p.iso.t5:G.seed:0.t3:a.ad:TT.mm:0	1.94559	-0.442541	0.37119	-1.19222	0.233174	0.44047	CRC_vs_HC
hsa-miR-101-3p.iso.t5:G.seed:0.t3:aa.ad:0.mm:0	371.21	-0.209043	0.142284	-1.4692	0.14178	0.321518	CRC_vs_HC
hsa-miR-101-3p.iso.t5:G.seed:0.t3:aa.ad:C.mm:0	0.573878	-0.814916	0.708468	-1.15025	0.250041	0.460758	CRC_vs_HC
hsa-miR-101-3p.iso.t5:G.seed:0.t3:aa.ad:CA.mm:0	0.584903	-1.34027	0.777873	-1.72299	0.0848908	0.226471	CRC_vs_HC
hsa-miR-101-3p.iso.t5:G.seed:0.t3:aa.ad:CC.mm:0	0.210881	-0.742785	1.24898	-0.594714	0.552035		CRC_vs_HC
hsa-miR-101-3p.iso.t5:G.seed:0.t3:aa.ad:CT.mm:0	0.265535	-0.939834	0.824645	-1.13968	0.254419		CRC_vs_HC
hsa-miR-101-3p.iso.t5:G.seed:0.t3:aa.ad:T.mm:0	16.2046	-0.431923	0.188851	-2.28711	0.0221892	0.0854368	CRC_vs_HC
hsa-miR-101-3p.iso.t5:G.seed:0.t3:aa.ad:TT.mm:0	0.26329	-1.53438	0.829828	-1.84904	0.0644521		CRC_vs_HC
hsa-miR-101-3p.iso.t5:G.seed:0.t3:G.ad:0.mm:0	5.09965	0.0512485	0.239192	0.214257	0.830347	0.910828	CRC_vs_HC
hsa-miR-101-3p.iso.t5:G.seed:0.t3:G.ad:T.mm:0	0.574071	-0.145559	0.636749	-0.228598	0.819182	0.904588	CRC_vs_HC
hsa-miR-101-3p.iso.t5:G.seed:0.t3:GA.ad:0.mm:0	0.293132	-0.274643	0.835881	-0.328568	0.742483		CRC_vs_HC
hsa-miR-101-3p.iso.t5:G.seed:0.t3:gaa.ad:0.mm:0	632.893	-0.602737	0.16997	-3.54613	0.000390928	0.00353273	CRC_vs_HC
hsa-miR-101-3p.iso.t5:G.seed:0.t3:gaa.ad:A.mm:0	0.82033	-0.84083	0.496381	-1.69392	0.0902802	0.236545	CRC_vs_HC
hsa-miR-101-3p.iso.t5:G.seed:0.t3:gaa.ad:AA.mm:0	0.688522	-0.700411	0.619579	-1.13046	0.258281	0.46995	CRC_vs_HC
hsa-miR-101-3p.iso.t5:G.seed:0.t3:gaa.ad:AAA.mm:0	0.494019	-0.409769	0.664174	-0.61696	0.537261	0.731878	CRC_vs_HC
hsa-miR-101-3p.iso.t5:G.seed:0.t3:gaa.ad:AAC.mm:0	0.0516028	-0.843591	3.72688	-0.226353	0.820927		CRC_vs_HC
hsa-miR-101-3p.iso.t5:G.seed:0.t3:gaa.ad:AGA.mm:0	0.0752872	-1.25138	3.0081	-0.416002	0.677408		CRC_vs_HC
hsa-miR-101-3p.iso.t5:G.seed:0.t3:gaa.ad:AGG.mm:0	0.0190437	-0.968461	3.81637	-0.253765	0.799677		CRC_vs_HC
hsa-miR-101-3p.iso.t5:G.seed:0.t3:gaa.ad:AT.mm:0	0.400368	-0.669135	0.790674	-0.846285	0.397394		CRC_vs_HC
hsa-miR-101-3p.iso.t5:G.seed:0.t3:gaa.ad:CA.mm:0	0.29414	-0.921832	0.857559	-1.07495	0.282397		CRC_vs_HC
hsa-miR-101-3p.iso.t5:G.seed:0.t3:gaa.ad:CAA.mm:0	0.151901	-0.545663	1.12237	-0.486171	0.626846		CRC_vs_HC
hsa-miR-101-3p.iso.t5:G.seed:0.t3:gaa.ad:T.mm:0	0.152209	-1.04424	1.47491	-0.708001	0.478945		CRC_vs_HC
hsa-miR-101-3p.iso.t5:G.seed:0.t3:gaa.ad:TA.mm:0	0.245866	-1.14355	0.895475	-1.27703	0.201591		CRC_vs_HC
hsa-miR-101-3p.iso.t5:G.seed:0.t3:gaa.ad:TAA.mm:0	0.300835	-1.00805	1.00901	-0.999044	0.317773		CRC_vs_HC
hsa-miR-101-3p.iso.t5:G.seed:0.t3:gaa.ad:TTA.mm:0	0.0804008	-0.900364	2.2694	-0.396741	0.691559		CRC_vs_HC
hsa-miR-101-3p.iso.t5:GG.seed:0.t3:a.ad:0.mm:0	0.333836	-0.503067	0.682753	-0.736821	0.461231		CRC_vs_HC
hsa-miR-101-3p.iso.t5:GG.seed:0.t3:aa.ad:0.mm:0	0.306846	-0.658626	0.99229	-0.663744	0.506854		CRC_vs_HC
hsa-miR-101-3p.iso.t5:GG.seed:0.t3:gaa.ad:0.mm:0	0.666329	-0.715694	0.630539	-1.13505	0.256354	0.467624	CRC_vs_HC
hsa-miR-101-3p.iso.t5:t.seed:0.t3:0.ad:0.mm:0	0.785879	-0.886271	0.503698	-1.75953	0.0784876	0.214378	CRC_vs_HC
hsa-miR-101-3p.iso.t5:t.seed:0.t3:0.ad:A.mm:0	0.5013	-0.555138	0.651185	-0.852505	0.393934	0.60903	CRC_vs_HC
hsa-miR-101-3p.iso.t5:t.seed:0.t3:0.ad:CT.mm:0	0.0500246	-0.880683	3.73812	-0.235595	0.813747		CRC_vs_HC
hsa-miR-101-3p.iso.t5:t.seed:0.t3:0.ad:T.mm:0	1.91137	0.0188751	0.353574	0.0533838	0.957426	0.978777	CRC_vs_HC
hsa-miR-101-3p.iso.t5:t.seed:0.t3:0.ad:TT.mm:0	0.370266	-1.36445	0.72532	-1.88116	0.0599496		CRC_vs_HC
hsa-miR-101-3p.iso.t5:t.seed:0.t3:a.ad:0.mm:0	0.593749	-0.633015	0.649488	-0.974638	0.32974	0.548452	CRC_vs_HC
hsa-miR-101-3p.iso.t5:t.seed:0.t3:a.ad:C.mm:0	0.139844	-0.751783	1.60764	-0.467631	0.640049		CRC_vs_HC
hsa-miR-101-3p.iso.t5:t.seed:0.t3:a.ad:CC.mm:0	0.155874	-0.231677	1.48996	-0.155493	0.876433		CRC_vs_HC
hsa-miR-101-3p.iso.t5:t.seed:0.t3:a.ad:CG.mm:0	0.01755	-0.91628	3.81627	-0.240098	0.810254		CRC_vs_HC
hsa-miR-101-3p.iso.t5:t.seed:0.t3:a.ad:CT.mm:0	2.15856	-0.933068	0.352638	-2.64597	0.00814575	0.040385	CRC_vs_HC
hsa-miR-101-3p.iso.t5:t.seed:0.t3:a.ad:T.mm:0	0.100021	-0.299333	1.99106	-0.150339	0.880497		CRC_vs_HC
hsa-miR-101-3p.iso.t5:t.seed:0.t3:a.ad:TT.mm:0	0.055483	-0.701312	3.69978	-0.189555	0.849658		CRC_vs_HC
hsa-miR-101-3p.iso.t5:t.seed:0.t3:aa.ad:0.mm:0	0.102794	-0.285849	2.22202	-0.128644	0.897639		CRC_vs_HC
hsa-miR-101-3p.iso.t5:t.seed:0.t3:G.ad:0.mm:0	1.74312	-0.351348	0.407484	-0.862239	0.388556	0.60416	CRC_vs_HC
hsa-miR-101-3p.iso.t5:t.seed:0.t3:G.ad:T.mm:0	1.25623	0.373379	0.41873	0.891694	0.372557	0.588466	CRC_vs_HC
hsa-miR-101-3p.iso.t5:t.seed:0.t3:G.ad:TA.mm:0	0.0750308	-0.438505	2.02485	-0.216562	0.82855		CRC_vs_HC
hsa-miR-101-3p.iso.t5:t.seed:0.t3:GA.ad:0.mm:0	0.499222	-0.394054	0.773707	-0.509306	0.610538	0.782949	CRC_vs_HC
hsa-miR-101-3p.iso.t5:ta.seed:0.t3:0.ad:0.mm:0	0.535639	-0.380463	0.672252	-0.565953	0.571426	0.75464	CRC_vs_HC
hsa-miR-101-3p.iso.t5:ta.seed:0.t3:0.ad:AGT.mm:0	0.139785	-1.43346	1.32639	-1.08073	0.279819		CRC_vs_HC
hsa-miR-101-3p.iso.t5:ta.seed:0.t3:0.ad:T.mm:0	0.720945	-0.3735	0.563429	-0.662905	0.507391	0.708484	CRC_vs_HC
hsa-miR-101-3p.iso.t5:ta.seed:0.t3:0.ad:TT.mm:0	0.528917	-1.03245	0.715892	-1.44219	0.149249	0.33287	CRC_vs_HC
hsa-miR-101-3p.iso.t5:ta.seed:0.t3:a.ad:0.mm:0	0.389661	-1.09247	1.1951	-0.914125	0.360651		CRC_vs_HC
hsa-miR-101-3p.iso.t5:ta.seed:0.t3:a.ad:CC.mm:0	0.103955	-1.28446	1.76682	-0.726991	0.467231		CRC_vs_HC
hsa-miR-101-3p.iso.t5:ta.seed:0.t3:a.ad:CT.mm:0	0.610871	-0.961141	0.669175	-1.43631	0.150915	0.335324	CRC_vs_HC
hsa-miR-101-3p.iso.t5:ta.seed:0.t3:G.ad:0.mm:0	0.327961	0.592575	0.657299	0.90153	0.367307		CRC_vs_HC
hsa-miR-101-3p.iso.t5:ta.seed:0.t3:G.ad:T.mm:0	0.418326	-0.495654	0.662627	-0.748012	0.454453	0.663836	CRC_vs_HC
hsa-miR-101-3p.iso.t5:ta.seed:0.t3:G.ad:TA.mm:0	0.0738786	-0.902373	3.04128	-0.296709	0.766689		CRC_vs_HC
hsa-miR-101-3p.iso.t5:ta.seed:0.t3:GA.ad:0.mm:0	0.357966	-1.39512	0.686392	-2.03254	0.0420985		CRC_vs_HC
hsa-miR-101-3p.iso.t5:ta.seed:0.t3:GAA.ad:0.mm:0	0.137696	-0.843198	1.44077	-0.585243	0.558384		CRC_vs_HC
hsa-miR-101-3p.iso.t5:ta.seed:0.t3:GAA.ad:A.mm:0	0.073406	-0.4649	3.04122	-0.152867	0.878504		CRC_vs_HC
hsa-miR-101-3p.iso.t5:tac.seed:0.t3:a.ad:CT.mm:0	0.090273	-1.62132	3.49197	-0.464299	0.642434		CRC_vs_HC
hsa-miR-101-3p.iso.t5:tac.seed:0.t3:G.ad:0.mm:0	0.132229	-0.499682	2.46972	-0.202324	0.839664		CRC_vs_HC
hsa-miR-101-3p.ref.t5:0.seed:0.t3:0.ad:0.mm:0	1167.32	-0.425065	0.162555	-2.6149	0.00892526	0.0434328	CRC_vs_HC
hsa-miR-101-5p.iso.t5:0.seed:0.t3:ct.ad:0.mm:0	0.905507	-0.229484	0.53782	-0.426693	0.669603	0.824361	CRC_vs_HC
hsa-miR-101-5p.iso.t5:0.seed:0.t3:ct.ad:T.mm:0	0.174677	-0.670208	1.26216	-0.530999	0.595419		CRC_vs_HC
hsa-miR-101-5p.iso.t5:0.seed:0.t3:G.ad:0.mm:0	0.518523	-0.732559	0.558959	-1.31058	0.190001	0.387855	CRC_vs_HC
hsa-miR-101-5p.iso.t5:0.seed:0.t3:gct.ad:0.mm:0	0.537288	-1.2667	0.644905	-1.96416	0.0495116	0.153992	CRC_vs_HC
hsa-miR-101-5p.iso.t5:0.seed:0.t3:gct.ad:T.mm:0	0.085648	-0.944659	3.4973	-0.270111	0.787075		CRC_vs_HC
hsa-miR-101-5p.iso.t5:0.seed:0.t3:t.ad:0.mm:0	5.30394	-0.000579507	0.301147	-0.00192434	0.998465	0.999945	CRC_vs_HC
hsa-miR-101-5p.iso.t5:c.seed:0.t3:ct.ad:0.mm:0	0.00986998	-1.03477	3.81641	-0.271137	0.786286		CRC_vs_HC
hsa-miR-101-5p.iso.t5:T.seed:0.t3:0.ad:0.mm:0	2.85034	-0.379277	0.282062	-1.34466	0.178734	0.374252	CRC_vs_HC
hsa-miR-101-5p.iso.t5:T.seed:0.t3:ct.ad:0.mm:0	7.05311	-0.264049	0.244988	-1.0778	0.281122	0.497196	CRC_vs_HC
hsa-miR-101-5p.iso.t5:T.seed:0.t3:ct.ad:A.mm:0	0.34121	-0.495594	0.74421	-0.665933	0.505454		CRC_vs_HC
hsa-miR-101-5p.iso.t5:T.seed:0.t3:G.ad:0.mm:0	0.121986	-1.31969	1.97908	-0.666818	0.504888		CRC_vs_HC
hsa-miR-101-5p.iso.t5:T.seed:0.t3:gct.ad:0.mm:0	2.21515	-0.471103	0.32789	-1.43677	0.150783	0.335184	CRC_vs_HC
hsa-miR-101-5p.iso.t5:T.seed:0.t3:gct.ad:A.mm:0	0.672581	-0.975029	0.608461	-1.60245	0.109056	0.268064	CRC_vs_HC
hsa-miR-101-5p.iso.t5:T.seed:0.t3:t.ad:0.mm:0	7.13485	-0.28251	0.250689	-1.12694	0.25977	0.471785	CRC_vs_HC
hsa-miR-101-5p.ref.t5:0.seed:0.t3:0.ad:0.mm:0	1.78029	0.521086	0.338837	1.53787	0.124081	0.294418	CRC_vs_HC
hsa-miR-103a-2-5p.iso.t5:0.seed:0.t3:0.ad:A.mm:0	0.140162	-0.30177	1.24339	-0.242699	0.808239		CRC_vs_HC
hsa-miR-103a-2-5p.iso.t5:0.seed:0.t3:g.ad:T.mm:0	0.0514986	-0.102314	3.74801	-0.0272983	0.978222		CRC_vs_HC
hsa-miR-103a-2-5p.iso.t5:0.seed:0.t3:g.ad:TAA.mm:0	0.00968238	-0.661652	3.81647	-0.173368	0.862362		CRC_vs_HC
hsa-miR-103a-2-5p.iso.t5:0.seed:0.t3:g.ad:TG.mm:0	0.0285014	-1.1822	3.81621	-0.309782	0.756726		CRC_vs_HC
hsa-miR-103a-2-5p.iso.t5:0.seed:0.t3:T.ad:0.mm:0	0.503445	-0.627955	0.613672	-1.02328	0.306177	0.525598	CRC_vs_HC
hsa-miR-103a-2-5p.ref.t5:0.seed:0.t3:0.ad:0.mm:0	0.458871	-0.557823	0.55465	-1.00572	0.314549	0.533948	CRC_vs_HC
hsa-miR-103a-3p.iso.t5:0.seed:0.t3:0.ad:C.mm:0	1.68339	-0.222691	0.446034	-0.499268	0.61759	0.787508	CRC_vs_HC
hsa-miR-103a-3p.iso.t5:0.seed:0.t3:0.ad:CA.mm:0	0.084727	-0.620221	2.26845	-0.273412	0.784537		CRC_vs_HC
hsa-miR-103a-3p.iso.t5:0.seed:0.t3:0.ad:CG.mm:0	0.0411695	-1.13953	3.81598	-0.298621	0.765229		CRC_vs_HC
hsa-miR-103a-3p.iso.t5:0.seed:0.t3:0.ad:CT.mm:0	1.98177	0.312855	0.348289	0.898264	0.369045	0.584759	CRC_vs_HC
hsa-miR-103a-3p.iso.t5:0.seed:0.t3:0.ad:G.mm:0	6.35107	-0.0111527	0.181246	-0.0615333	0.950934	0.975021	CRC_vs_HC
hsa-miR-103a-3p.iso.t5:0.seed:0.t3:0.ad:GA.mm:0	1.19979	-0.0594561	0.403536	-0.147338	0.882865	0.941119	CRC_vs_HC
hsa-miR-103a-3p.iso.t5:0.seed:0.t3:0.ad:GC.mm:0	0.129559	-0.130478	1.9277	-0.067686	0.946036		CRC_vs_HC
hsa-miR-103a-3p.iso.t5:0.seed:0.t3:0.ad:GT.mm:0	2.41893	-0.153402	0.289455	-0.529971	0.596132	0.773469	CRC_vs_HC
hsa-miR-103a-3p.iso.t5:0.seed:0.t3:0.ad:GTT.mm:0	0.117692	-0.921509	1.75199	-0.525978	0.598903		CRC_vs_HC
hsa-miR-103a-3p.iso.t5:0.seed:0.t3:0.ad:T.mm:0	215.656	-0.0466034	0.123281	-0.378027	0.705411	0.847662	CRC_vs_HC
hsa-miR-103a-3p.iso.t5:0.seed:0.t3:0.ad:TA.mm:0	2.19137	0.471516	0.346135	1.36223	0.173125	0.366888	CRC_vs_HC
hsa-miR-103a-3p.iso.t5:0.seed:0.t3:0.ad:TAT.mm:0	0.293102	-0.29159	0.917525	-0.3178	0.750637		CRC_vs_HC
hsa-miR-103a-3p.iso.t5:0.seed:0.t3:0.ad:TC.mm:0	0.329781	-0.0869688	0.890502	-0.0976626	0.9222		CRC_vs_HC
hsa-miR-103a-3p.iso.t5:0.seed:0.t3:0.ad:TCT.mm:0	0.11533	-1.43586	2.49432	-0.575652	0.56485		CRC_vs_HC
hsa-miR-103a-3p.iso.t5:0.seed:0.t3:0.ad:TG.mm:0	1.33206	0.0303111	0.425636	0.0712136	0.943228	0.971296	CRC_vs_HC
hsa-miR-103a-3p.iso.t5:0.seed:0.t3:0.ad:TT.mm:0	12.2875	-0.0943795	0.21208	-0.445019	0.656306	0.815338	CRC_vs_HC
hsa-miR-103a-3p.iso.t5:0.seed:0.t3:0.ad:TTC.mm:0	0.0638987	-0.332051	3.06416	-0.108366	0.913705		CRC_vs_HC
hsa-miR-103a-3p.iso.t5:0.seed:0.t3:0.ad:TTT.mm:0	0.649236	-0.198231	0.640362	-0.30956	0.756895	0.877174	CRC_vs_HC
hsa-miR-103a-3p.iso.t5:0.seed:0.t3:a.ad:0.mm:0	789.802	-0.0432035	0.0959187	-0.450418	0.652409	0.812449	CRC_vs_HC
hsa-miR-103a-3p.iso.t5:0.seed:0.t3:A.ad:0.mm:0	78.0105	0.219893	0.101929	2.15732	0.0309809	0.10914	CRC_vs_HC
hsa-miR-103a-3p.iso.t5:0.seed:0.t3:a.ad:C.mm:0	11.0708	-0.0352256	0.217068	-0.162279	0.871086	0.934647	CRC_vs_HC
hsa-miR-103a-3p.iso.t5:0.seed:0.t3:A.ad:C.mm:0	0.328711	0.174198	0.81329	0.21419	0.830399		CRC_vs_HC
hsa-miR-103a-3p.iso.t5:0.seed:0.t3:a.ad:CA.mm:0	0.330506	0.073351	0.70847	0.103534	0.917539		CRC_vs_HC
hsa-miR-103a-3p.iso.t5:0.seed:0.t3:a.ad:CT.mm:0	0.418335	-1.2636	0.728474	-1.73459	0.0828139	0.22265	CRC_vs_HC
hsa-miR-103a-3p.iso.t5:0.seed:0.t3:a.ad:GT.mm:0	0.40088	-0.397066	0.810362	-0.489986	0.624144		CRC_vs_HC
hsa-miR-103a-3p.iso.t5:0.seed:0.t3:a.ad:T.mm:0	941.365	-0.192696	0.115518	-1.6681	0.0952958	0.245637	CRC_vs_HC
hsa-miR-103a-3p.iso.t5:0.seed:0.t3:A.ad:T.mm:0	12.8787	0.190456	0.185801	1.02505	0.305339	0.524742	CRC_vs_HC
hsa-miR-103a-3p.iso.t5:0.seed:0.t3:a.ad:TA.mm:0	44.7028	-0.127588	0.157311	-0.811059	0.417332	0.628238	CRC_vs_HC
hsa-miR-103a-3p.iso.t5:0.seed:0.t3:A.ad:TA.mm:0	0.0966598	-0.443149	1.7911	-0.247418	0.804585		CRC_vs_HC
hsa-miR-103a-3p.iso.t5:0.seed:0.t3:a.ad:TAA.mm:0	1.24996	0.769395	0.449311	1.71239	0.0868249	0.229933	CRC_vs_HC
hsa-miR-103a-3p.iso.t5:0.seed:0.t3:a.ad:TAC.mm:0	0.028415	-0.779375	3.81641	-0.204217	0.838184		CRC_vs_HC
hsa-miR-103a-3p.iso.t5:0.seed:0.t3:a.ad:TAT.mm:0	2.32326	-0.369656	0.349763	-1.05687	0.290569	0.508084	CRC_vs_HC
hsa-miR-103a-3p.iso.t5:0.seed:0.t3:a.ad:TC.mm:0	0.909624	-0.207495	0.598441	-0.346726	0.728797	0.862271	CRC_vs_HC
hsa-miR-103a-3p.iso.t5:0.seed:0.t3:a.ad:TCT.mm:0	0.387223	-1.19204	0.71109	-1.67635	0.0936689		CRC_vs_HC
hsa-miR-103a-3p.iso.t5:0.seed:0.t3:a.ad:TG.mm:0	0.645356	0.196666	0.550938	0.356966	0.721117	0.856936	CRC_vs_HC
hsa-miR-103a-3p.iso.t5:0.seed:0.t3:a.ad:TGT.mm:0	0.142338	-0.360027	1.58435	-0.22724	0.820237		CRC_vs_HC
hsa-miR-103a-3p.iso.t5:0.seed:0.t3:a.ad:TT.mm:0	153.655	-0.152782	0.196112	-0.779058	0.435946	0.646235	CRC_vs_HC
hsa-miR-103a-3p.iso.t5:0.seed:0.t3:A.ad:TT.mm:0	1.62536	0.261035	0.356383	0.732457	0.46389	0.671557	CRC_vs_HC
hsa-miR-103a-3p.iso.t5:0.seed:0.t3:a.ad:TTA.mm:0	0.228434	-1.45958	1.44973	-1.0068	0.314033		CRC_vs_HC
hsa-miR-103a-3p.iso.t5:0.seed:0.t3:A.ad:TTC.mm:0	0.0151381	-1.16973	3.81624	-0.306514	0.759213		CRC_vs_HC
hsa-miR-103a-3p.iso.t5:0.seed:0.t3:a.ad:TTT.mm:0	1.73505	-0.33077	0.404973	-0.81677	0.41406	0.626335	CRC_vs_HC
hsa-miR-103a-3p.iso.t5:0.seed:0.t3:A.ad:TTT.mm:0	0.161299	-0.564091	1.95747	-0.288174	0.773214		CRC_vs_HC
hsa-miR-103a-3p.iso.t5:0.seed:0.t3:AA.ad:0.mm:0	12.9934	0.817344	0.179807	4.54568	5.47581e-06	9.81468e-05	CRC_vs_HC
hsa-miR-103a-3p.iso.t5:0.seed:0.t3:AA.ad:A.mm:0	0.641943	0.857248	0.62494	1.37173	0.170148	0.362285	CRC_vs_HC
hsa-miR-103a-3p.iso.t5:0.seed:0.t3:AA.ad:AA.mm:0	0.165494	-0.310541	1.5572	-0.199423	0.841932		CRC_vs_HC
hsa-miR-103a-3p.iso.t5:0.seed:0.t3:AA.ad:T.mm:0	0.508412	0.637994	0.531725	1.19986	0.230195	0.437591	CRC_vs_HC
hsa-miR-103a-3p.iso.t5:0.seed:0.t3:AG.ad:0.mm:0	0.507732	-1.16231	0.607557	-1.91309	0.0557365	0.167426	CRC_vs_HC
hsa-miR-103a-3p.iso.t5:0.seed:0.t3:AG.ad:A.mm:0	0.17728	-1.11046	1.42504	-0.779248	0.435834		CRC_vs_HC
hsa-miR-103a-3p.iso.t5:0.seed:0.t3:AG.ad:T.mm:0	0.15161	0.0999982	1.63536	0.0611474	0.951242		CRC_vs_HC
hsa-miR-103a-3p.iso.t5:0.seed:0.t3:ga.ad:0.mm:0	459.939	-0.139314	0.122092	-1.14106	0.253845	0.465326	CRC_vs_HC
hsa-miR-103a-3p.iso.t5:0.seed:0.t3:ga.ad:A.mm:0	39.3482	0.0101668	0.125011	0.0813268	0.935182	0.967446	CRC_vs_HC
hsa-miR-103a-3p.iso.t5:0.seed:0.t3:ga.ad:AA.mm:0	40.8618	0.027649	0.163084	0.169539	0.865373	0.932142	CRC_vs_HC
hsa-miR-103a-3p.iso.t5:0.seed:0.t3:ga.ad:AAA.mm:0	1.28452	0.0910678	0.40158	0.226774	0.8206	0.905281	CRC_vs_HC
hsa-miR-103a-3p.iso.t5:0.seed:0.t3:ga.ad:AAG.mm:0	0.213106	-0.911249	1.2368	-0.736781	0.461256		CRC_vs_HC
hsa-miR-103a-3p.iso.t5:0.seed:0.t3:ga.ad:AAT.mm:0	2.0173	-0.244421	0.389176	-0.628049	0.529972	0.726212	CRC_vs_HC
hsa-miR-103a-3p.iso.t5:0.seed:0.t3:ga.ad:AC.mm:0	0.0866941	-0.688133	2.55482	-0.269347	0.787663		CRC_vs_HC
hsa-miR-103a-3p.iso.t5:0.seed:0.t3:ga.ad:ACT.mm:0	0.144488	-1.47715	2.15368	-0.685871	0.492794		CRC_vs_HC
hsa-miR-103a-3p.iso.t5:0.seed:0.t3:ga.ad:AG.mm:0	1.69773	0.105539	0.35837	0.294498	0.768377	0.883846	CRC_vs_HC
hsa-miR-103a-3p.iso.t5:0.seed:0.t3:ga.ad:AGA.mm:0	0.78232	-0.0376952	0.49837	-0.075637	0.939708	0.969608	CRC_vs_HC
hsa-miR-103a-3p.iso.t5:0.seed:0.t3:ga.ad:AGC.mm:0	0.0383223	-0.229833	3.81627	-0.0602246	0.951977		CRC_vs_HC
hsa-miR-103a-3p.iso.t5:0.seed:0.t3:ga.ad:AGT.mm:0	0.576155	-0.00783466	0.630402	-0.012428	0.990084	0.994734	CRC_vs_HC
hsa-miR-103a-3p.iso.t5:0.seed:0.t3:ga.ad:AT.mm:0	6.28312	0.00187054	0.247159	0.00756816	0.993962	0.996636	CRC_vs_HC
hsa-miR-103a-3p.iso.t5:0.seed:0.t3:ga.ad:ATA.mm:0	0.25114	-1.59705	1.03673	-1.54046	0.123448		CRC_vs_HC
hsa-miR-103a-3p.iso.t5:0.seed:0.t3:ga.ad:ATT.mm:0	0.346026	-0.144604	0.684106	-0.211377	0.832593		CRC_vs_HC
hsa-miR-103a-3p.iso.t5:0.seed:0.t3:ga.ad:T.mm:0	83.575	0.0534147	0.127302	0.41959	0.674785	0.827807	CRC_vs_HC
hsa-miR-103a-3p.iso.t5:0.seed:0.t3:ga.ad:TA.mm:0	4.45575	-0.869803	0.293707	-2.96146	0.00306182	0.0188131	CRC_vs_HC
hsa-miR-103a-3p.iso.t5:0.seed:0.t3:ga.ad:TAA.mm:0	0.309872	-0.405796	0.81347	-0.498846	0.617888		CRC_vs_HC
hsa-miR-103a-3p.iso.t5:0.seed:0.t3:ga.ad:TAT.mm:0	0.85638	-1.44764	0.645809	-2.24159	0.0249881	0.0933211	CRC_vs_HC
hsa-miR-103a-3p.iso.t5:0.seed:0.t3:ga.ad:TG.mm:0	0.0843079	-0.723806	2.58661	-0.279828	0.779609		CRC_vs_HC
hsa-miR-103a-3p.iso.t5:0.seed:0.t3:ga.ad:TT.mm:0	4.25453	-0.639327	0.281678	-2.26971	0.0232253	0.088356	CRC_vs_HC
hsa-miR-103a-3p.iso.t5:0.seed:0.t3:ga.ad:TTA.mm:0	0.120285	-0.805284	2.48358	-0.324243	0.745754		CRC_vs_HC
hsa-miR-103a-3p.iso.t5:0.seed:0.t3:ga.ad:TTT.mm:0	0.418906	-0.470503	0.702379	-0.669871	0.50294	0.705908	CRC_vs_HC
hsa-miR-103a-3p.iso.t5:0.seed:0.t3:tga.ad:0.mm:0	78.6742	-0.0300796	0.143934	-0.208982	0.834463	0.912551	CRC_vs_HC
hsa-miR-103a-3p.iso.t5:0.seed:0.t3:tga.ad:A.mm:0	9.42493	-0.0256192	0.219576	-0.116676	0.907117	0.954265	CRC_vs_HC
hsa-miR-103a-3p.iso.t5:0.seed:0.t3:tga.ad:AA.mm:0	5.32051	0.359996	0.261752	1.37533	0.169028	0.360509	CRC_vs_HC
hsa-miR-103a-3p.iso.t5:0.seed:0.t3:tga.ad:AAA.mm:0	0.919029	0.617417	0.530022	1.16489	0.244063	0.453704	CRC_vs_HC
hsa-miR-103a-3p.iso.t5:0.seed:0.t3:tga.ad:AAG.mm:0	0.160543	0.1166	1.83135	0.0636689	0.949234		CRC_vs_HC
hsa-miR-103a-3p.iso.t5:0.seed:0.t3:tga.ad:AAT.mm:0	0.571271	-0.188507	0.62139	-0.303363	0.761613	0.879361	CRC_vs_HC
hsa-miR-103a-3p.iso.t5:0.seed:0.t3:tga.ad:ACA.mm:0	0.0423705	-0.279265	3.81637	-0.0731756	0.941666		CRC_vs_HC
hsa-miR-103a-3p.iso.t5:0.seed:0.t3:tga.ad:AG.mm:0	0.558724	0.513715	0.546833	0.939436	0.347507	0.563688	CRC_vs_HC
hsa-miR-103a-3p.iso.t5:0.seed:0.t3:tga.ad:AGA.mm:0	1.52496	0.241574	0.332409	0.726737	0.467387	0.674706	CRC_vs_HC
hsa-miR-103a-3p.iso.t5:0.seed:0.t3:tga.ad:AGT.mm:0	0.376481	1.08296	0.684092	1.58306	0.113409		CRC_vs_HC
hsa-miR-103a-3p.iso.t5:0.seed:0.t3:tga.ad:AT.mm:0	2.69473	-0.0630552	0.302016	-0.208781	0.834619	0.912551	CRC_vs_HC
hsa-miR-103a-3p.iso.t5:0.seed:0.t3:tga.ad:ATA.mm:0	0.101998	-0.754393	2.22104	-0.339657	0.734115		CRC_vs_HC
hsa-miR-103a-3p.iso.t5:0.seed:0.t3:tga.ad:ATT.mm:0	0.115089	-0.622495	1.78323	-0.349082	0.727028		CRC_vs_HC
hsa-miR-103a-3p.iso.t5:0.seed:0.t3:tga.ad:C.mm:0	0.16878	-0.473673	1.07254	-0.441637	0.658752		CRC_vs_HC
hsa-miR-103a-3p.iso.t5:0.seed:0.t3:tga.ad:CA.mm:0	0.147232	-0.307875	1.23174	-0.249952	0.802625		CRC_vs_HC
hsa-miR-103a-3p.iso.t5:0.seed:0.t3:tga.ad:CAA.mm:0	0.0708481	-1.00938	3.58501	-0.281555	0.778285		CRC_vs_HC
hsa-miR-103a-3p.iso.t5:0.seed:0.t3:tga.ad:CG.mm:0	0.0723735	-1.18305	3.57749	-0.330694	0.740876		CRC_vs_HC
hsa-miR-103a-3p.iso.t5:0.seed:0.t3:tga.ad:CGA.mm:0	0.538188	-0.440215	0.647213	-0.68017	0.496397	0.700774	CRC_vs_HC
hsa-miR-103a-3p.iso.t5:0.seed:0.t3:tga.ad:CGT.mm:0	0.101169	-0.186405	1.99067	-0.0936395	0.925396		CRC_vs_HC
hsa-miR-103a-3p.iso.t5:0.seed:0.t3:tga.ad:CT.mm:0	0.222234	-0.749149	1.11296	-0.673113	0.500875		CRC_vs_HC
hsa-miR-103a-3p.iso.t5:0.seed:0.t3:tga.ad:G.mm:0	0.794798	-0.760384	0.504656	-1.50674	0.131878	0.306392	CRC_vs_HC
hsa-miR-103a-3p.iso.t5:0.seed:0.t3:tga.ad:GA.mm:0	1.41416	-0.0991934	0.37544	-0.264205	0.791622	0.897514	CRC_vs_HC
hsa-miR-103a-3p.iso.t5:0.seed:0.t3:tga.ad:GAA.mm:0	0.134905	-0.214943	1.449	-0.148339	0.882075		CRC_vs_HC
hsa-miR-103a-3p.iso.t5:0.seed:0.t3:tga.ad:GCT.mm:0	0.0696167	-1.0587	3.81643	-0.277405	0.781469		CRC_vs_HC
hsa-miR-103a-3p.iso.t5:0.seed:0.t3:tga.ad:GG.mm:0	0.617228	0.68144	0.527453	1.29195	0.196376	0.395902	CRC_vs_HC
hsa-miR-103a-3p.iso.t5:0.seed:0.t3:tga.ad:GGA.mm:0	0.713961	-0.736065	0.520379	-1.41448	0.157221	0.344325	CRC_vs_HC
hsa-miR-103a-3p.iso.t5:0.seed:0.t3:tga.ad:GGT.mm:0	0.183031	-0.742334	1.13516	-0.653948	0.513145		CRC_vs_HC
hsa-miR-103a-3p.iso.t5:0.seed:0.t3:tga.ad:GT.mm:0	0.636981	-0.35598	0.560067	-0.635603	0.525035	0.722974	CRC_vs_HC
hsa-miR-103a-3p.iso.t5:0.seed:0.t3:tga.ad:GTA.mm:0	0.0490481	-0.515825	3.81643	-0.135159	0.892486		CRC_vs_HC
hsa-miR-103a-3p.iso.t5:a.seed:0.t3:0.ad:0.mm:0	0.301299	0.602885	0.82205	0.733392	0.463319		CRC_vs_HC
hsa-miR-103a-3p.iso.t5:A.seed:0.t3:0.ad:0.mm:0	0.466743	0.499021	0.81132	0.615072	0.538507	0.732467	CRC_vs_HC
hsa-miR-103a-3p.iso.t5:A.seed:0.t3:a.ad:T.mm:0	0.114134	-0.954671	2.19793	-0.43435	0.664034		CRC_vs_HC
hsa-miR-103a-3p.iso.t5:A.seed:0.t3:ga.ad:0.mm:0	0.0606113	-0.674349	3.07948	-0.218981	0.826665		CRC_vs_HC
hsa-miR-103a-3p.iso.t5:ag.seed:0.t3:0.ad:0.mm:0	25.9154	0.195762	0.181472	1.07874	0.280702	0.496697	CRC_vs_HC
hsa-miR-103a-3p.iso.t5:ag.seed:0.t3:0.ad:T.mm:0	1.11329	0.487337	0.480634	1.01395	0.310609	0.531012	CRC_vs_HC
hsa-miR-103a-3p.iso.t5:ag.seed:0.t3:0.ad:TT.mm:0	0.0594801	-1.08347	3.0796	-0.351821	0.724973		CRC_vs_HC
hsa-miR-103a-3p.iso.t5:ag.seed:0.t3:a.ad:0.mm:0	1.72876	-0.216165	0.342786	-0.630611	0.528295	0.725307	CRC_vs_HC
hsa-miR-103a-3p.iso.t5:ag.seed:0.t3:A.ad:0.mm:0	1.68348	0.183818	0.354533	0.518478	0.604125	0.778918	CRC_vs_HC
hsa-miR-103a-3p.iso.t5:ag.seed:0.t3:a.ad:C.mm:0	0.142445	-1.06368	2.15115	-0.494472	0.620973		CRC_vs_HC
hsa-miR-103a-3p.iso.t5:ag.seed:0.t3:a.ad:T.mm:0	1.65005	0.291324	0.350988	0.830011	0.406533	0.619107	CRC_vs_HC
hsa-miR-103a-3p.iso.t5:ag.seed:0.t3:A.ad:T.mm:0	0.158126	-0.411812	1.33549	-0.308361	0.757808		CRC_vs_HC
hsa-miR-103a-3p.iso.t5:ag.seed:0.t3:a.ad:TT.mm:0	0.186567	0.515106	1.06664	0.482923	0.629151		CRC_vs_HC
hsa-miR-103a-3p.iso.t5:ag.seed:0.t3:AA.ad:0.mm:0	0.516299	0.0483152	0.646493	0.0747342	0.940426	0.969608	CRC_vs_HC
hsa-miR-103a-3p.iso.t5:ag.seed:0.t3:ga.ad:0.mm:0	0.323435	0.0886381	0.768295	0.11537	0.908152		CRC_vs_HC
hsa-miR-103a-3p.iso.t5:ag.seed:0.t3:ga.ad:AA.mm:0	0.0607176	-0.78056	2.64035	-0.295627	0.767515		CRC_vs_HC
hsa-miR-103a-3p.iso.t5:ag.seed:0.t3:ga.ad:T.mm:0	0.0837563	-0.900553	2.96084	-0.304155	0.76101		CRC_vs_HC
hsa-miR-103a-3p.iso.t5:ag.seed:0.t3:tga.ad:0.mm:0	0.329598	0.31923	1.03034	0.309829	0.756691		CRC_vs_HC
hsa-miR-103a-3p.iso.t5:agc.seed:0.t3:0.ad:0.mm:0	2.98394	-0.206512	0.316795	-0.65188	0.514478	0.714348	CRC_vs_HC
hsa-miR-103a-3p.iso.t5:agc.seed:0.t3:0.ad:T.mm:0	0.293414	-0.543667	0.838217	-0.6486	0.516597		CRC_vs_HC
hsa-miR-103a-3p.iso.t5:agc.seed:0.t3:a.ad:0.mm:0	0.49343	0.467204	0.776988	0.601301	0.54764	0.737751	CRC_vs_HC
hsa-miR-103a-3p.iso.t5:agc.seed:0.t3:a.ad:T.mm:0	0.738594	0.142732	0.629135	0.22687	0.820525	0.905281	CRC_vs_HC
hsa-miR-103a-3p.iso.t5:agc.seed:0.t3:a.ad:TA.mm:0	0.0578637	-1.04573	3.67508	-0.284545	0.775993		CRC_vs_HC
hsa-miR-103a-3p.iso.t5:agc.seed:0.t3:a.ad:TT.mm:0	0.0870505	-0.914612	2.547	-0.359094	0.719525		CRC_vs_HC
hsa-miR-103a-3p.iso.t5:agc.seed:0.t3:ga.ad:0.mm:0	0.405698	-0.161797	0.7446	-0.217294	0.827979	0.909262	CRC_vs_HC
hsa-miR-103a-3p.ref.t5:0.seed:0.t3:0.ad:0.mm:0	3759.18	-0.104401	0.0856765	-1.21855	0.223014	0.428164	CRC_vs_HC
hsa-miR-105-3p.iso.t5:0.seed:0.t3:a.ad:0.mm:0	0.0680545	-0.126477	3.81447	-0.0331571	0.973549		CRC_vs_HC
hsa-miR-105-3p.iso.t5:CC.seed:0.t3:a.ad:0.mm:0	0.0593541	-0.0114381	3.81465	-0.00299846	0.997608		CRC_vs_HC
hsa-miR-105-3p.iso.t5:CC.seed:0.t3:cta.ad:T.mm:0	0.0159895	-0.520173	3.81643	-0.136298	0.891586		CRC_vs_HC
hsa-miR-105-5p.iso.t5:0.seed:0.t3:0.ad:A.mm:0	0.0145236	-0.557814	3.81642	-0.146161	0.883794		CRC_vs_HC
hsa-miR-105-5p.iso.t5:0.seed:0.t3:G.ad:T.mm:0	0.0402672	-0.445957	3.8158	-0.116871	0.906962		CRC_vs_HC
hsa-miR-105-5p.iso.t5:0.seed:0.t3:gt.ad:0.mm:0	0.0448305	-0.156457	3.81536	-0.0410072	0.96729		CRC_vs_HC
hsa-miR-105-5p.iso.t5:t.seed:0.t3:0.ad:A.mm:0	0.00968238	-0.661652	3.81647	-0.173368	0.862362		CRC_vs_HC
hsa-miR-105-5p.iso.t5:tc.seed:0.t3:0.ad:0.mm:0	0.0532531	-0.0556468	3.81496	-0.0145865	0.988362		CRC_vs_HC
hsa-miR-105-5p.iso.t5:tc.seed:0.t3:G.ad:0.mm:0	0.204339	0.923629	3.80676	0.242629	0.808293		CRC_vs_HC
hsa-miR-105-5p.iso.t5:tc.seed:0.t3:G.ad:A.mm:0	0.0277482	-0.451975	3.81635	-0.118431	0.905726		CRC_vs_HC
hsa-miR-105-5p.iso.t5:tc.seed:0.t3:G.ad:T.mm:0	0.0611389	-0.0682696	3.81492	-0.0178954	0.985722		CRC_vs_HC
hsa-miR-105-5p.iso.t5:tca.seed:0.t3:G.ad:0.mm:0	0.0352869	-0.552789	3.81631	-0.144849	0.88483		CRC_vs_HC
hsa-miR-105-5p.ref.t5:0.seed:0.t3:0.ad:0.mm:0	0.342057	1.19462	1.73178	0.689821	0.490306		CRC_vs_HC
hsa-miR-106a-3p.iso.t5:A.seed:0.t3:c.ad:0.mm:0	0.043129	-0.546536	3.81644	-0.143206	0.886128		CRC_vs_HC
hsa-miR-106a-3p.iso.t5:A.seed:0.t3:tac.ad:0.mm:0	0.0391821	-0.500158	3.81642	-0.131054	0.895733		CRC_vs_HC
hsa-miR-106a-3p.iso.t5:TA.seed:0.t3:tac.ad:0.mm:0	0.0354952	-0.613861	3.81641	-0.160848	0.872213		CRC_vs_HC
hsa-miR-106a-5p.iso.t5:0.seed:0.t3:0.ad:A.mm:0	1.80253	-1.11562	0.635403	-1.75577	0.0791282	0.215366	CRC_vs_HC
hsa-miR-106a-5p.iso.t5:0.seed:0.t3:0.ad:AA.mm:0	0.129056	-0.701125	1.75973	-0.398428	0.690315		CRC_vs_HC
hsa-miR-106a-5p.iso.t5:0.seed:0.t3:0.ad:AAT.mm:0	0.0778709	-1.22015	3.81619	-0.31973	0.749173		CRC_vs_HC
hsa-miR-106a-5p.iso.t5:0.seed:0.t3:0.ad:T.mm:0	4.21957	-0.891957	0.521871	-1.70915	0.0874227	0.231018	CRC_vs_HC
hsa-miR-106a-5p.iso.t5:0.seed:0.t3:ag.ad:0.mm:0	1.84737	0.287072	0.472316	0.607797	0.543322	0.735223	CRC_vs_HC
hsa-miR-106a-5p.iso.t5:0.seed:0.t3:ag.ad:T.mm:0	0.0515971	-0.758199	3.74661	-0.202369	0.839628		CRC_vs_HC
hsa-miR-106a-5p.iso.t5:0.seed:0.t3:g.ad:0.mm:0	2.23069	-0.258261	0.50416	-0.512259	0.60847	0.781224	CRC_vs_HC
hsa-miR-106a-5p.iso.t5:0.seed:0.t3:g.ad:A.mm:0	0.350365	-0.488275	0.835719	-0.584257	0.559047		CRC_vs_HC
hsa-miR-106a-5p.iso.t5:0.seed:0.t3:g.ad:T.mm:0	0.800643	0.223195	0.711926	0.313508	0.753895	0.875272	CRC_vs_HC
hsa-miR-106a-5p.iso.t5:0.seed:0.t3:tag.ad:0.mm:0	0.41084	0.186497	0.82913	0.224931	0.822033	0.906215	CRC_vs_HC
hsa-miR-106a-5p.iso.t5:0.seed:0.t3:tag.ad:CAG.mm:0	0.0444252	-0.338948	3.80709	-0.0890307	0.929058		CRC_vs_HC
hsa-miR-106a-5p.iso.t5:0.seed:0.t3:tag.ad:GA.mm:0	0.0487606	-1.1749	3.81622	-0.30787	0.758181		CRC_vs_HC
hsa-miR-106a-5p.iso.t5:0.seed:0.t3:tag.ad:GAG.mm:0	0.0672524	-0.818199	3.0399	-0.269153	0.787812		CRC_vs_HC
hsa-miR-106a-5p.iso.t5:a.seed:0.t3:0.ad:0.mm:0	2.5691	0.810556	0.41145	1.97	0.0488383	0.152548	CRC_vs_HC
hsa-miR-106a-5p.iso.t5:a.seed:0.t3:0.ad:A.mm:0	0.215392	-0.600035	0.823552	-0.728594	0.46625		CRC_vs_HC
hsa-miR-106a-5p.iso.t5:a.seed:0.t3:ag.ad:0.mm:0	0.169814	-0.829921	1.17529	-0.706139	0.480102		CRC_vs_HC
hsa-miR-106a-5p.iso.t5:a.seed:0.t3:C.ad:0.mm:0	0.332535	1.21775	1.46276	0.832502	0.405126		CRC_vs_HC
hsa-miR-106a-5p.iso.t5:a.seed:0.t3:CT.ad:0.mm:0	0.036262	-0.478654	3.81629	-0.125424	0.900188		CRC_vs_HC
hsa-miR-106a-5p.iso.t5:a.seed:0.t3:g.ad:0.mm:0	0.164358	-0.507409	1.17445	-0.432041	0.665712		CRC_vs_HC
hsa-miR-106a-5p.iso.t5:a.seed:0.t3:g.ad:T.mm:0	0.0648998	-0.495664	3.05816	-0.162079	0.871244		CRC_vs_HC
hsa-miR-106a-5p.ref.t5:0.seed:0.t3:0.ad:0.mm:0	18.2966	-0.239986	0.473272	-0.507079	0.612099	0.783939	CRC_vs_HC
hsa-miR-106b-3p.iso.t5:0.seed:0.t3:0.ad:A.mm:0	7.85226	-0.0801915	0.234079	-0.342583	0.731912	0.864064	CRC_vs_HC
hsa-miR-106b-3p.iso.t5:0.seed:0.t3:0.ad:AA.mm:0	3.4843	0.25398	0.407283	0.623597	0.532892	0.72818	CRC_vs_HC
hsa-miR-106b-3p.iso.t5:0.seed:0.t3:0.ad:AAA.mm:0	0.187583	-0.255974	1.13692	-0.225146	0.821866		CRC_vs_HC
hsa-miR-106b-3p.iso.t5:0.seed:0.t3:0.ad:AAT.mm:0	0.247466	-1.45903	0.891599	-1.63642	0.101753		CRC_vs_HC
hsa-miR-106b-3p.iso.t5:0.seed:0.t3:0.ad:ACT.mm:0	0.0299167	-0.468019	3.81644	-0.122632	0.902398		CRC_vs_HC
hsa-miR-106b-3p.iso.t5:0.seed:0.t3:0.ad:AG.mm:0	0.727117	0.371042	0.5292	0.701138	0.483217	0.689726	CRC_vs_HC
hsa-miR-106b-3p.iso.t5:0.seed:0.t3:0.ad:AGA.mm:0	0.180782	-0.987937	2.10464	-0.469408	0.638778		CRC_vs_HC
hsa-miR-106b-3p.iso.t5:0.seed:0.t3:0.ad:AGG.mm:0	0.0264828	-0.928772	3.81633	-0.243368	0.807721		CRC_vs_HC
hsa-miR-106b-3p.iso.t5:0.seed:0.t3:0.ad:AGT.mm:0	0.181644	-1.07623	1.33947	-0.803478	0.421699		CRC_vs_HC
hsa-miR-106b-3p.iso.t5:0.seed:0.t3:0.ad:AT.mm:0	3.24035	-0.112419	0.36456	-0.308368	0.757802	0.877566	CRC_vs_HC
hsa-miR-106b-3p.iso.t5:0.seed:0.t3:0.ad:ATT.mm:0	0.304025	-0.0291314	0.731138	-0.039844	0.968218		CRC_vs_HC
hsa-miR-106b-3p.iso.t5:0.seed:0.t3:0.ad:G.mm:0	0.246423	-0.00692222	1.17779	-0.00587731	0.995311		CRC_vs_HC
hsa-miR-106b-3p.iso.t5:0.seed:0.t3:0.ad:GA.mm:0	0.0723424	-1.28802	3.816	-0.337532	0.735716		CRC_vs_HC
hsa-miR-106b-3p.iso.t5:0.seed:0.t3:c.ad:0.mm:0	31.5867	0.436789	0.181812	2.40242	0.0162869	0.0682802	CRC_vs_HC
hsa-miR-106b-3p.iso.t5:0.seed:0.t3:c.ad:A.mm:0	7.6616	-0.0020458	0.221481	-0.0092369	0.99263	0.995947	CRC_vs_HC
hsa-miR-106b-3p.iso.t5:0.seed:0.t3:c.ad:AA.mm:0	1.73754	0.366846	0.34412	1.06604	0.286405	0.503737	CRC_vs_HC
hsa-miR-106b-3p.iso.t5:0.seed:0.t3:c.ad:AAA.mm:0	1.45767	0.658161	0.433933	1.51673	0.129334	0.302236	CRC_vs_HC
hsa-miR-106b-3p.iso.t5:0.seed:0.t3:c.ad:AAT.mm:0	0.0937262	-0.536319	1.79411	-0.298933	0.764991		CRC_vs_HC
hsa-miR-106b-3p.iso.t5:0.seed:0.t3:c.ad:AG.mm:0	0.276803	-0.828895	0.897687	-0.923368	0.355816		CRC_vs_HC
hsa-miR-106b-3p.iso.t5:0.seed:0.t3:c.ad:AGA.mm:0	0.19312	-0.348568	0.960971	-0.362725	0.716811		CRC_vs_HC
hsa-miR-106b-3p.iso.t5:0.seed:0.t3:c.ad:AT.mm:0	0.419265	-0.618286	0.700002	-0.883263	0.377094	0.592734	CRC_vs_HC
hsa-miR-106b-3p.iso.t5:0.seed:0.t3:c.ad:T.mm:0	15.1686	-0.1523	0.191944	-0.793457	0.427512	0.63758	CRC_vs_HC
hsa-miR-106b-3p.iso.t5:0.seed:0.t3:c.ad:TA.mm:0	0.180495	-1.06316	1.16605	-0.911766	0.361892		CRC_vs_HC
hsa-miR-106b-3p.iso.t5:0.seed:0.t3:c.ad:TAA.mm:0	0.220531	-1.01498	1.01162	-1.00332	0.315708		CRC_vs_HC
hsa-miR-106b-3p.iso.t5:0.seed:0.t3:c.ad:TAG.mm:0	0.131713	-0.882699	1.75157	-0.503946	0.614299		CRC_vs_HC
hsa-miR-106b-3p.iso.t5:0.seed:0.t3:c.ad:TT.mm:0	1.00953	-0.427074	0.473962	-0.901073	0.36755	0.583429	CRC_vs_HC
hsa-miR-106b-3p.iso.t5:0.seed:0.t3:gc.ad:0.mm:0	171.661	-0.116428	0.175224	-0.664452	0.506401	0.708265	CRC_vs_HC
hsa-miR-106b-3p.iso.t5:0.seed:0.t3:gc.ad:A.mm:0	0.739048	0.070151	0.490386	0.143053	0.886249	0.942953	CRC_vs_HC
hsa-miR-106b-3p.iso.t5:0.seed:0.t3:gc.ad:AA.mm:0	0.260719	-0.600374	0.97564	-0.615365	0.538314		CRC_vs_HC
hsa-miR-106b-3p.iso.t5:0.seed:0.t3:gc.ad:AAA.mm:0	0.193862	-0.980709	1.56466	-0.626788	0.530798		CRC_vs_HC
hsa-miR-106b-3p.iso.t5:0.seed:0.t3:gc.ad:AAG.mm:0	0.150859	-0.876259	1.91705	-0.457089	0.647607		CRC_vs_HC
hsa-miR-106b-3p.iso.t5:0.seed:0.t3:gc.ad:AGA.mm:0	0.061347	0.0743501	2.64985	0.0280583	0.977616		CRC_vs_HC
hsa-miR-106b-3p.iso.t5:0.seed:0.t3:gc.ad:T.mm:0	1.78989	-0.416022	0.368065	-1.1303	0.258351	0.469999	CRC_vs_HC
hsa-miR-106b-3p.iso.t5:0.seed:0.t3:gc.ad:TAA.mm:0	0.0776131	-0.852475	3.81634	-0.223375	0.823244		CRC_vs_HC
hsa-miR-106b-3p.iso.t5:0.seed:0.t3:gc.ad:TT.mm:0	0.152329	-1.10935	1.74893	-0.634304	0.525882		CRC_vs_HC
hsa-miR-106b-3p.iso.t5:0.seed:0.t3:T.ad:0.mm:0	11.5785	0.0122188	0.211807	0.0576885	0.953997	0.976679	CRC_vs_HC
hsa-miR-106b-3p.iso.t5:0.seed:0.t3:T.ad:A.mm:0	0.18391	-0.756564	1.24949	-0.605497	0.544849		CRC_vs_HC
hsa-miR-106b-3p.iso.t5:0.seed:0.t3:T.ad:AT.mm:0	0.0574518	-0.273022	3.67714	-0.0742487	0.940813		CRC_vs_HC
hsa-miR-106b-3p.iso.t5:0.seed:0.t3:T.ad:G.mm:0	0.205389	-0.732131	3.81644	-0.191836	0.84787		CRC_vs_HC
hsa-miR-106b-3p.iso.t5:0.seed:0.t3:T.ad:T.mm:0	1.07666	-0.282186	0.549554	-0.513482	0.607614	0.781048	CRC_vs_HC
hsa-miR-106b-3p.iso.t5:0.seed:0.t3:T.ad:TT.mm:0	0.113525	-0.30302	1.95861	-0.154712	0.877049		CRC_vs_HC
hsa-miR-106b-3p.iso.t5:0.seed:0.t3:tgc.ad:0.mm:0	5.2682	0.0341366	0.236408	0.144397	0.885187	0.9422	CRC_vs_HC
hsa-miR-106b-3p.iso.t5:0.seed:0.t3:tgc.ad:A.mm:0	1.6898	0.256643	0.440239	0.582963	0.559918	0.746465	CRC_vs_HC
hsa-miR-106b-3p.iso.t5:0.seed:0.t3:tgc.ad:AA.mm:0	0.123441	-0.531087	2.85556	-0.185984	0.852457		CRC_vs_HC
hsa-miR-106b-3p.iso.t5:0.seed:0.t3:tgc.ad:AAA.mm:0	0.121681	-0.271385	1.76488	-0.15377	0.877791		CRC_vs_HC
hsa-miR-106b-3p.iso.t5:0.seed:0.t3:tgc.ad:AG.mm:0	0.0388659	-0.661725	3.81626	-0.173396	0.86234		CRC_vs_HC
hsa-miR-106b-3p.iso.t5:0.seed:0.t3:tgc.ad:C.mm:0	0.104829	-0.524011	2.51687	-0.208199	0.835073		CRC_vs_HC
hsa-miR-106b-3p.iso.t5:0.seed:0.t3:tgc.ad:G.mm:0	0.50417	0.0162688	0.758375	0.0214522	0.982885	0.99205	CRC_vs_HC
hsa-miR-106b-3p.iso.t5:0.seed:0.t3:tgc.ad:GG.mm:0	0.0465659	-0.385035	3.78058	-0.101846	0.918879		CRC_vs_HC
hsa-miR-106b-3p.iso.t5:A.seed:0.t3:0.ad:0.mm:0	0.456175	0.443217	0.645665	0.686451	0.492429	0.697807	CRC_vs_HC
hsa-miR-106b-3p.iso.t5:A.seed:0.t3:c.ad:0.mm:0	1.62419	-0.191884	0.393468	-0.487674	0.625781	0.793551	CRC_vs_HC
hsa-miR-106b-3p.iso.t5:A.seed:0.t3:c.ad:A.mm:0	0.17367	-0.823905	1.11822	-0.736802	0.461243		CRC_vs_HC
hsa-miR-106b-3p.iso.t5:A.seed:0.t3:c.ad:T.mm:0	0.104263	-1.15526	2.91246	-0.396662	0.691617		CRC_vs_HC
hsa-miR-106b-3p.iso.t5:A.seed:0.t3:c.ad:TG.mm:0	0.0142053	0	3.81646	0	1		CRC_vs_HC
hsa-miR-106b-3p.iso.t5:A.seed:0.t3:gc.ad:0.mm:0	10.7619	-0.466782	0.204134	-2.28664	0.0222169	0.0854706	CRC_vs_HC
hsa-miR-106b-3p.iso.t5:A.seed:0.t3:gc.ad:T.mm:0	0.133511	-1.04402	1.59349	-0.655178	0.512353		CRC_vs_HC
hsa-miR-106b-3p.iso.t5:A.seed:0.t3:tgc.ad:0.mm:0	0.584632	0.0167259	0.641675	0.026066	0.979205	0.990503	CRC_vs_HC
hsa-miR-106b-3p.iso.t5:A.seed:0.t3:tgc.ad:A.mm:0	0.127716	-1.47045	1.94292	-0.756826	0.449154		CRC_vs_HC
hsa-miR-106b-3p.iso.t5:A.seed:0.t3:tgc.ad:C.mm:0	0.0329946	-0.674656	3.81643	-0.176777	0.859684		CRC_vs_HC
hsa-miR-106b-3p.iso.t5:c.seed:0.t3:0.ad:0.mm:0	0.0438288	-0.688251	3.81644	-0.180339	0.856887		CRC_vs_HC
hsa-miR-106b-3p.iso.t5:c.seed:0.t3:gc.ad:0.mm:0	0.126879	-0.232212	2.19855	-0.105621	0.915883		CRC_vs_HC
hsa-miR-106b-3p.iso.t5:cc.seed:0.t3:gc.ad:0.mm:0	0.14774	-0.321411	2.45296	-0.13103	0.895752		CRC_vs_HC
hsa-miR-106b-3p.iso.t5:CTA.seed:0.t3:gc.ad:0.mm:0	0.0478117	-0.818299	3.81641	-0.214416	0.830223		CRC_vs_HC
hsa-miR-106b-3p.iso.t5:TA.seed:0.t3:0.ad:0.mm:0	0.577515	0.880551	0.611938	1.43895	0.150164	0.334563	CRC_vs_HC
hsa-miR-106b-3p.iso.t5:TA.seed:0.t3:c.ad:0.mm:0	0.17794	-1.28719	1.24254	-1.03593	0.300233		CRC_vs_HC
hsa-miR-106b-3p.iso.t5:TA.seed:0.t3:c.ad:A.mm:0	0.0407532	-0.95631	3.81635	-0.250582	0.802137		CRC_vs_HC
hsa-miR-106b-3p.iso.t5:TA.seed:0.t3:c.ad:T.mm:0	0.180019	0.0127019	1.11841	0.0113571	0.990939		CRC_vs_HC
hsa-miR-106b-3p.iso.t5:TA.seed:0.t3:gc.ad:0.mm:0	165.535	-0.0910567	0.140098	-0.64995	0.515725	0.714976	CRC_vs_HC
hsa-miR-106b-3p.iso.t5:TA.seed:0.t3:gc.ad:A.mm:0	0.552136	-0.271396	0.592723	-0.457879	0.647039	0.809024	CRC_vs_HC
hsa-miR-106b-3p.iso.t5:TA.seed:0.t3:gc.ad:AAA.mm:0	0.0704623	-0.749838	3.58825	-0.208971	0.834471		CRC_vs_HC
hsa-miR-106b-3p.iso.t5:TA.seed:0.t3:gc.ad:C.mm:0	0.0558501	-1.12395	3.81622	-0.29452	0.768361		CRC_vs_HC
hsa-miR-106b-3p.iso.t5:TA.seed:0.t3:gc.ad:T.mm:0	1.17743	0.098578	0.45143	0.218368	0.827142	0.908696	CRC_vs_HC
hsa-miR-106b-3p.iso.t5:TA.seed:0.t3:tgc.ad:0.mm:0	3.55352	0.414432	0.281248	1.47355	0.140603	0.319991	CRC_vs_HC
hsa-miR-106b-3p.iso.t5:TA.seed:0.t3:tgc.ad:A.mm:0	1.7279	0.691879	0.354483	1.9518	0.0509622	0.157149	CRC_vs_HC
hsa-miR-106b-3p.iso.t5:TA.seed:0.t3:tgc.ad:G.mm:0	0.511772	0.585342	0.660307	0.88647	0.375364	0.591157	CRC_vs_HC
hsa-miR-106b-3p.ref.t5:0.seed:0.t3:0.ad:0.mm:0	6.98256	0.253436	0.292069	0.867724	0.385546	0.600688	CRC_vs_HC
hsa-miR-106b-5p.iso.t5:0.seed:0.t3:0.ad:C.mm:0	0.350577	-0.484708	0.67463	-0.71848	0.472462		CRC_vs_HC
hsa-miR-106b-5p.iso.t5:0.seed:0.t3:0.ad:G.mm:0	3.57921	-0.0453413	0.29782	-0.152244	0.878994	0.938845	CRC_vs_HC
hsa-miR-106b-5p.iso.t5:0.seed:0.t3:0.ad:GA.mm:0	0.445447	-0.0831147	0.612359	-0.135729	0.892036	0.946043	CRC_vs_HC
hsa-miR-106b-5p.iso.t5:0.seed:0.t3:0.ad:GAG.mm:0	0.101727	0	3.81646	0	1		CRC_vs_HC
hsa-miR-106b-5p.iso.t5:0.seed:0.t3:0.ad:GT.mm:0	0.33324	0.41884	1.04639	0.400272	0.688956		CRC_vs_HC
hsa-miR-106b-5p.iso.t5:0.seed:0.t3:0.ad:T.mm:0	15.7876	0.0993403	0.181883	0.546178	0.584944	0.765477	CRC_vs_HC
hsa-miR-106b-5p.iso.t5:0.seed:0.t3:0.ad:TT.mm:0	0.423208	0.049826	0.642205	0.0775859	0.938157	0.969012	CRC_vs_HC
hsa-miR-106b-5p.iso.t5:0.seed:0.t3:A.ad:0.mm:0	116.189	0.609373	0.211744	2.87787	0.00400366	0.0233019	CRC_vs_HC
hsa-miR-106b-5p.iso.t5:0.seed:0.t3:A.ad:A.mm:0	6.4131	0.438986	0.253571	1.73122	0.0834131	0.223871	CRC_vs_HC
hsa-miR-106b-5p.iso.t5:0.seed:0.t3:A.ad:AA.mm:0	0.307678	0.36472	0.689498	0.528964	0.59683		CRC_vs_HC
hsa-miR-106b-5p.iso.t5:0.seed:0.t3:A.ad:AG.mm:0	0.155342	-0.844574	1.94295	-0.434686	0.66379		CRC_vs_HC
hsa-miR-106b-5p.iso.t5:0.seed:0.t3:A.ad:AT.mm:0	0.189322	-0.2664	1.06458	-0.250239	0.802402		CRC_vs_HC
hsa-miR-106b-5p.iso.t5:0.seed:0.t3:A.ad:C.mm:0	0.23506	-0.736063	1.17835	-0.624657	0.532196		CRC_vs_HC
hsa-miR-106b-5p.iso.t5:0.seed:0.t3:A.ad:T.mm:0	3.45169	0.369864	0.313184	1.18098	0.237611	0.446078	CRC_vs_HC
hsa-miR-106b-5p.iso.t5:0.seed:0.t3:A.ad:TT.mm:0	0.26578	0.290474	0.731814	0.396923	0.691424		CRC_vs_HC
hsa-miR-106b-5p.iso.t5:0.seed:0.t3:AG.ad:0.mm:0	4.87945	0.193872	0.243958	0.794695	0.426791	0.636945	CRC_vs_HC
hsa-miR-106b-5p.iso.t5:0.seed:0.t3:AG.ad:A.mm:0	0.487791	0.227201	0.635467	0.357533	0.720693	0.856809	CRC_vs_HC
hsa-miR-106b-5p.iso.t5:0.seed:0.t3:AGT.ad:0.mm:0	3.80047	0.74621	0.290424	2.56938	0.0101881	0.0481054	CRC_vs_HC
hsa-miR-106b-5p.iso.t5:0.seed:0.t3:at.ad:0.mm:0	15.3583	0.06325	0.189983	0.332925	0.739191	0.868008	CRC_vs_HC
hsa-miR-106b-5p.iso.t5:0.seed:0.t3:at.ad:C.mm:0	0.628657	-1.40096	0.996928	-1.40528	0.159938	0.3483	CRC_vs_HC
hsa-miR-106b-5p.iso.t5:0.seed:0.t3:at.ad:CA.mm:0	0.0231698	-0.90283	3.81622	-0.236577	0.812985		CRC_vs_HC
hsa-miR-106b-5p.iso.t5:0.seed:0.t3:at.ad:CAA.mm:0	0.0240772	-1.00613	3.81623	-0.263644	0.792055		CRC_vs_HC
hsa-miR-106b-5p.iso.t5:0.seed:0.t3:at.ad:CAT.mm:0	0.0117	-0.91615	3.81638	-0.240058	0.810286		CRC_vs_HC
hsa-miR-106b-5p.iso.t5:0.seed:0.t3:at.ad:CT.mm:0	3.31123	-1.22115	0.821593	-1.48632	0.137194	0.314219	CRC_vs_HC
hsa-miR-106b-5p.iso.t5:0.seed:0.t3:at.ad:CTA.mm:0	1.0951	-1.05045	0.803065	-1.30805	0.190856	0.389129	CRC_vs_HC
hsa-miR-106b-5p.iso.t5:0.seed:0.t3:at.ad:CTG.mm:0	0.0800177	-0.745007	3.5111	-0.212187	0.831961		CRC_vs_HC
hsa-miR-106b-5p.iso.t5:0.seed:0.t3:at.ad:CTT.mm:0	0.132729	-0.643172	3.30982	-0.194323	0.845923		CRC_vs_HC
hsa-miR-106b-5p.iso.t5:0.seed:0.t3:at.ad:G.mm:0	0.283609	-1.04785	1.07141	-0.978006	0.328071		CRC_vs_HC
hsa-miR-106b-5p.iso.t5:0.seed:0.t3:at.ad:GT.mm:0	0.170881	-0.608066	1.35069	-0.45019	0.652573		CRC_vs_HC
hsa-miR-106b-5p.iso.t5:0.seed:0.t3:at.ad:T.mm:0	1.21271	-0.214938	0.448452	-0.479289	0.631733	0.797916	CRC_vs_HC
hsa-miR-106b-5p.iso.t5:0.seed:0.t3:at.ad:TT.mm:0	0.121993	-0.657425	1.75421	-0.37477	0.707832		CRC_vs_HC
hsa-miR-106b-5p.iso.t5:0.seed:0.t3:gat.ad:0.mm:0	3.60245	0.175454	0.341294	0.514085	0.607192	0.780791	CRC_vs_HC
hsa-miR-106b-5p.iso.t5:0.seed:0.t3:gat.ad:A.mm:0	0.266197	-1.22234	1.0754	-1.13664	0.255689		CRC_vs_HC
hsa-miR-106b-5p.iso.t5:0.seed:0.t3:gat.ad:AA.mm:0	0.133718	-1.32434	1.75533	-0.754464	0.450571		CRC_vs_HC
hsa-miR-106b-5p.iso.t5:0.seed:0.t3:gat.ad:TA.mm:0	0.106172	-0.824434	2.2248	-0.370565	0.710962		CRC_vs_HC
hsa-miR-106b-5p.iso.t5:0.seed:0.t3:gat.ad:TAT.mm:0	0.484575	-1.56202	0.712244	-2.1931	0.0283001	0.102365	CRC_vs_HC
hsa-miR-106b-5p.iso.t5:0.seed:0.t3:t.ad:0.mm:0	105.491	-0.00846335	0.156266	-0.05416	0.956808	0.978537	CRC_vs_HC
hsa-miR-106b-5p.iso.t5:0.seed:0.t3:t.ad:A.mm:0	3.82751	0.210435	0.31273	0.672897	0.501013	0.704429	CRC_vs_HC
hsa-miR-106b-5p.iso.t5:0.seed:0.t3:t.ad:AA.mm:0	3.14994	0.0261128	0.392733	0.0664898	0.946988	0.973653	CRC_vs_HC
hsa-miR-106b-5p.iso.t5:0.seed:0.t3:t.ad:AAA.mm:0	0.168806	-0.470458	1.22939	-0.382675	0.701961		CRC_vs_HC
hsa-miR-106b-5p.iso.t5:0.seed:0.t3:t.ad:AAT.mm:0	0.0607361	-0.762156	3.81627	-0.199712	0.841706		CRC_vs_HC
hsa-miR-106b-5p.iso.t5:0.seed:0.t3:t.ad:AC.mm:0	1.1299	0.169039	0.451171	0.374668	0.707908	0.848892	CRC_vs_HC
hsa-miR-106b-5p.iso.t5:0.seed:0.t3:t.ad:AG.mm:0	0.322552	-0.568333	0.662105	-0.858373	0.390686		CRC_vs_HC
hsa-miR-106b-5p.iso.t5:0.seed:0.t3:t.ad:AGT.mm:0	0.0537527	-0.994621	3.81633	-0.260623	0.794384		CRC_vs_HC
hsa-miR-106b-5p.iso.t5:0.seed:0.t3:t.ad:AT.mm:0	0.61009	-0.542313	0.538672	-1.00676	0.31405	0.533436	CRC_vs_HC
hsa-miR-106b-5p.iso.t5:0.seed:0.t3:t.ad:G.mm:0	0.289676	-0.246005	1.0925	-0.225177	0.821842		CRC_vs_HC
hsa-miR-106b-5p.iso.t5:0.seed:0.t3:t.ad:GA.mm:0	0.370794	-0.348042	0.802097	-0.433915	0.66435		CRC_vs_HC
hsa-miR-106b-5p.iso.t5:0.seed:0.t3:t.ad:GT.mm:0	0.0182949	0	3.81644	0	1		CRC_vs_HC
hsa-miR-106b-5p.iso.t5:t.seed:0.t3:A.ad:0.mm:0	0.0309941	-0.665154	3.81643	-0.174287	0.86164		CRC_vs_HC
hsa-miR-106b-5p.ref.t5:0.seed:0.t3:0.ad:0.mm:0	301.074	0.334803	0.13574	2.46649	0.0136443	0.0593909	CRC_vs_HC
hsa-miR-107.iso.t5:0.seed:0.t3:0.ad:G.mm:0	0.454166	0.0437789	0.745581	0.0587178	0.953177	0.976302	CRC_vs_HC
hsa-miR-107.iso.t5:0.seed:0.t3:0.ad:GA.mm:0	0.164427	-1.37544	2.42689	-0.566751	0.570884		CRC_vs_HC
hsa-miR-107.iso.t5:0.seed:0.t3:0.ad:GT.mm:0	0.243551	-1.03791	0.825744	-1.25694	0.208774		CRC_vs_HC
hsa-miR-107.iso.t5:0.seed:0.t3:0.ad:T.mm:0	2.11213	-0.546047	0.425055	-1.28465	0.198915	0.399307	CRC_vs_HC
hsa-miR-107.iso.t5:0.seed:0.t3:0.ad:TT.mm:0	0.287438	-0.763174	1.01452	-0.752254	0.451898		CRC_vs_HC
hsa-miR-107.iso.t5:0.seed:0.t3:a.ad:0.mm:0	259.94	-0.118135	0.172735	-0.683909	0.494033	0.699437	CRC_vs_HC
hsa-miR-107.iso.t5:0.seed:0.t3:A.ad:0.mm:0	6.42579	-0.365264	0.276772	-1.31973	0.186925	0.38445	CRC_vs_HC
hsa-miR-107.iso.t5:0.seed:0.t3:a.ad:C.mm:0	0.236523	-0.112175	1.16431	-0.0963443	0.923247		CRC_vs_HC
hsa-miR-107.iso.t5:0.seed:0.t3:a.ad:G.mm:0	1.40285	-0.0044462	0.420271	-0.0105794	0.991559	0.99553	CRC_vs_HC
hsa-miR-107.iso.t5:0.seed:0.t3:a.ad:GA.mm:0	0.342618	-1.45525	0.807003	-1.80328	0.0713443		CRC_vs_HC
hsa-miR-107.iso.t5:0.seed:0.t3:a.ad:T.mm:0	119.555	-0.27197	0.216187	-1.25803	0.208381	0.411224	CRC_vs_HC
hsa-miR-107.iso.t5:0.seed:0.t3:A.ad:T.mm:0	0.384074	0.0518911	0.817063	0.0635094	0.949361		CRC_vs_HC
hsa-miR-107.iso.t5:0.seed:0.t3:a.ad:TA.mm:0	0.212435	0.0793229	1.06689	0.0743499	0.940732		CRC_vs_HC
hsa-miR-107.iso.t5:0.seed:0.t3:a.ad:TT.mm:0	0.466277	0.113565	0.688725	0.164891	0.86903	0.933924	CRC_vs_HC
hsa-miR-107.iso.t5:0.seed:0.t3:AA.ad:0.mm:0	0.234275	-0.216136	0.83008	-0.260379	0.794571		CRC_vs_HC
hsa-miR-107.iso.t5:0.seed:0.t3:ca.ad:0.mm:0	459.939	-0.139314	0.122092	-1.14106	0.253845	0.465326	CRC_vs_HC
hsa-miR-107.iso.t5:0.seed:0.t3:ca.ad:A.mm:0	39.3482	0.0101668	0.125011	0.0813268	0.935182	0.967446	CRC_vs_HC
hsa-miR-107.iso.t5:0.seed:0.t3:ca.ad:AA.mm:0	40.8618	0.027649	0.163084	0.169539	0.865373	0.932142	CRC_vs_HC
hsa-miR-107.iso.t5:0.seed:0.t3:ca.ad:AAA.mm:0	1.28452	0.0910678	0.40158	0.226774	0.8206	0.905281	CRC_vs_HC
hsa-miR-107.iso.t5:0.seed:0.t3:ca.ad:AAG.mm:0	0.213106	-0.911249	1.2368	-0.736781	0.461256		CRC_vs_HC
hsa-miR-107.iso.t5:0.seed:0.t3:ca.ad:AAT.mm:0	2.0173	-0.244421	0.389176	-0.628049	0.529972	0.726212	CRC_vs_HC
hsa-miR-107.iso.t5:0.seed:0.t3:ca.ad:AC.mm:0	0.0866941	-0.688133	2.55482	-0.269347	0.787663		CRC_vs_HC
hsa-miR-107.iso.t5:0.seed:0.t3:ca.ad:ACT.mm:0	0.144488	-1.47715	2.15368	-0.685871	0.492794		CRC_vs_HC
hsa-miR-107.iso.t5:0.seed:0.t3:ca.ad:AG.mm:0	1.69773	0.105539	0.35837	0.294498	0.768377	0.883846	CRC_vs_HC
hsa-miR-107.iso.t5:0.seed:0.t3:ca.ad:AGA.mm:0	0.78232	-0.0376952	0.49837	-0.075637	0.939708	0.969608	CRC_vs_HC
hsa-miR-107.iso.t5:0.seed:0.t3:ca.ad:AGC.mm:0	0.0383223	-0.229833	3.81627	-0.0602246	0.951977		CRC_vs_HC
hsa-miR-107.iso.t5:0.seed:0.t3:ca.ad:AGT.mm:0	0.576155	-0.00783466	0.630402	-0.012428	0.990084	0.994734	CRC_vs_HC
hsa-miR-107.iso.t5:0.seed:0.t3:ca.ad:AT.mm:0	6.28312	0.00187054	0.247159	0.00756816	0.993962	0.996636	CRC_vs_HC
hsa-miR-107.iso.t5:0.seed:0.t3:ca.ad:ATA.mm:0	0.25114	-1.59705	1.03673	-1.54046	0.123448		CRC_vs_HC
hsa-miR-107.iso.t5:0.seed:0.t3:ca.ad:ATT.mm:0	0.346026	-0.144604	0.684106	-0.211377	0.832593		CRC_vs_HC
hsa-miR-107.iso.t5:0.seed:0.t3:ca.ad:T.mm:0	83.575	0.0534147	0.127302	0.41959	0.674785	0.827807	CRC_vs_HC
hsa-miR-107.iso.t5:0.seed:0.t3:ca.ad:TA.mm:0	4.45575	-0.869803	0.293707	-2.96146	0.00306182	0.0188131	CRC_vs_HC
hsa-miR-107.iso.t5:0.seed:0.t3:ca.ad:TAA.mm:0	0.309872	-0.405796	0.81347	-0.498846	0.617888		CRC_vs_HC
hsa-miR-107.iso.t5:0.seed:0.t3:ca.ad:TAT.mm:0	0.85638	-1.44764	0.645809	-2.24159	0.0249881	0.0933211	CRC_vs_HC
hsa-miR-107.iso.t5:0.seed:0.t3:ca.ad:TG.mm:0	0.0843079	-0.723806	2.58661	-0.279828	0.779609		CRC_vs_HC
hsa-miR-107.iso.t5:0.seed:0.t3:ca.ad:TT.mm:0	4.25453	-0.639327	0.281678	-2.26971	0.0232253	0.088356	CRC_vs_HC
hsa-miR-107.iso.t5:0.seed:0.t3:ca.ad:TTA.mm:0	0.120285	-0.805284	2.48358	-0.324243	0.745754		CRC_vs_HC
hsa-miR-107.iso.t5:0.seed:0.t3:ca.ad:TTT.mm:0	0.418906	-0.470503	0.702379	-0.669871	0.50294	0.705908	CRC_vs_HC
hsa-miR-107.iso.t5:0.seed:0.t3:tca.ad:0.mm:0	78.6742	-0.0300796	0.143934	-0.208982	0.834463	0.912551	CRC_vs_HC
hsa-miR-107.iso.t5:0.seed:0.t3:tca.ad:A.mm:0	9.42493	-0.0256192	0.219576	-0.116676	0.907117	0.954265	CRC_vs_HC
hsa-miR-107.iso.t5:0.seed:0.t3:tca.ad:AA.mm:0	5.32051	0.359996	0.261752	1.37533	0.169028	0.360509	CRC_vs_HC
hsa-miR-107.iso.t5:0.seed:0.t3:tca.ad:AAA.mm:0	0.919029	0.617417	0.530022	1.16489	0.244063	0.453704	CRC_vs_HC
hsa-miR-107.iso.t5:0.seed:0.t3:tca.ad:AAG.mm:0	0.160543	0.1166	1.83135	0.0636689	0.949234		CRC_vs_HC
hsa-miR-107.iso.t5:0.seed:0.t3:tca.ad:AAT.mm:0	0.571271	-0.188507	0.62139	-0.303363	0.761613	0.879361	CRC_vs_HC
hsa-miR-107.iso.t5:0.seed:0.t3:tca.ad:ACA.mm:0	0.0423705	-0.279265	3.81637	-0.0731756	0.941666		CRC_vs_HC
hsa-miR-107.iso.t5:0.seed:0.t3:tca.ad:AG.mm:0	0.558724	0.513715	0.546833	0.939436	0.347507	0.563688	CRC_vs_HC
hsa-miR-107.iso.t5:0.seed:0.t3:tca.ad:AGA.mm:0	1.52496	0.241574	0.332409	0.726737	0.467387	0.674706	CRC_vs_HC
hsa-miR-107.iso.t5:0.seed:0.t3:tca.ad:AGT.mm:0	0.376481	1.08296	0.684092	1.58306	0.113409		CRC_vs_HC
hsa-miR-107.iso.t5:0.seed:0.t3:tca.ad:AT.mm:0	2.69473	-0.0630552	0.302016	-0.208781	0.834619	0.912551	CRC_vs_HC
hsa-miR-107.iso.t5:0.seed:0.t3:tca.ad:ATA.mm:0	0.101998	-0.754393	2.22104	-0.339657	0.734115		CRC_vs_HC
hsa-miR-107.iso.t5:0.seed:0.t3:tca.ad:ATT.mm:0	0.115089	-0.622495	1.78323	-0.349082	0.727028		CRC_vs_HC
hsa-miR-107.iso.t5:0.seed:0.t3:tca.ad:C.mm:0	0.16878	-0.473673	1.07254	-0.441637	0.658752		CRC_vs_HC
hsa-miR-107.iso.t5:0.seed:0.t3:tca.ad:CA.mm:0	0.147232	-0.307875	1.23174	-0.249952	0.802625		CRC_vs_HC
hsa-miR-107.iso.t5:0.seed:0.t3:tca.ad:CAA.mm:0	0.0708481	-1.00938	3.58501	-0.281555	0.778285		CRC_vs_HC
hsa-miR-107.iso.t5:0.seed:0.t3:tca.ad:CG.mm:0	0.0723735	-1.18305	3.57749	-0.330694	0.740876		CRC_vs_HC
hsa-miR-107.iso.t5:0.seed:0.t3:tca.ad:CGA.mm:0	0.538188	-0.440215	0.647213	-0.68017	0.496397	0.700774	CRC_vs_HC
hsa-miR-107.iso.t5:0.seed:0.t3:tca.ad:CGT.mm:0	0.101169	-0.186405	1.99067	-0.0936395	0.925396		CRC_vs_HC
hsa-miR-107.iso.t5:0.seed:0.t3:tca.ad:CT.mm:0	0.222234	-0.749149	1.11296	-0.673113	0.500875		CRC_vs_HC
hsa-miR-107.iso.t5:0.seed:0.t3:tca.ad:G.mm:0	0.794798	-0.760384	0.504656	-1.50674	0.131878	0.306392	CRC_vs_HC
hsa-miR-107.iso.t5:0.seed:0.t3:tca.ad:GA.mm:0	1.41416	-0.0991934	0.37544	-0.264205	0.791622	0.897514	CRC_vs_HC
hsa-miR-107.iso.t5:0.seed:0.t3:tca.ad:GAA.mm:0	0.134905	-0.214943	1.449	-0.148339	0.882075		CRC_vs_HC
hsa-miR-107.iso.t5:0.seed:0.t3:tca.ad:GCT.mm:0	0.0696167	-1.0587	3.81643	-0.277405	0.781469		CRC_vs_HC
hsa-miR-107.iso.t5:0.seed:0.t3:tca.ad:GG.mm:0	0.617228	0.68144	0.527453	1.29195	0.196376	0.395902	CRC_vs_HC
hsa-miR-107.iso.t5:0.seed:0.t3:tca.ad:GGA.mm:0	0.713961	-0.736065	0.520379	-1.41448	0.157221	0.344325	CRC_vs_HC
hsa-miR-107.iso.t5:0.seed:0.t3:tca.ad:GGT.mm:0	0.183031	-0.742334	1.13516	-0.653948	0.513145		CRC_vs_HC
hsa-miR-107.iso.t5:0.seed:0.t3:tca.ad:GT.mm:0	0.636981	-0.35598	0.560067	-0.635603	0.525035	0.722974	CRC_vs_HC
hsa-miR-107.iso.t5:0.seed:0.t3:tca.ad:GTA.mm:0	0.0490481	-0.515825	3.81643	-0.135159	0.892486		CRC_vs_HC
hsa-miR-107.iso.t5:A.seed:0.t3:ca.ad:0.mm:0	0.0606113	-0.674349	3.07948	-0.218981	0.826665		CRC_vs_HC
hsa-miR-107.iso.t5:ag.seed:0.t3:ca.ad:0.mm:0	0.323435	0.0886381	0.768295	0.11537	0.908152		CRC_vs_HC
hsa-miR-107.iso.t5:ag.seed:0.t3:ca.ad:AA.mm:0	0.0607176	-0.78056	2.64035	-0.295627	0.767515		CRC_vs_HC
hsa-miR-107.iso.t5:ag.seed:0.t3:ca.ad:T.mm:0	0.0837563	-0.900553	2.96084	-0.304155	0.76101		CRC_vs_HC
hsa-miR-107.iso.t5:ag.seed:0.t3:tca.ad:0.mm:0	0.329598	0.31923	1.03034	0.309829	0.756691		CRC_vs_HC
hsa-miR-107.iso.t5:agc.seed:0.t3:0.ad:0.mm:0	0.0634933	-0.363167	3.07841	-0.117972	0.90609		CRC_vs_HC
hsa-miR-107.iso.t5:agc.seed:0.t3:a.ad:0.mm:0	0.28564	-1.08864	1.04486	-1.0419	0.29746		CRC_vs_HC
hsa-miR-107.iso.t5:agc.seed:0.t3:a.ad:T.mm:0	0.0429072	-0.843771	3.81643	-0.221089	0.825023		CRC_vs_HC
hsa-miR-107.iso.t5:agc.seed:0.t3:ca.ad:0.mm:0	0.405698	-0.161797	0.7446	-0.217294	0.827979	0.909262	CRC_vs_HC
hsa-miR-107.ref.t5:0.seed:0.t3:0.ad:0.mm:0	54.7411	-0.149786	0.225328	-0.664747	0.506212	0.708238	CRC_vs_HC
hsa-miR-10a-3p.iso.t5:0.seed:0.t3:0.ad:A.mm:0	0.173627	-0.45444	1.26193	-0.360114	0.718762		CRC_vs_HC
hsa-miR-10a-3p.iso.t5:0.seed:0.t3:a.ad:0.mm:0	102.185	0.78693	0.196191	4.01104	6.04526e-05	0.000759665	CRC_vs_HC
hsa-miR-10a-3p.iso.t5:0.seed:0.t3:a.ad:GCC.mm:0	0.00968238	-0.661652	3.81647	-0.173368	0.862362		CRC_vs_HC
hsa-miR-10a-3p.iso.t5:0.seed:0.t3:a.ad:T.mm:0	12.8464	0.397732	0.218979	1.81631	0.0693235	0.19578	CRC_vs_HC
hsa-miR-10a-3p.iso.t5:0.seed:0.t3:a.ad:TT.mm:0	0.520185	0.730416	0.640583	1.14024	0.254188	0.465796	CRC_vs_HC
hsa-miR-10a-3p.iso.t5:0.seed:0.t3:ata.ad:0.mm:0	5.29683	0.272123	0.247848	1.09794	0.272231	0.487131	CRC_vs_HC
hsa-miR-10a-3p.iso.t5:0.seed:0.t3:ata.ad:CA.mm:0	0.0302463	-0.9288	3.81619	-0.243384	0.807708		CRC_vs_HC
hsa-miR-10a-3p.iso.t5:0.seed:0.t3:ata.ad:CT.mm:0	0.941966	-0.821226	0.916002	-0.896533	0.369968	0.585706	CRC_vs_HC
hsa-miR-10a-3p.iso.t5:0.seed:0.t3:ata.ad:CTA.mm:0	0.0337498	-1.07344	3.81625	-0.281282	0.778494		CRC_vs_HC
hsa-miR-10a-3p.iso.t5:0.seed:0.t3:ata.ad:CTT.mm:0	0.101587	-1.03801	2.8838	-0.359944	0.718889		CRC_vs_HC
hsa-miR-10a-3p.iso.t5:0.seed:0.t3:ata.ad:GA.mm:0	0.0121864	-1.03145	3.8164	-0.270268	0.786954		CRC_vs_HC
hsa-miR-10a-3p.iso.t5:0.seed:0.t3:ata.ad:GT.mm:0	0.0535658	-0.908476	3.81644	-0.238043	0.811848		CRC_vs_HC
hsa-miR-10a-3p.iso.t5:0.seed:0.t3:ata.ad:T.mm:0	1.04894	-0.496601	0.483585	-1.02691	0.304461	0.523816	CRC_vs_HC
hsa-miR-10a-3p.iso.t5:0.seed:0.t3:ata.ad:TA.mm:0	0.0198599	-0.529431	3.81641	-0.138725	0.889668		CRC_vs_HC
hsa-miR-10a-3p.iso.t5:0.seed:0.t3:ata.ad:TT.mm:0	2.54212	0.468781	0.348661	1.34452	0.178781	0.374252	CRC_vs_HC
hsa-miR-10a-3p.iso.t5:0.seed:0.t3:ata.ad:TTT.mm:0	0.0606036	-0.383046	2.65361	-0.144349	0.885225		CRC_vs_HC
hsa-miR-10a-3p.iso.t5:0.seed:0.t3:ta.ad:0.mm:0	5.74448	0.524862	0.24056	2.18184	0.0291214	0.104117	CRC_vs_HC
hsa-miR-10a-3p.iso.t5:0.seed:0.t3:ta.ad:A.mm:0	3.84475	0.174435	0.255654	0.682307	0.495045	0.699679	CRC_vs_HC
hsa-miR-10a-3p.iso.t5:0.seed:0.t3:ta.ad:AA.mm:0	0.434483	0.34549	0.680245	0.507891	0.61153	0.783721	CRC_vs_HC
hsa-miR-10a-3p.iso.t5:0.seed:0.t3:ta.ad:AAA.mm:0	0.0579045	-1.03048	3.67578	-0.280344	0.779214		CRC_vs_HC
hsa-miR-10a-3p.iso.t5:0.seed:0.t3:ta.ad:G.mm:0	0.102573	-0.217366	2.22299	-0.0977808	0.922106		CRC_vs_HC
hsa-miR-10a-3p.iso.t5:A.seed:0.t3:a.ad:0.mm:0	0.816352	1.26875	0.5042	2.51636	0.0118574	0.053664	CRC_vs_HC
hsa-miR-10a-3p.iso.t5:A.seed:0.t3:a.ad:T.mm:0	0.179307	-0.176806	1.15462	-0.153129	0.878296		CRC_vs_HC
hsa-miR-10a-3p.iso.t5:A.seed:0.t3:ata.ad:0.mm:0	0.155573	0.16042	1.1812	0.135811	0.89197		CRC_vs_HC
hsa-miR-10a-3p.iso.t5:A.seed:0.t3:ata.ad:TT.mm:0	0.147356	-0.300403	2.18401	-0.137547	0.890599		CRC_vs_HC
hsa-miR-10a-3p.iso.t5:A.seed:0.t3:ta.ad:A.mm:0	0.201016	-0.326109	1.02999	-0.316614	0.751537		CRC_vs_HC
hsa-miR-10a-3p.iso.t5:c.seed:0.t3:0.ad:0.mm:0	4.43089	1.69218	0.32796	5.15973	2.47305e-07	7.1087e-06	CRC_vs_HC
hsa-miR-10a-3p.iso.t5:c.seed:0.t3:0.ad:A.mm:0	0.127265	0.126161	1.4684	0.0859173	0.931532		CRC_vs_HC
hsa-miR-10a-3p.iso.t5:c.seed:0.t3:a.ad:0.mm:0	9.67546	1.04401	0.234251	4.45683	8.31822e-06	0.000140255	CRC_vs_HC
hsa-miR-10a-3p.iso.t5:c.seed:0.t3:a.ad:T.mm:0	0.292952	0.212222	0.749636	0.2831	0.7771		CRC_vs_HC
hsa-miR-10a-3p.iso.t5:c.seed:0.t3:ata.ad:0.mm:0	0.311164	0.449025	0.691889	0.648984	0.516349		CRC_vs_HC
hsa-miR-10a-3p.iso.t5:c.seed:0.t3:T.ad:A.mm:0	0.0386987	-1.04492	3.81619	-0.273812	0.784229		CRC_vs_HC
hsa-miR-10a-3p.iso.t5:c.seed:0.t3:T.ad:T.mm:0	0.0423021	-0.441484	3.81645	-0.115679	0.907907		CRC_vs_HC
hsa-miR-10a-3p.iso.t5:c.seed:0.t3:ta.ad:0.mm:0	0.432465	0.434358	0.635623	0.683359	0.49438	0.699654	CRC_vs_HC
hsa-miR-10a-3p.iso.t5:c.seed:0.t3:ta.ad:A.mm:0	0.350602	-0.0522819	0.75165	-0.0695561	0.944547		CRC_vs_HC
hsa-miR-10a-3p.iso.t5:ca.seed:0.t3:0.ad:0.mm:0	0.0419508	-0.473091	3.81634	-0.123964	0.901343		CRC_vs_HC
hsa-miR-10a-3p.iso.t5:ca.seed:0.t3:a.ad:0.mm:0	0.152271	0.251049	1.45494	0.17255	0.863005		CRC_vs_HC
hsa-miR-10a-3p.iso.t5:CA.seed:0.t3:a.ad:0.mm:0	0.375757	0.81538	0.769656	1.05941	0.289414		CRC_vs_HC
hsa-miR-10a-3p.iso.t5:CA.seed:0.t3:ata.ad:0.mm:0	0.326259	1.39606	0.691958	2.01756	0.0436374		CRC_vs_HC
hsa-miR-10a-3p.iso.t5:CA.seed:0.t3:ata.ad:CT.mm:0	0.012202	-0.681556	3.81647	-0.178583	0.858265		CRC_vs_HC
hsa-miR-10a-3p.iso.t5:CA.seed:0.t3:ata.ad:T.mm:0	0.09035	-0.369879	2.9646	-0.124765	0.900709		CRC_vs_HC
hsa-miR-10a-3p.iso.t5:ca.seed:0.t3:T.ad:A.mm:0	0.0205534	-0.478065	3.81644	-0.125265	0.900314		CRC_vs_HC
hsa-miR-10a-3p.iso.t5:CA.seed:0.t3:ta.ad:0.mm:0	0.283141	0.990135	0.954647	1.03717	0.299655		CRC_vs_HC
hsa-miR-10a-3p.iso.t5:ca.seed:0.t3:ta.ad:A.mm:0	0.0285014	-1.1822	3.81621	-0.309782	0.756726		CRC_vs_HC
hsa-miR-10a-3p.iso.t5:TCA.seed:0.t3:ata.ad:0.mm:0	0.443924	0.223521	0.71269	0.313631	0.753802	0.875272	CRC_vs_HC
hsa-miR-10a-3p.iso.t5:TCA.seed:0.t3:ata.ad:T.mm:0	0.142549	0.195191	2.21036	0.0883072	0.929632		CRC_vs_HC
hsa-miR-10a-3p.ref.t5:0.seed:0.t3:0.ad:0.mm:0	4.40459	0.890356	0.26431	3.3686	0.000755504	0.00599963	CRC_vs_HC
hsa-miR-10a-5p.iso.t5:0.seed:0.t3:0.ad:A.mm:0	8351.73	0.171638	0.170018	1.00953	0.312721	0.532567	CRC_vs_HC
hsa-miR-10a-5p.iso.t5:0.seed:0.t3:0.ad:AA.mm:0	278.228	0.375982	0.197849	1.90035	0.0573878	0.170632	CRC_vs_HC
hsa-miR-10a-5p.iso.t5:0.seed:0.t3:0.ad:AAA.mm:0	21.003	0.828835	0.248179	3.33967	0.000838775	0.00658829	CRC_vs_HC
hsa-miR-10a-5p.iso.t5:0.seed:0.t3:0.ad:AAC.mm:0	0.0458515	-0.90128	3.78579	-0.238069	0.811827		CRC_vs_HC
hsa-miR-10a-5p.iso.t5:0.seed:0.t3:0.ad:AAG.mm:0	0.316364	0.789668	0.773084	1.02145	0.307041		CRC_vs_HC
hsa-miR-10a-5p.iso.t5:0.seed:0.t3:0.ad:AAT.mm:0	1.85468	0.260493	0.417024	0.624647	0.532203	0.727514	CRC_vs_HC
hsa-miR-10a-5p.iso.t5:0.seed:0.t3:0.ad:AC.mm:0	1.39175	0.568607	0.410084	1.38656	0.165576	0.355632	CRC_vs_HC
hsa-miR-10a-5p.iso.t5:0.seed:0.t3:0.ad:AG.mm:0	3.23327	0.709119	0.268306	2.64295	0.00821866	0.0406718	CRC_vs_HC
hsa-miR-10a-5p.iso.t5:0.seed:0.t3:0.ad:AGA.mm:0	0.408046	0.209127	0.693924	0.301368	0.763134	0.880533	CRC_vs_HC
hsa-miR-10a-5p.iso.t5:0.seed:0.t3:0.ad:AT.mm:0	17.3887	0.287671	0.223029	1.28984	0.197108	0.396584	CRC_vs_HC
hsa-miR-10a-5p.iso.t5:0.seed:0.t3:0.ad:ATA.mm:0	0.171754	-0.342062	1.16948	-0.29249	0.769912		CRC_vs_HC
hsa-miR-10a-5p.iso.t5:0.seed:0.t3:0.ad:C.mm:0	19.4173	0.502482	0.247604	2.02938	0.0424197	0.137555	CRC_vs_HC
hsa-miR-10a-5p.iso.t5:0.seed:0.t3:0.ad:CA.mm:0	0.553917	0.0845551	0.638683	0.13239	0.894676	0.94782	CRC_vs_HC
hsa-miR-10a-5p.iso.t5:0.seed:0.t3:0.ad:CT.mm:0	0.26886	-1.18631	1.02994	-1.15183	0.249392		CRC_vs_HC
hsa-miR-10a-5p.iso.t5:0.seed:0.t3:0.ad:GT.mm:0	1.94722	0.217161	0.31768	0.683583	0.494239	0.699638	CRC_vs_HC
hsa-miR-10a-5p.iso.t5:0.seed:0.t3:g.ad:0.mm:0	106932	0.36681	0.158678	2.31166	0.0207963	0.0816145	CRC_vs_HC
hsa-miR-10a-5p.iso.t5:0.seed:0.t3:g.ad:A.mm:0	1116.86	-0.00694211	0.161168	-0.0430738	0.965643	0.98327	CRC_vs_HC
hsa-miR-10a-5p.iso.t5:0.seed:0.t3:g.ad:AA.mm:0	313.077	0.0177055	0.178161	0.0993789	0.920837	0.960936	CRC_vs_HC
hsa-miR-10a-5p.iso.t5:0.seed:0.t3:g.ad:AAA.mm:0	9.8229	0.300855	0.23008	1.30761	0.191006	0.389214	CRC_vs_HC
hsa-miR-10a-5p.iso.t5:0.seed:0.t3:g.ad:AAC.mm:0	0.0546351	-0.184581	3.11896	-0.0591805	0.952808		CRC_vs_HC
hsa-miR-10a-5p.iso.t5:0.seed:0.t3:g.ad:AAG.mm:0	0.107295	-0.739611	1.99261	-0.371177	0.710506		CRC_vs_HC
hsa-miR-10a-5p.iso.t5:0.seed:0.t3:g.ad:AAT.mm:0	0.537583	-0.23149	0.586019	-0.395021	0.692828	0.839421	CRC_vs_HC
hsa-miR-10a-5p.iso.t5:0.seed:0.t3:g.ad:AC.mm:0	0.430323	0.949384	0.797865	1.18991	0.234084	0.441763	CRC_vs_HC
hsa-miR-10a-5p.iso.t5:0.seed:0.t3:g.ad:AG.mm:0	5.84661	-0.000626774	0.236659	-0.00264843	0.997887	0.999644	CRC_vs_HC
hsa-miR-10a-5p.iso.t5:0.seed:0.t3:g.ad:AGA.mm:0	0.197134	-0.156581	0.940343	-0.166515	0.867752		CRC_vs_HC
hsa-miR-10a-5p.iso.t5:0.seed:0.t3:g.ad:AGT.mm:0	0.0872	-0.640493	2.56119	-0.250077	0.802528		CRC_vs_HC
hsa-miR-10a-5p.iso.t5:0.seed:0.t3:g.ad:AT.mm:0	25.2134	0.45006	0.20018	2.24828	0.0245586	0.0920669	CRC_vs_HC
hsa-miR-10a-5p.iso.t5:0.seed:0.t3:g.ad:ATA.mm:0	0.112331	-1.16435	1.61247	-0.722092	0.470238		CRC_vs_HC
hsa-miR-10a-5p.iso.t5:0.seed:0.t3:g.ad:C.mm:0	3.447	0.245487	0.304069	0.807341	0.41947	0.630021	CRC_vs_HC
hsa-miR-10a-5p.iso.t5:0.seed:0.t3:g.ad:CA.mm:0	1.52126	1.04132	0.398291	2.61448	0.00893646	0.0434677	CRC_vs_HC
hsa-miR-10a-5p.iso.t5:0.seed:0.t3:g.ad:CAA.mm:0	0.0438512	-0.206158	3.81334	-0.0540623	0.956885		CRC_vs_HC
hsa-miR-10a-5p.iso.t5:0.seed:0.t3:g.ad:CG.mm:0	0.0971805	0.190143	1.78105	0.106759	0.91498		CRC_vs_HC
hsa-miR-10a-5p.iso.t5:0.seed:0.t3:g.ad:CT.mm:0	0.734597	0.990123	0.614983	1.61	0.107398	0.265437	CRC_vs_HC
hsa-miR-10a-5p.iso.t5:0.seed:0.t3:g.ad:T.mm:0	175.809	0.124732	0.18516	0.673647	0.500536	0.704301	CRC_vs_HC
hsa-miR-10a-5p.iso.t5:0.seed:0.t3:g.ad:TA.mm:0	13.7624	-0.924874	0.287613	-3.21569	0.00130133	0.0094142	CRC_vs_HC
hsa-miR-10a-5p.iso.t5:0.seed:0.t3:g.ad:TAA.mm:0	0.485189	0.215147	0.701172	0.306839	0.758966	0.877937	CRC_vs_HC
hsa-miR-10a-5p.iso.t5:0.seed:0.t3:g.ad:TAT.mm:0	0.240188	-0.594109	0.975775	-0.608859	0.542618		CRC_vs_HC
hsa-miR-10a-5p.iso.t5:0.seed:0.t3:g.ad:TG.mm:0	1.10596	-0.897772	0.511522	-1.7551	0.0792422	0.215622	CRC_vs_HC
hsa-miR-10a-5p.iso.t5:0.seed:0.t3:g.ad:TGT.mm:0	0.082107	-0.488695	3.81631	-0.128054	0.898106		CRC_vs_HC
hsa-miR-10a-5p.iso.t5:0.seed:0.t3:g.ad:TT.mm:0	8.12309	-1.14624	0.38465	-2.97997	0.00288279	0.0178962	CRC_vs_HC
hsa-miR-10a-5p.iso.t5:0.seed:0.t3:g.ad:TTT.mm:0	0.205203	-0.277037	1.07673	-0.257294	0.796952		CRC_vs_HC
hsa-miR-10a-5p.iso.t5:0.seed:0.t3:gtg.ad:0.mm:0	1787.59	0.193899	0.189544	1.02298	0.306319	0.525757	CRC_vs_HC
hsa-miR-10a-5p.iso.t5:0.seed:0.t3:gtg.ad:A.mm:0	28.4432	-0.273384	0.217543	-1.25669	0.208866	0.411639	CRC_vs_HC
hsa-miR-10a-5p.iso.t5:0.seed:0.t3:gtg.ad:AA.mm:0	5.11985	-0.575082	0.2556	-2.24993	0.0244536	0.0917369	CRC_vs_HC
hsa-miR-10a-5p.iso.t5:0.seed:0.t3:gtg.ad:AAA.mm:0	0.539987	-0.41731	0.679475	-0.614165	0.539106	0.733005	CRC_vs_HC
hsa-miR-10a-5p.iso.t5:0.seed:0.t3:gtg.ad:AAT.mm:0	0.127884	-0.948956	2.85404	-0.332495	0.739515		CRC_vs_HC
hsa-miR-10a-5p.iso.t5:0.seed:0.t3:gtg.ad:AGG.mm:0	0.0229774	-0.651517	3.81647	-0.170712	0.86445		CRC_vs_HC
hsa-miR-10a-5p.iso.t5:0.seed:0.t3:gtg.ad:AT.mm:0	27.3943	1.3407	0.260439	5.14785	2.63492e-07	7.41621e-06	CRC_vs_HC
hsa-miR-10a-5p.iso.t5:0.seed:0.t3:gtg.ad:ATA.mm:0	0.619847	0.733927	0.67806	1.08239	0.279078	0.494715	CRC_vs_HC
hsa-miR-10a-5p.iso.t5:0.seed:0.t3:gtg.ad:ATG.mm:0	12.0461	1.07249	0.270964	3.95807	7.55581e-05	0.000908379	CRC_vs_HC
hsa-miR-10a-5p.iso.t5:0.seed:0.t3:gtg.ad:ATT.mm:0	0.0877398	-0.785829	2.56839	-0.305962	0.759633		CRC_vs_HC
hsa-miR-10a-5p.iso.t5:0.seed:0.t3:gtg.ad:C.mm:0	0.369479	0.0615264	0.758272	0.0811402	0.93533		CRC_vs_HC
hsa-miR-10a-5p.iso.t5:0.seed:0.t3:gtg.ad:CA.mm:0	0.161903	-0.834381	1.35271	-0.616823	0.537351		CRC_vs_HC
hsa-miR-10a-5p.iso.t5:0.seed:0.t3:gtg.ad:CAA.mm:0	0.0281558	-0.945053	3.81633	-0.247634	0.804418		CRC_vs_HC
hsa-miR-10a-5p.iso.t5:0.seed:0.t3:gtg.ad:CT.mm:0	23.9643	-0.196358	0.302887	-0.648289	0.516798	0.716004	CRC_vs_HC
hsa-miR-10a-5p.iso.t5:0.seed:0.t3:gtg.ad:CTA.mm:0	0.344636	-1.41131	0.82175	-1.71744	0.0858989		CRC_vs_HC
hsa-miR-10a-5p.iso.t5:0.seed:0.t3:gtg.ad:CTG.mm:0	4.92675	0.220451	0.28563	0.771808	0.440228	0.649998	CRC_vs_HC
hsa-miR-10a-5p.iso.t5:0.seed:0.t3:gtg.ad:CTT.mm:0	0.086785	-1.15908	2.97921	-0.389056	0.697235		CRC_vs_HC
hsa-miR-10a-5p.iso.t5:0.seed:0.t3:gtg.ad:T.mm:0	10.4291	0.0975692	0.217208	0.449197	0.65329	0.812871	CRC_vs_HC
hsa-miR-10a-5p.iso.t5:0.seed:0.t3:gtg.ad:TA.mm:0	0.222639	-0.531162	1.11183	-0.477738	0.632837		CRC_vs_HC
hsa-miR-10a-5p.iso.t5:0.seed:0.t3:gtg.ad:TAA.mm:0	0.159011	-0.819947	1.61826	-0.506685	0.612376		CRC_vs_HC
hsa-miR-10a-5p.iso.t5:0.seed:0.t3:gtg.ad:TG.mm:0	0.374438	0.24668	0.789778	0.312341	0.754781		CRC_vs_HC
hsa-miR-10a-5p.iso.t5:0.seed:0.t3:gtg.ad:TGA.mm:0	1.57893	0.356836	0.402452	0.886654	0.375265	0.591148	CRC_vs_HC
hsa-miR-10a-5p.iso.t5:0.seed:0.t3:gtg.ad:TGT.mm:0	3.15297	0.536141	0.304971	1.75801	0.0787461	0.214813	CRC_vs_HC
hsa-miR-10a-5p.iso.t5:0.seed:0.t3:gtg.ad:TT.mm:0	57.5496	0.17614	0.257783	0.68329	0.494424	0.699654	CRC_vs_HC
hsa-miR-10a-5p.iso.t5:0.seed:0.t3:gtg.ad:TTA.mm:0	0.245324	-0.902453	0.741974	-1.21629	0.223876		CRC_vs_HC
hsa-miR-10a-5p.iso.t5:0.seed:0.t3:gtg.ad:TTG.mm:0	12.632	0.427429	0.236442	1.80775	0.0706447	0.198629	CRC_vs_HC
hsa-miR-10a-5p.iso.t5:0.seed:0.t3:gtg.ad:TTT.mm:0	0.728967	0.0548827	0.594225	0.09236	0.926412	0.963404	CRC_vs_HC
hsa-miR-10a-5p.iso.t5:0.seed:0.t3:T.ad:0.mm:0	4288.62	0.344356	0.183482	1.87679	0.0605475	0.177536	CRC_vs_HC
hsa-miR-10a-5p.iso.t5:0.seed:0.t3:T.ad:C.mm:0	0.123495	-1.38947	1.95543	-0.710569	0.477351		CRC_vs_HC
hsa-miR-10a-5p.iso.t5:0.seed:0.t3:T.ad:G.mm:0	2.82637	0.131133	0.319861	0.409971	0.681827	0.831643	CRC_vs_HC
hsa-miR-10a-5p.iso.t5:0.seed:0.t3:T.ad:GA.mm:0	0.0698124	-0.665216	2.61864	-0.254031	0.799472		CRC_vs_HC
hsa-miR-10a-5p.iso.t5:0.seed:0.t3:T.ad:GT.mm:0	0.15293	0.260252	1.14903	0.226497	0.820815		CRC_vs_HC
hsa-miR-10a-5p.iso.t5:0.seed:0.t3:T.ad:T.mm:0	5.24478	0.189538	0.300994	0.629706	0.528887	0.725684	CRC_vs_HC
hsa-miR-10a-5p.iso.t5:0.seed:0.t3:T.ad:TA.mm:0	0.26882	-0.201905	0.83921	-0.240589	0.809874		CRC_vs_HC
hsa-miR-10a-5p.iso.t5:0.seed:0.t3:T.ad:TAA.mm:0	0.0500151	-0.565376	3.81642	-0.148143	0.88223		CRC_vs_HC
hsa-miR-10a-5p.iso.t5:0.seed:0.t3:T.ad:TAT.mm:0	0.0932479	-0.701724	2.24955	-0.31194	0.755086		CRC_vs_HC
hsa-miR-10a-5p.iso.t5:0.seed:0.t3:T.ad:TCT.mm:0	0.0417928	-0.538732	3.81645	-0.141161	0.887743		CRC_vs_HC
hsa-miR-10a-5p.iso.t5:0.seed:0.t3:T.ad:TT.mm:0	0.5326	-0.106391	0.568589	-0.187114	0.851571	0.923774	CRC_vs_HC
hsa-miR-10a-5p.iso.t5:0.seed:0.t3:T.ad:TTT.mm:0	0.213599	-0.90437	1.22834	-0.736254	0.461576		CRC_vs_HC
hsa-miR-10a-5p.iso.t5:0.seed:0.t3:TA.ad:0.mm:0	24.6304	0.337157	0.2176	1.54943	0.121278	0.289929	CRC_vs_HC
hsa-miR-10a-5p.iso.t5:0.seed:0.t3:TA.ad:T.mm:0	1.28077	1.11294	0.518447	2.14667	0.0318194	0.111585	CRC_vs_HC
hsa-miR-10a-5p.iso.t5:0.seed:0.t3:TAA.ad:0.mm:0	7.84403	0.602677	0.258848	2.32831	0.0198959	0.0790278	CRC_vs_HC
hsa-miR-10a-5p.iso.t5:0.seed:0.t3:TAA.ad:A.mm:0	1.07817	2.27128	0.564936	4.02043	5.80921e-05	0.000737791	CRC_vs_HC
hsa-miR-10a-5p.iso.t5:0.seed:0.t3:TAA.ad:AA.mm:0	0.233439	0.888015	0.866485	1.02485	0.305435		CRC_vs_HC
hsa-miR-10a-5p.iso.t5:0.seed:0.t3:TAA.ad:AAA.mm:0	0.195742	0.429478	1.24797	0.344142	0.730739		CRC_vs_HC
hsa-miR-10a-5p.iso.t5:0.seed:0.t3:TAA.ad:T.mm:0	0.0735808	-0.193605	2.28588	-0.084696	0.932503		CRC_vs_HC
hsa-miR-10a-5p.iso.t5:0.seed:0.t3:TAA.ad:TAA.mm:0	0.0474291	-1.27804	3.81594	-0.33492	0.737685		CRC_vs_HC
hsa-miR-10a-5p.iso.t5:0.seed:0.t3:tg.ad:0.mm:0	13822.8	0.179804	0.166544	1.07962	0.280312	0.496287	CRC_vs_HC
hsa-miR-10a-5p.iso.t5:0.seed:0.t3:tg.ad:A.mm:0	894.259	-0.365863	0.198556	-1.84262	0.0653841	0.187695	CRC_vs_HC
hsa-miR-10a-5p.iso.t5:0.seed:0.t3:tg.ad:AA.mm:0	61.4287	-0.69474	0.217992	-3.187	0.00143755	0.0101816	CRC_vs_HC
hsa-miR-10a-5p.iso.t5:0.seed:0.t3:tg.ad:AAA.mm:0	7.9184	-0.557718	0.285407	-1.95411	0.0506877	0.156792	CRC_vs_HC
hsa-miR-10a-5p.iso.t5:0.seed:0.t3:tg.ad:AAG.mm:0	0.169229	-0.165173	1.06135	-0.155625	0.876329		CRC_vs_HC
hsa-miR-10a-5p.iso.t5:0.seed:0.t3:tg.ad:AAT.mm:0	0.342302	-0.263391	0.653817	-0.402852	0.687057		CRC_vs_HC
hsa-miR-10a-5p.iso.t5:0.seed:0.t3:tg.ad:AC.mm:0	0.24685	-0.603736	0.985716	-0.612485	0.540217		CRC_vs_HC
hsa-miR-10a-5p.iso.t5:0.seed:0.t3:tg.ad:AG.mm:0	14.9321	0.849628	0.368084	2.30824	0.0209856	0.0821189	CRC_vs_HC
hsa-miR-10a-5p.iso.t5:0.seed:0.t3:tg.ad:AGA.mm:0	5.47382	0.300481	0.402133	0.747217	0.454932	0.664169	CRC_vs_HC
hsa-miR-10a-5p.iso.t5:0.seed:0.t3:tg.ad:AGG.mm:0	0.973323	0.779277	0.628667	1.23957	0.215134	0.419403	CRC_vs_HC
hsa-miR-10a-5p.iso.t5:0.seed:0.t3:tg.ad:AGT.mm:0	3.46825	0.726864	0.465991	1.55982	0.118802	0.285462	CRC_vs_HC
hsa-miR-10a-5p.iso.t5:0.seed:0.t3:tg.ad:AT.mm:0	1.79633	-0.74114	0.412218	-1.79793	0.0721881	0.201188	CRC_vs_HC
hsa-miR-10a-5p.iso.t5:0.seed:0.t3:tg.ad:C.mm:0	14.5512	0.615414	0.241669	2.54652	0.0108803	0.0504481	CRC_vs_HC
hsa-miR-10a-5p.iso.t5:0.seed:0.t3:tg.ad:CA.mm:0	1.25727	0.160425	0.381436	0.420583	0.67406	0.82721	CRC_vs_HC
hsa-miR-10a-5p.iso.t5:0.seed:0.t3:tg.ad:CG.mm:0	9.81253	0.977386	0.237824	4.1097	3.96171e-05	0.000531179	CRC_vs_HC
hsa-miR-10a-5p.iso.t5:0.seed:0.t3:tg.ad:CGA.mm:0	2.6132	0.983132	0.338994	2.90015	0.0037299	0.0219091	CRC_vs_HC
hsa-miR-10a-5p.iso.t5:0.seed:0.t3:tg.ad:CGG.mm:0	0.294957	0.468683	0.735776	0.636992	0.52413		CRC_vs_HC
hsa-miR-10a-5p.iso.t5:0.seed:0.t3:tg.ad:CGT.mm:0	1.44262	0.834447	0.455336	1.8326	0.0668625	0.190975	CRC_vs_HC
hsa-miR-10a-5p.iso.t5:0.seed:0.t3:tg.ad:GG.mm:0	26.1625	1.21276	0.252873	4.79595	1.61909e-06	3.44847e-05	CRC_vs_HC
hsa-miR-10a-5p.iso.t5:0.seed:0.t3:tg.ad:GGA.mm:0	4.92203	1.03055	0.344047	2.99537	0.00274112	0.0172244	CRC_vs_HC
hsa-miR-10a-5p.iso.t5:0.seed:0.t3:tg.ad:GGG.mm:0	0.504512	0.896309	0.561709	1.59568	0.110559	0.270835	CRC_vs_HC
hsa-miR-10a-5p.iso.t5:0.seed:0.t3:tg.ad:GGT.mm:0	2.31459	1.13044	0.365008	3.09703	0.00195472	0.0131056	CRC_vs_HC
hsa-miR-10a-5p.iso.t5:0.seed:0.t3:tg.ad:GTG.mm:0	0.452762	0.775149	0.640068	1.21104	0.225879	0.431972	CRC_vs_HC
hsa-miR-10a-5p.iso.t5:0.seed:0.t3:tg.ad:GTT.mm:0	0.077382	-1.15238	2.99705	-0.384503	0.700605		CRC_vs_HC
hsa-miR-10a-5p.iso.t5:A.seed:0.t3:0.ad:0.mm:0	75.958	0.824399	0.191001	4.3162	1.58738e-05	0.000244742	CRC_vs_HC
hsa-miR-10a-5p.iso.t5:A.seed:0.t3:0.ad:A.mm:0	6.41137	1.01505	0.297924	3.40708	0.000656624	0.00532392	CRC_vs_HC
hsa-miR-10a-5p.iso.t5:A.seed:0.t3:0.ad:AA.mm:0	0.159503	0.486421	1.77484	0.274064	0.784035		CRC_vs_HC
hsa-miR-10a-5p.iso.t5:A.seed:0.t3:g.ad:0.mm:0	755.704	0.687683	0.149491	4.60015	4.22184e-06	7.84014e-05	CRC_vs_HC
hsa-miR-10a-5p.iso.t5:A.seed:0.t3:g.ad:A.mm:0	2.21932	0.0352872	0.317726	0.111062	0.911567	0.956712	CRC_vs_HC
hsa-miR-10a-5p.iso.t5:A.seed:0.t3:g.ad:AA.mm:0	0.305694	0.920646	0.948945	0.970178	0.331958		CRC_vs_HC
hsa-miR-10a-5p.iso.t5:A.seed:0.t3:g.ad:AT.mm:0	0.0694816	-0.423915	3.61035	-0.117416	0.90653		CRC_vs_HC
hsa-miR-10a-5p.iso.t5:A.seed:0.t3:g.ad:T.mm:0	0.786169	0.630331	0.478308	1.31783	0.187559	0.385091	CRC_vs_HC
hsa-miR-10a-5p.iso.t5:A.seed:0.t3:gtg.ad:0.mm:0	57.9948	0.172357	0.189791	0.908141	0.363804	0.579848	CRC_vs_HC
hsa-miR-10a-5p.iso.t5:A.seed:0.t3:gtg.ad:A.mm:0	0.768428	-0.0520591	0.474169	-0.10979	0.912576	0.957487	CRC_vs_HC
hsa-miR-10a-5p.iso.t5:A.seed:0.t3:gtg.ad:AA.mm:0	0.0840591	-0.902881	2.57708	-0.35035	0.726076		CRC_vs_HC
hsa-miR-10a-5p.iso.t5:A.seed:0.t3:gtg.ad:AT.mm:0	0.569877	-0.259722	0.579844	-0.447917	0.654213	0.813476	CRC_vs_HC
hsa-miR-10a-5p.iso.t5:A.seed:0.t3:gtg.ad:CT.mm:0	0.405117	-1.28897	0.933399	-1.38094	0.167296	0.357693	CRC_vs_HC
hsa-miR-10a-5p.iso.t5:A.seed:0.t3:gtg.ad:T.mm:0	0.660606	-0.662976	0.578275	-1.14647	0.2516	0.462543	CRC_vs_HC
hsa-miR-10a-5p.iso.t5:A.seed:0.t3:gtg.ad:TGT.mm:0	0.0786052	-0.888237	2.27376	-0.390646	0.696059		CRC_vs_HC
hsa-miR-10a-5p.iso.t5:A.seed:0.t3:gtg.ad:TT.mm:0	3.6602	-0.963757	0.42521	-2.26654	0.0234183	0.0888474	CRC_vs_HC
hsa-miR-10a-5p.iso.t5:A.seed:0.t3:gtg.ad:TTG.mm:0	0.293979	-1.09491	1.19914	-0.913075	0.361203		CRC_vs_HC
hsa-miR-10a-5p.iso.t5:A.seed:0.t3:T.ad:0.mm:0	12.3871	0.801659	0.241124	3.32468	0.000885202	0.00688292	CRC_vs_HC
hsa-miR-10a-5p.iso.t5:A.seed:0.t3:tg.ad:0.mm:0	307.874	0.624348	0.159068	3.92504	8.67156e-05	0.0010056	CRC_vs_HC
hsa-miR-10a-5p.iso.t5:A.seed:0.t3:tg.ad:A.mm:0	20.571	0.0940306	0.162798	0.577589	0.563542	0.749078	CRC_vs_HC
hsa-miR-10a-5p.iso.t5:A.seed:0.t3:tg.ad:AA.mm:0	0.139144	-1.14569	1.3329	-0.859546	0.390039		CRC_vs_HC
hsa-miR-10a-5p.iso.t5:A.seed:0.t3:tg.ad:C.mm:0	0.111767	-0.297883	1.77159	-0.168144	0.86647		CRC_vs_HC
hsa-miR-10a-5p.iso.t5:ATA.seed:0.t3:g.ad:0.mm:0	0.54056	0.481213	0.586279	0.820791	0.411765	0.623911	CRC_vs_HC
hsa-miR-10a-5p.iso.t5:ATA.seed:0.t3:gtg.ad:0.mm:0	0.0560429	-0.406775	3.10553	-0.130984	0.895788		CRC_vs_HC
hsa-miR-10a-5p.iso.t5:t.seed:0.t3:0.ad:0.mm:0	19399	0.531331	0.175187	3.03294	0.00242183	0.0156083	CRC_vs_HC
hsa-miR-10a-5p.iso.t5:t.seed:0.t3:0.ad:A.mm:0	9476.51	0.208647	0.156883	1.32996	0.183533	0.380514	CRC_vs_HC
hsa-miR-10a-5p.iso.t5:t.seed:0.t3:0.ad:AA.mm:0	414.742	0.281491	0.180779	1.5571	0.119446	0.286374	CRC_vs_HC
hsa-miR-10a-5p.iso.t5:t.seed:0.t3:0.ad:AAA.mm:0	20.6064	0.934147	0.245431	3.80614	0.00014115	0.001503	CRC_vs_HC
hsa-miR-10a-5p.iso.t5:t.seed:0.t3:0.ad:AAC.mm:0	0.0811778	-0.830095	3.53909	-0.234551	0.814557		CRC_vs_HC
hsa-miR-10a-5p.iso.t5:t.seed:0.t3:0.ad:AAG.mm:0	0.334969	1.16566	0.892695	1.30578	0.191627		CRC_vs_HC
hsa-miR-10a-5p.iso.t5:t.seed:0.t3:0.ad:AAT.mm:0	1.57998	0.80033	0.414125	1.93258	0.0532881	0.162053	CRC_vs_HC
hsa-miR-10a-5p.iso.t5:t.seed:0.t3:0.ad:AC.mm:0	1.73868	0.814227	0.4303	1.89223	0.0584602	0.173103	CRC_vs_HC
hsa-miR-10a-5p.iso.t5:t.seed:0.t3:0.ad:AG.mm:0	5.38539	0.355584	0.285683	1.24468	0.213249	0.417356	CRC_vs_HC
hsa-miR-10a-5p.iso.t5:t.seed:0.t3:0.ad:AGA.mm:0	0.564803	0.0718998	0.72906	0.0986198	0.92144	0.961193	CRC_vs_HC
hsa-miR-10a-5p.iso.t5:t.seed:0.t3:0.ad:AGT.mm:0	0.139545	-0.59911	1.58869	-0.37711	0.706092		CRC_vs_HC
hsa-miR-10a-5p.iso.t5:t.seed:0.t3:0.ad:AT.mm:0	18.1691	0.686646	0.195495	3.51235	0.00044416	0.00388703	CRC_vs_HC
hsa-miR-10a-5p.iso.t5:t.seed:0.t3:0.ad:ATA.mm:0	0.197878	-0.19858	1.56802	-0.126644	0.899222		CRC_vs_HC
hsa-miR-10a-5p.iso.t5:t.seed:0.t3:0.ad:C.mm:0	14.089	0.194596	0.278211	0.699453	0.484269	0.69068	CRC_vs_HC
hsa-miR-10a-5p.iso.t5:t.seed:0.t3:0.ad:CA.mm:0	0.78624	0.428698	0.665993	0.643697	0.519772	0.717916	CRC_vs_HC
hsa-miR-10a-5p.iso.t5:t.seed:0.t3:0.ad:CT.mm:0	0.126921	-0.525995	1.59377	-0.330032	0.741376		CRC_vs_HC
hsa-miR-10a-5p.iso.t5:t.seed:0.t3:0.ad:GG.mm:0	0.106417	-0.777	1.97302	-0.393812	0.693719		CRC_vs_HC
hsa-miR-10a-5p.iso.t5:t.seed:0.t3:0.ad:GT.mm:0	1.84669	0.0796933	0.362894	0.219605	0.826179	0.908284	CRC_vs_HC
hsa-miR-10a-5p.iso.t5:t.seed:0.t3:g.ad:0.mm:0	9954.97	0.27065	0.14944	1.8111	0.070126	0.197581	CRC_vs_HC
hsa-miR-10a-5p.iso.t5:t.seed:0.t3:g.ad:A.mm:0	102.967	0.15602	0.155762	1.00166	0.316509	0.536265	CRC_vs_HC
hsa-miR-10a-5p.iso.t5:t.seed:0.t3:g.ad:AA.mm:0	82.0698	-0.215544	0.186758	-1.15413	0.248445	0.458626	CRC_vs_HC
hsa-miR-10a-5p.iso.t5:t.seed:0.t3:g.ad:AAA.mm:0	2.45897	-0.676034	0.334423	-2.02149	0.0432286	0.139634	CRC_vs_HC
hsa-miR-10a-5p.iso.t5:t.seed:0.t3:g.ad:AAT.mm:0	0.152076	-0.600725	1.73474	-0.346291	0.729124		CRC_vs_HC
hsa-miR-10a-5p.iso.t5:t.seed:0.t3:g.ad:AC.mm:0	0.187258	-0.502223	2.12624	-0.236202	0.813276		CRC_vs_HC
hsa-miR-10a-5p.iso.t5:t.seed:0.t3:g.ad:AG.mm:0	1.43231	0.123769	0.375778	0.329367	0.741878	0.868879	CRC_vs_HC
hsa-miR-10a-5p.iso.t5:t.seed:0.t3:g.ad:AT.mm:0	4.63646	0.123764	0.2535	0.488221	0.625394	0.793247	CRC_vs_HC
hsa-miR-10a-5p.iso.t5:t.seed:0.t3:g.ad:C.mm:0	1.76038	0.221164	0.389605	0.56766	0.570266	0.753462	CRC_vs_HC
hsa-miR-10a-5p.iso.t5:t.seed:0.t3:g.ad:CA.mm:0	3.12338	-0.401357	0.341377	-1.1757	0.239715	0.448398	CRC_vs_HC
hsa-miR-10a-5p.iso.t5:t.seed:0.t3:g.ad:CAA.mm:0	0.180147	-1.32094	1.06142	-1.2445	0.213314		CRC_vs_HC
hsa-miR-10a-5p.iso.t5:t.seed:0.t3:g.ad:CG.mm:0	0.416428	0.449482	0.719577	0.624648	0.532202	0.727514	CRC_vs_HC
hsa-miR-10a-5p.iso.t5:t.seed:0.t3:g.ad:CT.mm:0	0.767696	-0.352263	0.50585	-0.696377	0.486193	0.691781	CRC_vs_HC
hsa-miR-10a-5p.iso.t5:t.seed:0.t3:g.ad:T.mm:0	17.8851	-0.310096	0.229163	-1.35317	0.176002	0.370805	CRC_vs_HC
hsa-miR-10a-5p.iso.t5:t.seed:0.t3:g.ad:TA.mm:0	8.70702	-1.49548	0.316828	-4.72018	2.3564e-06	4.73383e-05	CRC_vs_HC
hsa-miR-10a-5p.iso.t5:t.seed:0.t3:g.ad:TAA.mm:0	0.873105	-1.76677	0.770357	-2.29345	0.0218221	0.0844762	CRC_vs_HC
hsa-miR-10a-5p.iso.t5:t.seed:0.t3:g.ad:TG.mm:0	1.62233	-1.93263	0.55774	-3.46511	0.000530013	0.00445442	CRC_vs_HC
hsa-miR-10a-5p.iso.t5:t.seed:0.t3:g.ad:TT.mm:0	8.38531	-1.79327	0.431747	-4.15353	3.27388e-05	0.000446769	CRC_vs_HC
hsa-miR-10a-5p.iso.t5:t.seed:0.t3:g.ad:TTA.mm:0	0.0486871	-1.01764	3.81594	-0.266682	0.789714		CRC_vs_HC
hsa-miR-10a-5p.iso.t5:t.seed:0.t3:gtg.ad:0.mm:0	387.717	0.182085	0.181175	1.00502	0.314887	0.53427	CRC_vs_HC
hsa-miR-10a-5p.iso.t5:t.seed:0.t3:gtg.ad:A.mm:0	3.97095	0.0110955	0.303298	0.0365828	0.970818	0.985868	CRC_vs_HC
hsa-miR-10a-5p.iso.t5:t.seed:0.t3:gtg.ad:AA.mm:0	0.796503	-0.0180118	0.537895	-0.0334858	0.973287	0.987322	CRC_vs_HC
hsa-miR-10a-5p.iso.t5:t.seed:0.t3:gtg.ad:AAA.mm:0	0.15672	-0.911035	1.34348	-0.678116	0.497698		CRC_vs_HC
hsa-miR-10a-5p.iso.t5:t.seed:0.t3:gtg.ad:AT.mm:0	1.85645	0.520053	0.410578	1.26664	0.205285	0.40718	CRC_vs_HC
hsa-miR-10a-5p.iso.t5:t.seed:0.t3:gtg.ad:ATA.mm:0	0.0240133	-0.93186	3.81623	-0.244184	0.807089		CRC_vs_HC
hsa-miR-10a-5p.iso.t5:t.seed:0.t3:gtg.ad:ATG.mm:0	5.23216	0.290656	0.403944	0.719546	0.471805	0.678545	CRC_vs_HC
hsa-miR-10a-5p.iso.t5:t.seed:0.t3:gtg.ad:C.mm:0	0.381192	-1.23024	1.12787	-1.09076	0.275377		CRC_vs_HC
hsa-miR-10a-5p.iso.t5:t.seed:0.t3:gtg.ad:CT.mm:0	1.57531	-0.641481	0.428988	-1.49534	0.134827	0.310308	CRC_vs_HC
hsa-miR-10a-5p.iso.t5:t.seed:0.t3:gtg.ad:CTG.mm:0	3.80884	0.192746	0.355747	0.541806	0.587952	0.767926	CRC_vs_HC
hsa-miR-10a-5p.iso.t5:t.seed:0.t3:gtg.ad:T.mm:0	1.16548	-0.0238778	0.454003	-0.0525938	0.958056	0.979072	CRC_vs_HC
hsa-miR-10a-5p.iso.t5:t.seed:0.t3:gtg.ad:TG.mm:0	0.127716	0.210709	1.6256	0.12962	0.896867		CRC_vs_HC
hsa-miR-10a-5p.iso.t5:t.seed:0.t3:gtg.ad:TGA.mm:0	1.49139	0.545518	0.387738	1.40692	0.15945	0.347754	CRC_vs_HC
hsa-miR-10a-5p.iso.t5:t.seed:0.t3:gtg.ad:TGT.mm:0	0.472282	0.94024	0.571391	1.64553	0.0998613	0.252645	CRC_vs_HC
hsa-miR-10a-5p.iso.t5:t.seed:0.t3:gtg.ad:TT.mm:0	3.84848	-0.153168	0.297022	-0.515677	0.60608	0.780273	CRC_vs_HC
hsa-miR-10a-5p.iso.t5:t.seed:0.t3:gtg.ad:TTA.mm:0	0.0420441	-0.774682	3.81644	-0.202985	0.839146		CRC_vs_HC
hsa-miR-10a-5p.iso.t5:t.seed:0.t3:gtg.ad:TTG.mm:0	4.13437	0.656564	0.449129	1.46186	0.14378	0.324723	CRC_vs_HC
hsa-miR-10a-5p.iso.t5:t.seed:0.t3:gtg.ad:TTT.mm:0	0.100572	-0.919077	2.22532	-0.413008	0.679601		CRC_vs_HC
hsa-miR-10a-5p.iso.t5:t.seed:0.t3:T.ad:0.mm:0	2772.71	0.458363	0.179694	2.5508	0.0107477	0.0500458	CRC_vs_HC
hsa-miR-10a-5p.iso.t5:t.seed:0.t3:T.ad:C.mm:0	0.156305	-0.023862	1.58074	-0.0150955	0.987956		CRC_vs_HC
hsa-miR-10a-5p.iso.t5:t.seed:0.t3:T.ad:G.mm:0	2.45008	0.127484	0.368279	0.346163	0.729221	0.862303	CRC_vs_HC
hsa-miR-10a-5p.iso.t5:t.seed:0.t3:T.ad:GA.mm:0	0.249687	-0.934903	1.6744	-0.558353	0.576603		CRC_vs_HC
hsa-miR-10a-5p.iso.t5:t.seed:0.t3:T.ad:GT.mm:0	0.107651	0.0212464	1.79482	0.0118376	0.990555		CRC_vs_HC
hsa-miR-10a-5p.iso.t5:t.seed:0.t3:T.ad:T.mm:0	2.6292	0.242581	0.369355	0.656769	0.51133	0.71208	CRC_vs_HC
hsa-miR-10a-5p.iso.t5:t.seed:0.t3:T.ad:TA.mm:0	0.211719	-0.0470553	1.03645	-0.0454002	0.963788		CRC_vs_HC
hsa-miR-10a-5p.iso.t5:t.seed:0.t3:T.ad:TT.mm:0	0.319873	-0.938976	0.787296	-1.19266	0.233003		CRC_vs_HC
hsa-miR-10a-5p.iso.t5:t.seed:0.t3:T.ad:TTA.mm:0	0.0292185	-1.13409	3.81635	-0.297165	0.76634		CRC_vs_HC
hsa-miR-10a-5p.iso.t5:t.seed:0.t3:T.ad:TTG.mm:0	0.0301934	-0.690861	3.81621	-0.181033	0.856341		CRC_vs_HC
hsa-miR-10a-5p.iso.t5:t.seed:0.t3:TA.ad:0.mm:0	21.4482	0.391039	0.181026	2.16013	0.030763	0.10862	CRC_vs_HC
hsa-miR-10a-5p.iso.t5:t.seed:0.t3:TA.ad:G.mm:0	0.0586747	-0.301445	2.66655	-0.113047	0.909993		CRC_vs_HC
hsa-miR-10a-5p.iso.t5:t.seed:0.t3:TA.ad:GA.mm:0	0.0490429	-0.496501	3.81643	-0.130096	0.896491		CRC_vs_HC
hsa-miR-10a-5p.iso.t5:t.seed:0.t3:TA.ad:T.mm:0	0.797414	0.942523	0.710081	1.32735	0.184394	0.381556	CRC_vs_HC
hsa-miR-10a-5p.iso.t5:t.seed:0.t3:TAA.ad:0.mm:0	6.59552	0.488919	0.258282	1.89296	0.0583627	0.172865	CRC_vs_HC
hsa-miR-10a-5p.iso.t5:t.seed:0.t3:TAA.ad:A.mm:0	0.784907	1.09726	0.504637	2.17435	0.0296791	0.105586	CRC_vs_HC
hsa-miR-10a-5p.iso.t5:t.seed:0.t3:TAA.ad:AA.mm:0	0.0813386	0.0745602	2.26344	0.032941	0.973722		CRC_vs_HC
hsa-miR-10a-5p.iso.t5:t.seed:0.t3:TAA.ad:AAA.mm:0	0.130762	0.116248	1.97107	0.0589768	0.952971		CRC_vs_HC
hsa-miR-10a-5p.iso.t5:t.seed:0.t3:tg.ad:0.mm:0	3286.39	0.3319	0.17043	1.94742	0.0514839	0.158079	CRC_vs_HC
hsa-miR-10a-5p.iso.t5:t.seed:0.t3:tg.ad:A.mm:0	92.1965	-0.487496	0.208235	-2.34109	0.0192275	0.0771385	CRC_vs_HC
hsa-miR-10a-5p.iso.t5:t.seed:0.t3:tg.ad:AA.mm:0	11.0758	-0.777433	0.259961	-2.99058	0.00278449	0.0174462	CRC_vs_HC
hsa-miR-10a-5p.iso.t5:t.seed:0.t3:tg.ad:AAA.mm:0	2.78215	-1.06799	0.352499	-3.02976	0.00244748	0.0157361	CRC_vs_HC
hsa-miR-10a-5p.iso.t5:t.seed:0.t3:tg.ad:AAT.mm:0	0.100366	-1.15118	2.58184	-0.445877	0.655686		CRC_vs_HC
hsa-miR-10a-5p.iso.t5:t.seed:0.t3:tg.ad:AG.mm:0	6.52159	1.45552	0.325193	4.47585	7.61078e-06	0.000129948	CRC_vs_HC
hsa-miR-10a-5p.iso.t5:t.seed:0.t3:tg.ad:AGA.mm:0	4.83417	1.00035	0.308945	3.23797	0.00120384	0.0088151	CRC_vs_HC
hsa-miR-10a-5p.iso.t5:t.seed:0.t3:tg.ad:AGG.mm:0	0.921296	1.24191	0.536044	2.3168	0.0205149	0.0808919	CRC_vs_HC
hsa-miR-10a-5p.iso.t5:t.seed:0.t3:tg.ad:AGT.mm:0	1.57646	1.50109	0.45687	3.28559	0.00101768	0.00776014	CRC_vs_HC
hsa-miR-10a-5p.iso.t5:t.seed:0.t3:tg.ad:AT.mm:0	0.13656	-0.0701222	1.1446	-0.0612636	0.951149		CRC_vs_HC
hsa-miR-10a-5p.iso.t5:t.seed:0.t3:tg.ad:C.mm:0	2.01268	-0.13658	0.367749	-0.371394	0.710344	0.85087	CRC_vs_HC
hsa-miR-10a-5p.iso.t5:t.seed:0.t3:tg.ad:CA.mm:0	0.177853	-0.19135	0.88063	-0.217287	0.827984		CRC_vs_HC
hsa-miR-10a-5p.iso.t5:t.seed:0.t3:tg.ad:CCA.mm:0	0.180694	-0.622979	1.0485	-0.59416	0.552405		CRC_vs_HC
hsa-miR-10a-5p.iso.t5:t.seed:0.t3:tg.ad:CG.mm:0	5.79478	0.819963	0.251921	3.25484	0.00113457	0.00842781	CRC_vs_HC
hsa-miR-10a-5p.iso.t5:t.seed:0.t3:tg.ad:CGA.mm:0	3.66295	-0.165047	0.269072	-0.613393	0.539616	0.733149	CRC_vs_HC
hsa-miR-10a-5p.iso.t5:t.seed:0.t3:tg.ad:CGG.mm:0	0.749817	-0.124534	0.548002	-0.22725	0.820229	0.905281	CRC_vs_HC
hsa-miR-10a-5p.iso.t5:t.seed:0.t3:tg.ad:CGT.mm:0	1.44118	0.0504346	0.404191	0.124779	0.900699	0.950659	CRC_vs_HC
hsa-miR-10a-5p.iso.t5:t.seed:0.t3:tg.ad:CT.mm:0	0.0708592	-1.20657	3.58939	-0.336149	0.736759		CRC_vs_HC
hsa-miR-10a-5p.iso.t5:t.seed:0.t3:tg.ad:CTA.mm:0	0.0464811	-1.20304	3.81624	-0.315242	0.752578		CRC_vs_HC
hsa-miR-10a-5p.iso.t5:t.seed:0.t3:tg.ad:CTT.mm:0	0.172952	-0.93196	2.1904	-0.425475	0.67049		CRC_vs_HC
hsa-miR-10a-5p.iso.t5:t.seed:0.t3:tg.ad:GG.mm:0	16.7055	0.69652	0.257518	2.70474	0.00683576	0.0353666	CRC_vs_HC
hsa-miR-10a-5p.iso.t5:t.seed:0.t3:tg.ad:GGA.mm:0	6.18845	0.0991838	0.300928	0.329593	0.741707	0.868879	CRC_vs_HC
hsa-miR-10a-5p.iso.t5:t.seed:0.t3:tg.ad:GGG.mm:0	0.727882	0.701554	0.503994	1.39199	0.163925	0.353794	CRC_vs_HC
hsa-miR-10a-5p.iso.t5:t.seed:0.t3:tg.ad:GGT.mm:0	1.25623	0.418865	0.489759	0.855247	0.392414	0.607717	CRC_vs_HC
hsa-miR-10a-5p.iso.t5:t.seed:0.t3:tg.ad:GTG.mm:0	0.336001	0.687752	0.678384	1.01381	0.310674		CRC_vs_HC
hsa-miR-10a-5p.iso.t5:ta.seed:0.t3:0.ad:0.mm:0	42.6876	0.653306	0.227222	2.87519	0.0040378	0.0234515	CRC_vs_HC
hsa-miR-10a-5p.iso.t5:TA.seed:0.t3:0.ad:0.mm:0	0.732371	1.12404	0.509906	2.20441	0.0274955	0.100024	CRC_vs_HC
hsa-miR-10a-5p.iso.t5:ta.seed:0.t3:0.ad:A.mm:0	49.1984	0.539591	0.178568	3.02177	0.00251305	0.0160621	CRC_vs_HC
hsa-miR-10a-5p.iso.t5:TA.seed:0.t3:0.ad:A.mm:0	0.156345	0.0854451	1.16486	0.0733522	0.941526		CRC_vs_HC
hsa-miR-10a-5p.iso.t5:ta.seed:0.t3:0.ad:AA.mm:0	6.01899	0.759418	0.276232	2.7492	0.0059741	0.0319179	CRC_vs_HC
hsa-miR-10a-5p.iso.t5:ta.seed:0.t3:0.ad:AAA.mm:0	0.530402	1.21556	0.684386	1.77614	0.0757104	0.208532	CRC_vs_HC
hsa-miR-10a-5p.iso.t5:ta.seed:0.t3:0.ad:AAC.mm:0	0.00968238	-0.661652	3.81647	-0.173368	0.862362		CRC_vs_HC
hsa-miR-10a-5p.iso.t5:ta.seed:0.t3:0.ad:AAT.mm:0	0.0252436	-0.464628	3.81644	-0.121744	0.903102		CRC_vs_HC
hsa-miR-10a-5p.iso.t5:ta.seed:0.t3:0.ad:AT.mm:0	0.110137	-0.736071	1.47632	-0.498586	0.618071		CRC_vs_HC
hsa-miR-10a-5p.iso.t5:ta.seed:0.t3:0.ad:C.mm:0	0.088175	-0.355351	2.95681	-0.120181	0.90434		CRC_vs_HC
hsa-miR-10a-5p.iso.t5:ta.seed:0.t3:g.ad:0.mm:0	46.0451	0.556024	0.162759	3.41624	0.000634915	0.00518682	CRC_vs_HC
hsa-miR-10a-5p.iso.t5:TA.seed:0.t3:g.ad:0.mm:0	4.47967	0.50165	0.224437	2.23514	0.025408	0.0944633	CRC_vs_HC
hsa-miR-10a-5p.iso.t5:ta.seed:0.t3:g.ad:A.mm:0	0.253829	0.357272	0.887254	0.402672	0.687189		CRC_vs_HC
hsa-miR-10a-5p.iso.t5:ta.seed:0.t3:g.ad:AA.mm:0	0.492935	-0.388668	0.600292	-0.647464	0.517332	0.716285	CRC_vs_HC
hsa-miR-10a-5p.iso.t5:ta.seed:0.t3:g.ad:T.mm:0	0.247077	0.0707446	0.77638	0.091121	0.927396		CRC_vs_HC
hsa-miR-10a-5p.iso.t5:ta.seed:0.t3:g.ad:TA.mm:0	0.0591593	-0.926229	3.67149	-0.252276	0.800828		CRC_vs_HC
hsa-miR-10a-5p.iso.t5:ta.seed:0.t3:gtg.ad:0.mm:0	1.55216	0.391153	0.484625	0.807126	0.419594	0.630032	CRC_vs_HC
hsa-miR-10a-5p.iso.t5:TA.seed:0.t3:gtg.ad:0.mm:0	0.10173	0.0330208	1.80047	0.0183402	0.985367		CRC_vs_HC
hsa-miR-10a-5p.iso.t5:ta.seed:0.t3:gtg.ad:A.mm:0	0.13222	-0.522622	1.76084	-0.296802	0.766618		CRC_vs_HC
hsa-miR-10a-5p.iso.t5:ta.seed:0.t3:gtg.ad:TGT.mm:0	0.0154803	-0.584254	3.81645	-0.153088	0.878329		CRC_vs_HC
hsa-miR-10a-5p.iso.t5:ta.seed:0.t3:gtg.ad:TT.mm:0	0.235181	-1.62318	1.1187	-1.45095	0.146793		CRC_vs_HC
hsa-miR-10a-5p.iso.t5:ta.seed:0.t3:gtg.ad:TTG.mm:0	0.264565	-0.63753	1.03187	-0.61784	0.536681		CRC_vs_HC
hsa-miR-10a-5p.iso.t5:ta.seed:0.t3:T.ad:0.mm:0	51.082	0.713867	0.184587	3.86737	0.000110014	0.00122961	CRC_vs_HC
hsa-miR-10a-5p.iso.t5:ta.seed:0.t3:T.ad:T.mm:0	0.17983	0.0528759	1.10554	0.0478282	0.961853		CRC_vs_HC
hsa-miR-10a-5p.iso.t5:ta.seed:0.t3:TA.ad:0.mm:0	2.72033	0.893599	0.330099	2.70706	0.00678814	0.0352383	CRC_vs_HC
hsa-miR-10a-5p.iso.t5:ta.seed:0.t3:TA.ad:T.mm:0	0.230684	0.224516	0.838506	0.267757	0.788886		CRC_vs_HC
hsa-miR-10a-5p.iso.t5:ta.seed:0.t3:TAA.ad:0.mm:0	0.434524	0.5253	0.790537	0.664485	0.50638	0.708265	CRC_vs_HC
hsa-miR-10a-5p.iso.t5:ta.seed:0.t3:tg.ad:0.mm:0	14.8481	0.738288	0.251085	2.94039	0.00327795	0.0198476	CRC_vs_HC
hsa-miR-10a-5p.iso.t5:TA.seed:0.t3:tg.ad:0.mm:0	0.678089	0.513936	0.524254	0.98032	0.326928	0.545874	CRC_vs_HC
hsa-miR-10a-5p.iso.t5:ta.seed:0.t3:tg.ad:A.mm:0	0.375736	-0.518249	0.901964	-0.574578	0.565577		CRC_vs_HC
hsa-miR-10a-5p.iso.t5:ta.seed:0.t3:tg.ad:AAA.mm:0	0.0324714	-1.0685	3.8164	-0.279975	0.779496		CRC_vs_HC
hsa-miR-10a-5p.iso.t5:ta.seed:0.t3:tg.ad:AG.mm:0	0.1085	-0.738994	3.40337	-0.217136	0.828102		CRC_vs_HC
hsa-miR-10a-5p.iso.t5:ta.seed:0.t3:tg.ad:GGA.mm:0	0.0687797	-0.961875	2.61549	-0.36776	0.713052		CRC_vs_HC
hsa-miR-10a-5p.iso.t5:tac.seed:0.t3:0.ad:0.mm:0	5.926	0.626413	0.319226	1.96229	0.0497293	0.154447	CRC_vs_HC
hsa-miR-10a-5p.iso.t5:tac.seed:0.t3:0.ad:A.mm:0	2.27775	0.966436	0.426488	2.26603	0.0234493	0.0888953	CRC_vs_HC
hsa-miR-10a-5p.iso.t5:tac.seed:0.t3:0.ad:AA.mm:0	0.148959	-0.243597	2.17051	-0.11223	0.910641		CRC_vs_HC
hsa-miR-10a-5p.iso.t5:tac.seed:0.t3:g.ad:0.mm:0	8.39345	0.0999597	0.327409	0.305305	0.760134	0.878689	CRC_vs_HC
hsa-miR-10a-5p.iso.t5:tac.seed:0.t3:g.ad:A.mm:0	0.19874	-1.0901	2.13747	-0.509993	0.610056		CRC_vs_HC
hsa-miR-10a-5p.iso.t5:tac.seed:0.t3:g.ad:AA.mm:0	0.151338	-0.725211	2.14964	-0.337363	0.735843		CRC_vs_HC
hsa-miR-10a-5p.iso.t5:tac.seed:0.t3:T.ad:0.mm:0	1.53861	0.708644	0.446437	1.58733	0.112438	0.274503	CRC_vs_HC
hsa-miR-10a-5p.iso.t5:tac.seed:0.t3:tg.ad:0.mm:0	1.62362	0.791435	0.53058	1.49164	0.135794	0.311936	CRC_vs_HC
hsa-miR-10a-5p.ref.t5:0.seed:0.t3:0.ad:0.mm:0	34827	0.336377	0.168787	1.99291	0.046271	0.147001	CRC_vs_HC
hsa-miR-10b-3p.iso.t5:0.seed:0.t3:0.ad:T.mm:0	0.117022	-0.479877	1.47212	-0.325977	0.744442		CRC_vs_HC
hsa-miR-10b-3p.iso.t5:0.seed:0.t3:aat.ad:0.mm:0	0.0739882	-0.614567	3.02919	-0.202882	0.839227		CRC_vs_HC
hsa-miR-10b-3p.iso.t5:0.seed:0.t3:aat.ad:CAT.mm:0	0.0635789	-1.05303	3.62601	-0.29041	0.771502		CRC_vs_HC
hsa-miR-10b-3p.iso.t5:0.seed:0.t3:at.ad:0.mm:0	0.190524	-0.175972	1.26799	-0.13878	0.889624		CRC_vs_HC
hsa-miR-10b-3p.iso.t5:0.seed:0.t3:at.ad:T.mm:0	0.274857	-0.0804933	0.693306	-0.116101	0.907573		CRC_vs_HC
hsa-miR-10b-3p.iso.t5:0.seed:0.t3:t.ad:0.mm:0	0.486838	-0.400801	0.692547	-0.578735	0.562768	0.748608	CRC_vs_HC
hsa-miR-10b-3p.iso.t5:0.seed:0.t3:t.ad:A.mm:0	0.391185	-1.38172	0.66067	-2.0914	0.0364924		CRC_vs_HC
hsa-miR-10b-3p.iso.t5:a.seed:0.t3:0.ad:0.mm:0	5.40427	-0.937876	0.317839	-2.95079	0.00316962	0.0193434	CRC_vs_HC
hsa-miR-10b-3p.iso.t5:a.seed:0.t3:0.ad:T.mm:0	0.143127	-0.871802	1.35069	-0.645447	0.518638		CRC_vs_HC
hsa-miR-10b-3p.iso.t5:a.seed:0.t3:A.ad:0.mm:0	0.903796	-0.716478	0.507899	-1.41067	0.158342	0.346359	CRC_vs_HC
hsa-miR-10b-3p.iso.t5:a.seed:0.t3:at.ad:0.mm:0	0.158144	-0.840875	1.13677	-0.739703	0.45948		CRC_vs_HC
hsa-miR-10b-3p.iso.t5:a.seed:0.t3:at.ad:C.mm:0	0.0100131	-0.808556	3.81636	-0.211866	0.832212		CRC_vs_HC
hsa-miR-10b-3p.iso.t5:a.seed:0.t3:at.ad:CT.mm:0	0.0483827	-0.735437	3.13789	-0.234373	0.814695		CRC_vs_HC
hsa-miR-10b-3p.iso.t5:a.seed:0.t3:at.ad:T.mm:0	0.0867637	-1.14379	1.81281	-0.63095	0.528073		CRC_vs_HC
hsa-miR-10b-3p.iso.t5:a.seed:0.t3:t.ad:0.mm:0	0.516221	-0.630917	0.574859	-1.09752	0.272416	0.4873	CRC_vs_HC
hsa-miR-10b-3p.iso.t5:a.seed:0.t3:t.ad:A.mm:0	0.471449	-0.190626	0.605186	-0.314988	0.752771	0.874645	CRC_vs_HC
hsa-miR-10b-3p.iso.t5:a.seed:0.t3:t.ad:AA.mm:0	0.0360635	-0.918411	3.81632	-0.240653	0.809824		CRC_vs_HC
hsa-miR-10b-3p.iso.t5:ac.seed:0.t3:0.ad:0.mm:0	7.45342	-0.606631	0.296017	-2.04931	0.0404318	0.132702	CRC_vs_HC
hsa-miR-10b-3p.iso.t5:ac.seed:0.t3:0.ad:T.mm:0	0.142239	-0.516132	1.36009	-0.379483	0.704329		CRC_vs_HC
hsa-miR-10b-3p.iso.t5:ac.seed:0.t3:A.ad:0.mm:0	2.59827	0.0539756	0.359809	0.150012	0.880755	0.939612	CRC_vs_HC
hsa-miR-10b-3p.iso.t5:ac.seed:0.t3:A.ad:A.mm:0	0.0975746	-1.67303	2.23033	-0.750126	0.453179		CRC_vs_HC
hsa-miR-10b-3p.iso.t5:ac.seed:0.t3:at.ad:0.mm:0	0.0484555	-1.10009	3.14585	-0.349696	0.726567		CRC_vs_HC
hsa-miR-10b-3p.iso.t5:ac.seed:0.t3:AT.ad:0.mm:0	0.215459	-0.655842	1.139	-0.575805	0.564747		CRC_vs_HC
hsa-miR-10b-3p.iso.t5:ac.seed:0.t3:at.ad:T.mm:0	0.171533	-1.05326	1.17036	-0.899941	0.368152		CRC_vs_HC
hsa-miR-10b-3p.iso.t5:ac.seed:0.t3:t.ad:0.mm:0	0.466869	-0.248939	0.702467	-0.354378	0.723055	0.857825	CRC_vs_HC
hsa-miR-10b-3p.iso.t5:ac.seed:0.t3:t.ad:A.mm:0	0.66709	-1.24471	0.54604	-2.27953	0.0226358	0.0866318	CRC_vs_HC
hsa-miR-10b-3p.iso.t5:C.seed:0.t3:0.ad:0.mm:0	0.044363	-1.09957	3.81602	-0.288147	0.773234		CRC_vs_HC
hsa-miR-10b-3p.iso.t5:C.seed:0.t3:at.ad:0.mm:0	0.0592784	-0.735805	3.65694	-0.201208	0.840536		CRC_vs_HC
hsa-miR-10b-3p.ref.t5:0.seed:0.t3:0.ad:0.mm:0	4.52503	-0.397753	0.274772	-1.44758	0.147736	0.330448	CRC_vs_HC
hsa-miR-10b-5p.iso.t5:0.seed:0.t3:0.ad:A.mm:0	4218.86	-1.1558	0.257261	-4.49273	7.03166e-06	0.000122184	CRC_vs_HC
hsa-miR-10b-5p.iso.t5:0.seed:0.t3:0.ad:AA.mm:0	101.989	-1.08739	0.274952	-3.95485	7.65837e-05	0.000915615	CRC_vs_HC
hsa-miR-10b-5p.iso.t5:0.seed:0.t3:0.ad:AAA.mm:0	8.25277	-0.944169	0.304881	-3.09685	0.0019559	0.0131056	CRC_vs_HC
hsa-miR-10b-5p.iso.t5:0.seed:0.t3:0.ad:AAG.mm:0	0.223072	-1.13194	1.68511	-0.671727	0.501757		CRC_vs_HC
hsa-miR-10b-5p.iso.t5:0.seed:0.t3:0.ad:AAT.mm:0	0.82213	-1.57534	0.58242	-2.70482	0.00683424	0.0353666	CRC_vs_HC
hsa-miR-10b-5p.iso.t5:0.seed:0.t3:0.ad:AC.mm:0	0.463824	-1.06821	0.655664	-1.6292	0.103271	0.258309	CRC_vs_HC
hsa-miR-10b-5p.iso.t5:0.seed:0.t3:0.ad:AG.mm:0	1.42119	-0.634046	0.450972	-1.40595	0.159737	0.348003	CRC_vs_HC
hsa-miR-10b-5p.iso.t5:0.seed:0.t3:0.ad:AGA.mm:0	0.146725	-1.56705	2.16045	-0.725334	0.468247		CRC_vs_HC
hsa-miR-10b-5p.iso.t5:0.seed:0.t3:0.ad:AGT.mm:0	0.0463821	-0.999047	3.816	-0.261805	0.793472		CRC_vs_HC
hsa-miR-10b-5p.iso.t5:0.seed:0.t3:0.ad:AT.mm:0	9.78656	-1.34099	0.265519	-5.05046	4.40756e-07	1.12617e-05	CRC_vs_HC
hsa-miR-10b-5p.iso.t5:0.seed:0.t3:0.ad:ATA.mm:0	0.145639	-1.20435	2.17147	-0.554626	0.579151		CRC_vs_HC
hsa-miR-10b-5p.iso.t5:0.seed:0.t3:0.ad:C.mm:0	10.0366	-1.09203	0.355693	-3.07014	0.00213959	0.0141435	CRC_vs_HC
hsa-miR-10b-5p.iso.t5:0.seed:0.t3:0.ad:CA.mm:0	0.186191	-0.721658	1.32832	-0.543287	0.586932		CRC_vs_HC
hsa-miR-10b-5p.iso.t5:0.seed:0.t3:0.ad:CT.mm:0	0.0879308	-1.2854	2.9605	-0.434183	0.664156		CRC_vs_HC
hsa-miR-10b-5p.iso.t5:0.seed:0.t3:0.ad:GT.mm:0	0.875549	-1.70005	0.568973	-2.98793	0.00280875	0.0175654	CRC_vs_HC
hsa-miR-10b-5p.iso.t5:0.seed:0.t3:g.ad:0.mm:0	135917	-0.945912	0.265968	-3.55648	0.000375852	0.00342225	CRC_vs_HC
hsa-miR-10b-5p.iso.t5:0.seed:0.t3:g.ad:A.mm:0	1304.24	-1.04626	0.271973	-3.84694	0.000119604	0.00131237	CRC_vs_HC
hsa-miR-10b-5p.iso.t5:0.seed:0.t3:g.ad:AA.mm:0	305.484	-1.13459	0.286138	-3.96516	7.33462e-05	0.000889349	CRC_vs_HC
hsa-miR-10b-5p.iso.t5:0.seed:0.t3:g.ad:AAA.mm:0	9.5337	-1.19968	0.322048	-3.72514	0.000195204	0.00198473	CRC_vs_HC
hsa-miR-10b-5p.iso.t5:0.seed:0.t3:g.ad:AAC.mm:0	0.0702917	-0.940122	3.03296	-0.309968	0.756585		CRC_vs_HC
hsa-miR-10b-5p.iso.t5:0.seed:0.t3:g.ad:AAG.mm:0	0.100317	-1.28082	2.22772	-0.574946	0.565328		CRC_vs_HC
hsa-miR-10b-5p.iso.t5:0.seed:0.t3:g.ad:AAT.mm:0	0.629449	-0.812481	0.674727	-1.20416	0.228526	0.435534	CRC_vs_HC
hsa-miR-10b-5p.iso.t5:0.seed:0.t3:g.ad:AC.mm:0	0.767834	-1.66347	0.761858	-2.18343	0.0290039	0.103815	CRC_vs_HC
hsa-miR-10b-5p.iso.t5:0.seed:0.t3:g.ad:AG.mm:0	5.62548	-1.40239	0.291833	-4.80546	1.544e-06	3.3176e-05	CRC_vs_HC
hsa-miR-10b-5p.iso.t5:0.seed:0.t3:g.ad:AGA.mm:0	0.299946	-1.85687	0.896042	-2.0723	0.0382377		CRC_vs_HC
hsa-miR-10b-5p.iso.t5:0.seed:0.t3:g.ad:AT.mm:0	30.557	-1.11994	0.261479	-4.28308	1.84324e-05	0.000276805	CRC_vs_HC
hsa-miR-10b-5p.iso.t5:0.seed:0.t3:g.ad:ATA.mm:0	0.136283	-1.15504	2.19085	-0.527212	0.598046		CRC_vs_HC
hsa-miR-10b-5p.iso.t5:0.seed:0.t3:g.ad:ATT.mm:0	0.148012	-1.03688	1.23893	-0.836917	0.402639		CRC_vs_HC
[truncated: 75,858 more rows]
